# Supplementary material for: Sex differences in presenting symptoms of acute coronary syndrome: the EPIHeart cohort study
Source: PubMed Central journal article supplement — BMJ Open. 2018 Feb 23;8(2):e018798. doi: 10.1136/bmjopen-2017-018798 (PMC5855399; doi:10.1136/bmjopen-2017-018798), 2018-02-23
Supplement: bmjopen-2017-018798.draft_revisions.pdf [file bmjopen-2017-018798.draft_revisions.pdf]

# BMJ Open

BMJ Open is committed to open peer review. As part of this commitment we make the peer review history of every article we publish publicly available.

When an article is published we post the peer reviewers' comments and the authors' responses online. We also post the versions of the paper that were used during peer review. These are the versions that the peer review comments apply to.

The versions of the paper that follow are the versions that were submitted during the peer review process. They are not the versions of record or the final published versions. They should not be cited or distributed as the published version of this manuscript.

BMJ Open is an open access journal and the full, final, typeset and author-corrected version of record of the manuscript is available on our site with no access controls, subscription charges or pay-per-view fees (<http://bmjopen.bmj.com>).

If you have any questions on BMJ Open's open peer review process please email [editorial.bmjopen@bmj.com](mailto:editorial.bmjopen@bmj.com)

# BMJ Open

## Sex differences in presenting symptoms of acute coronary syndrome: the EPIHeart cohort study

|                                 |                                                                                                                                                                                                                                                                                                                                                                                                                                     |
|---------------------------------|-------------------------------------------------------------------------------------------------------------------------------------------------------------------------------------------------------------------------------------------------------------------------------------------------------------------------------------------------------------------------------------------------------------------------------------|
| Journal:                        | <i>BMJ Open</i>                                                                                                                                                                                                                                                                                                                                                                                                                     |
| Manuscript ID                   | bmjopen-2017-018798                                                                                                                                                                                                                                                                                                                                                                                                                 |
| Article Type:                   | Research                                                                                                                                                                                                                                                                                                                                                                                                                            |
| Date Submitted by the Author:   | 24-Jul-2017                                                                                                                                                                                                                                                                                                                                                                                                                         |
| Complete List of Authors:       | Araújo, Carla; Instituto de Saúde Pública da Universidade do Porto, Laszczyńska, Olga<br>Viana, Marta<br>Melão, Filipa<br>Henriques, Ana<br>Borges, Andreia<br>Severo, Milton; University of Porto Medical School, Department of Clinical Epidemiology, Predictive Medicine and Public Health<br>Maciel, Maria Júlia<br>Moreira, Ilídio<br>Azevedo, Ana; University of Porto Medical School, Department of Hygiene and Epidemiology |
| <b>Primary Subject Heading</b>: | Cardiovascular medicine                                                                                                                                                                                                                                                                                                                                                                                                             |
| Secondary Subject Heading:      | Diagnostics                                                                                                                                                                                                                                                                                                                                                                                                                         |
| Keywords:                       | Sex, Acute coronary syndrome, Women, Diagnosis                                                                                                                                                                                                                                                                                                                                                                                      |
|                                 |                                                                                                                                                                                                                                                                                                                                                                                                                                     |

SCHOLARONE™  
Manuscripts

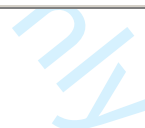

1  
2  
3 **Sex differences in presenting symptoms of acute coronary syndrome: the EPIHeart cohort study**  
4  
5

6 Carla Araújo,<sup>1,2</sup> Olga Laszczyńska,<sup>1</sup> Marta Viana,<sup>1</sup> Filipa Melão,<sup>3</sup> Ana Henriques,<sup>1</sup> Andreia Borges,<sup>1</sup>  
7  
8 Milton Severo,<sup>1,4</sup> Maria Júlia Maciel,<sup>3</sup> Ilídio Moreira,<sup>2</sup> Ana Azevedo<sup>1,4</sup>  
9

10  
11 <sup>1</sup>EPIUnit - Instituto de Saúde Pública, Universidade do Porto, Portugal;

12  
13 <sup>2</sup>Serviço de Cardiologia, Centro Hospitalar de Trás-os-Montes e Alto Douro, EPE, Hospital de São Pedro,  
14  
15 Vila Real, Portugal;

16  
17 <sup>3</sup>Serviço de Cardiologia, Centro Hospitalar São João, EPE, Porto, Portugal;

18  
19 <sup>4</sup>Departamento de Ciências da Saúde Pública e Forenses e Educação Médica, Faculdade de Medicina da  
20  
21 Universidade do Porto, Portugal.  
22

23  
24  
25 **Correspondence:**

26 Carla Araújo

27 Instituto de Saúde Pública da Universidade do Porto

28 Rua das Taipas nº135

29 4050-600 Porto

30 Telephone: +351 222061820 Fax: +351 222061821 Email: [carla-r-araujo@hotmail.com](mailto:carla-r-araujo@hotmail.com)  
31  
32  
33  
34  
35  
36  
37  
38  
39  
40  
41  
42  
43  
44  
45  
46  
47  
48  
49  
50  
51  
52  
53  
54  
55  
56  
57  
58  
59  
60

## ABSTRACT

**Objectives:** Prompt diagnosis of acute coronary syndrome (ACS) remains a challenge, with presenting symptoms affecting the diagnosis algorithm and, consequently, management and outcomes. This study aimed to identify sex differences in presenting symptoms of ACS.

**Design:** Prospective cohort study (EPIHeart).

**Setting:** patients with confirmed diagnosis of type 1 (primary spontaneous) ACS who were consecutively admitted to the Cardiology Department of two tertiary hospitals in Portugal between August 2013 and December 2014 were included.

**Participants:** Presenting symptoms of 873 patients (227 women) were obtained through a face-to-face interview.

**Outcome measures:** Typical pain was defined according to the definition of cardiology societies. Clusters of symptoms other than pain were identified by latent class analysis. Logistic regression was used to quantify differences in presentation of ACS symptoms by sex.

**Results:** Chest pain was reported by 82% of patients, with no differences in frequency or location between sexes. Women were more likely to feel pain with an intensity higher than 8/10 (adjusted odds ratio [OR] 2.77, 95% confidence interval [95% CI] 1.88–4.08). Referred pain was 91% more likely in women (1.91, 1.33–2.74). The multiple symptoms cluster, which was characterized by a high probability of presenting with all symptoms, was almost 4-fold more prevalent in women (3.92, 2.21–6.98).

**Conclusions:** While there are no differences in the frequency or location of pain between sexes, women are more likely to feel pain of higher intensity and to present with referred pain and symptoms other than pain. Knowledge of these ACS presentation profiles is important for health policy decisions and clinical practice.

Keywords: Sex; acute coronary syndrome; women; diagnosis.

### Strengths and limitations

Within a prospective cohort study, presenting symptoms of acute coronary syndrome were obtained through a structured questionnaire applied within the first 48 hours after admission.

1  
2  
3  
4  
5  
6  
7  
8  
9  
10  
11  
12  
13  
14  
15  
16  
17  
18  
19  
20  
21  
22  
23  
24  
25  
26  
27  
28  
29  
30  
31  
32  
33  
34  
35  
36  
37  
38  
39  
40  
41  
42  
43  
44  
45  
46  
47  
48  
49  
50  
51  
52  
53  
54  
55  
56  
57  
58  
59  
60

Consecutive sampling, the detailed clinical information obtained through the questionnaire and adjustment for several confounding variables strengthens our results.

The results of this study are valid for stable patients and those that were able to answer the questionnaire in the acute phase of the acute coronary syndrome.

Some of the sex differences in presenting symptoms may be influenced by selection bias because of a higher risk of non-inclusion of women due to death in the early hours of admission.

For peer review only

## INTRODUCTION

Acute coronary syndrome (ACS) is still one of the main causes of death worldwide and in Europe.<sup>1,2</sup> Coronary heart disease mortality has decreased in the last decades in developed countries because of primary prevention and improvement in treatment of patients with ACS.<sup>2</sup> Attainment of the maximal benefit of treatment of these patients is threatened by delayed diagnosis, partly dependent on clinical suspicion of ACS. The subjective experience of symptoms influences patients' attitudes in seeking help and professionals' interpretation of clinical presentations.<sup>3</sup> Early recognition of ACS may be challenging because while patients with presumed ACS have contact with healthcare providers,<sup>4</sup> many patients do not have an electrocardiogram before hospitalization.<sup>5</sup> Therefore, physicians frequently have to make decisions that are only clinically based.

Women and men generally have the same type of symptoms during an ACS episode, although the proportion presenting with different combinations of symptoms varies.<sup>6</sup> This conflicting evidence can be partly explained by the diverse methodology used, with few prospective studies, usually without a specific questionnaire. In prospective studies, small convenience samples were used and confounding was not always adequately addressed.<sup>7,8</sup> Therefore, sex-specific research on ACS presentation is a challenge and priority.<sup>9</sup>

This study aimed to analyse sex differences in presenting symptoms of ACS within a prospective cohort study, taking into account the contribution of multiple factors to presenting symptoms.

## METHODS

### Study Design and Sample Selection

The EPIHeart cohort study was designed to identify inequalities in management and outcomes of patients with ACS. This study included all consecutive patients who were admitted between August 2013 and December 2014 to the Cardiology Department of two tertiary hospitals in two regions in northern Portugal (Hospital de São João, Porto, covering the metropolitan area of Porto in the coast; and Hospital de São Pedro, Vila Real, covering the interior, northeastern region). Eligible patients were 18 years old or older who lived in the catchment area of these hospitals (districts: Porto, Vila Real, Bragança, and Viseu), with confirmed diagnosis of type 1 (primary spontaneous) ACS. The patients were also expected to be hospitalized for at least 48 hours and not institutionalized before the event. Of 1297 patients initially

1  
2  
3 considered, in 164 the diagnosis of ACS was not confirmed, 60 were excluded due to discharge or  
4 transfer before the interview, 18 died before being invited, and 44 were unable to answer the  
5 questionnaire because of clinical instability, no understanding of Portuguese, hearing problems, or  
6 cognitive impairment. Seventy-two patients refused to participate. For this analysis, we excluded 61  
7 patients who were not admitted because of a symptom (patients referred by a doctor, after a scheduled  
8 appointment or diagnostic exam), four with vasospastic angina, and one illicit drug user. A total of 873  
9 patients were included. The study protocol was in compliance with the principles of the Declaration of  
10 Helsinki and was approved by the Ethics Committee of both hospitals. All patients gave written informed  
11 consent.  
12  
13  
14  
15  
16  
17  
18  
19

### 20 **Procedures and data collection**

21 Presenting symptoms were obtained face-to-face using a structured questionnaire applied by trained  
22 interviewers, within the first 48 hours after admission, whenever possible. Over the following days, a  
23 second interview was conducted to collect data on sociodemographic characteristics and risk factors.  
24 Medical records were reviewed to extract data regarding previous medical history, admission information,  
25 and clinical data during hospitalization.  
26  
27

28 Pain, referred pain, and symptoms other than pain were measured dichotomously (yes/no). For the  
29 location of pain (direct and referred) patients were asked to point out where pain was occurring. To  
30 measure the intensity of pain, a 10-point scale (0, no pain; 10, pain of maximal intensity) was used.  
31 Symptoms other than pain included dyspnoea at rest, exertional dyspnoea, sweating, nausea, vomiting,  
32 dizziness, blurry vision, presyncope, syncope, palpitation, weakness, and an open-ended question of  
33 “other” (12 items). Answers to the last item enabled identification of two other relatively frequent  
34 symptoms, other digestive symptoms and discomfort. Activity at the onset of the episode was measured  
35 dichotomously, including sleeping, rest, and any exertion. A stress trigger was assigned if the patient  
36 answered “yes” for at least one of following events within 24 hours preceding the episode: accident,  
37 recent diagnosis of disease, financial problems, and news of death/disease of a relative/friend.  
38  
39

40 Marital status was considered partnered for married patients or living in civil union. Education was  
41 recorded as completed years of schooling and classified into four categories: less than 4 (little formal  
42 education), 4 (elementary school), less than 12 (high school), and 12 or more years (secondary education  
43 or more). Occupations were classified into major professional groups, according to the Portuguese  
44  
45  
46  
47  
48  
49  
50  
51  
52  
53  
54  
55  
56  
57  
58  
59  
60

1  
2  
3 Classification of Occupations 2010,<sup>10</sup> integrated in the International Standard Classification of  
4 Occupations (ISCO/2008).  
5  
6  
7

### 8 **Definition of Variables**

9  
10 Although symptoms of ACS have been widely described, their value for diagnosis of ACS is not  
11 unanimously recognized.<sup>11-13</sup> After discussion with clinical cardiologists of our team, we opted to use  
12 Cardiology Societies' position papers to define direct and referred pain locations and to select symptoms  
13 to evaluate.<sup>14,15</sup> Direct pain location was classified as follows: 1) typical for retrosternal, precordial, right  
14 thoracic, or bilateral thoracic pain (chest pain); 2) atypical for epigastric pain or located in the back, left  
15 arm or shoulder, right arm or shoulder, neck, or jaw; and 3) a mixture when both typical and atypical  
16 locations were present. Referred pain location was considered as follows: 1) typical if pain referred to the  
17 left arm or shoulder, right arm or shoulder, neck, or jaw; 2) atypical if pain referred to retrosternal,  
18 precordial, right thoracic, bilateral thoracic, epigastric, or back regions; and 3) a mixture for referred pain  
19 in typical and atypical locations.  
20  
21  
22  
23  
24  
25  
26  
27

28 Patients rarely present with a single symptom during an episode of ACS, and present with multiple  
29 symptoms instead that do not occur in isolation and may cluster.<sup>16</sup> There has been increasing interest in  
30 symptom cluster analysis in cardiovascular disease because it aids in assessment by enhancing  
31 recognition of patients with similar symptom profiles.<sup>17</sup> Groups of symptoms other than pain were  
32 obtained by latent class analysis.  
33  
34  
35  
36

37 The small group of non-classified (NC) patients with ACS (patients with left bundle branch block) was  
38 grouped with patients with ST elevation myocardial infarction (STEMI) (STEMI/NC ACS group). Non-  
39 ST elevation ACS (NSTEMI) included unstable angina and non-ST elevation acute myocardial  
40 infarction or subacute myocardial infarction.  
41  
42  
43

44 Considering the possible association between coronary anatomy and clinical presentation, we grouped  
45 patients according to coronary angiography into five groups: managed conservatively; normal or near-  
46 normal coronary angiography; lesions exclusively in the anterior descending artery; lesions in the right  
47 and/or circumflex artery; and lesions in the left main coronary artery, three-vessel disease or disease both  
48 in the anterior descending artery and the right or circumflex artery.  
49  
50  
51  
52  
53

### 54 **Data Analysis**



1  
2  
3 Continuous variables are expressed as mean and standard deviation or as median and interquartile range  
4 (IQR). Categorical variables are shown as number and percentage. To compare differences between  
5  
6 women and men, the chi-square or Fisher's test was used for categorical variables and the t-test for  
7  
8 continuous variables. Latent class analysis was used to identify distinct groups of individuals from a  
9  
10 sample (clusters) who were homogeneous within the group. This was based on the fact that performance  
11  
12 of an individual in a set of items is explained by a categorical latent variable with K classes (clusters),  
13  
14 commonly called latent classes. The number of latent clusters was defined according to the Akaike  
15  
16 information criterion (AIC). Starting from one single cluster and increasing one cluster at each step, the  
17  
18 best solution was identified when an increase in the number of clusters did not lead to a decrease in the  
19  
20 AIC.

21  
22 Logistic regression was used to identify variables associated with clinical presentation. Variables with  
23  
24  $p < 0.15$  for a crude association with the endpoint were entered in the initial model and a backward strategy  
25  
26 was used to exclude the least significant variables, based on Wald tests. We were then able to obtain the  
27  
28 most parsimonious model with all the important determinants. Sex, age, and type of ACS were forced to  
29  
30 remain in the model. All analyses were performed using STATA version 11.1 for Windows (Stata Corp  
31  
32 LP, College Station, TX) and R version 2.12.1 (R Foundation for Statistical Computing, Vienna, Austria).

## 33 RESULTS

### 34 Baseline characteristics

35  
36  
37  
38 Women (n=227, 26.0%) were older (69.1 vs 64.0 years,  $p < 0.001$ ) and more frequently lived in the interior  
39  
40 region (52.4% vs 38.7%,  $p < 0.001$ ) than men. Women were more often treated conservatively and had  
41  
42 normal or near normal coronary arteries more frequently than men. In this sample, no difference by sex  
43  
44 was observed in the type of ACS, where 56.6% of the patients had a discharge diagnosis of NSTEMI  
45  
46 (Table 1).

47  
48 Women more frequently had hypertension (81.5% vs 62.7%,  $p < 0.001$ ) and diabetes (38.8% vs 29.9%,  
49  
50  $p = 0.014$ ), and were more frequently obese (25.5% vs 18.5%,  $p = 0.020$ ) and never smokers compared with  
51  
52 men ( $p < 0.001$ , Table 1). Men were submitted to percutaneous coronary intervention more often than  
53  
54 women. There were no significant differences in a previous history of renal failure, prior myocardial  
55  
56 infarction, prior coronary artery bypass surgery, prior heart failure, and dementia by sex (Table 1).

1  
2  
3 Women were more likely to be unpartnered, disabled, less educated, and had a lower income compared  
4 with men. The median time that elapsed between admission and application of the symptom questionnaire  
5 was slightly longer in women than in men (Table 1).  
6  
7  
8  
9  
10  
11  
12  
13  
14  
15  
16  
17  
18  
19  
20  
21  
22  
23  
24  
25  
26  
27  
28  
29  
30  
31  
32  
33  
34  
35  
36  
37  
38  
39  
40  
41  
42  
43  
44  
45  
46  
47  
48  
49  
50  
51  
52  
53  
54  
55  
56  
57  
58  
59  
60

For peer review only

**Table 1. Baseline demographic, socioeconomic and clinical characteristics in the whole sample and by sex\***

|                                           | <b>Total<br/>(n = 873)</b> | <b>Women<br/>(n = 227)</b> | <b>Men<br/>(n = 646)</b> | <b>p</b> |
|-------------------------------------------|----------------------------|----------------------------|--------------------------|----------|
| Age (years), mean (SD)                    | 64.0 (13.0)                | 69.1 (12.7)                | 62.2 (12.7)              | <0.001   |
| <b>Socioeconomic</b>                      |                            |                            |                          |          |
| Marital status                            |                            |                            |                          |          |
| Partnered                                 | 667 (76.8)                 | 133 (58.9)                 | 534 (83.2)               | <0.001   |
| Education                                 |                            |                            |                          |          |
| Little formal education                   | 172 (19.9)                 | 95 (42.4)                  | 77 (12.0)                |          |
| Elementary school                         | 337 (39.1)                 | 73 (32.6)                  | 264 (41.3)               |          |
| High school                               | 213 (24.7)                 | 32 (14.3)                  | 181 (28.3)               |          |
| Secondary education or more               | 141 (16.3)                 | 24 (10.7)                  | 117 (18.3)               | <0.001   |
| Employment status                         |                            |                            |                          |          |
| Employed/looking after home               | 282 (32.6)                 | 64 (28.3)                  | 218 (34.1)               |          |
| Unemployed                                | 107 (12.4)                 | 16 (7.1)                   | 91 (14.2)                |          |
| Retired                                   | 334 (38.6)                 | 93 (41.2)                  | 241 (37.7)               |          |
| Disabled                                  | 143 (16.5)                 | 53 (23.5)                  | 90 (14.1)                | <0.001   |
| Subjective social class                   |                            |                            |                          |          |
| Low                                       | 281 (32.2)                 | 81 (35.7)                  | 200 (31.0)               |          |
| Lower-middle                              | 281 (32.2)                 | 58 (25.6)                  | 223 (34.5)               |          |
| Higher-middle/High                        | 60 (6.9)                   | 16 (7.1)                   | 44 (6.8)                 |          |
| No response                               | 251 (28.8)                 | 72 (31.7)                  | 179 (27.7)               | 0.097    |
| Household income (euros)                  |                            |                            |                          |          |
| <500                                      | 204 (23.4)                 | 77 (33.9)                  | 127 (19.7)               |          |
| 501-1000                                  | 276 (31.6)                 | 60 (26.4)                  | 216 (33.4)               |          |
| 1001 – 2000                               | 146 (16.7)                 | 22 (9.7)                   | 124 (19.2)               |          |
| >2000                                     | 88 (10.1)                  | 14 (6.2)                   | 74 (11.5)                |          |
| No response                               | 159 (18.2)                 | 54 (23.8)                  | 105 (16.3)               | <0.001   |
| Region                                    |                            |                            |                          |          |
| Metropolitan area of Porto                | 504 (57.7)                 | 108 (47.6)                 | 396 (61.3)               |          |
| North-eastern region of Portugal          | 369 (42.3)                 | 119 (52.4)                 | 250 (38.7)               | <0.001   |
| <b>Cardiovascular risk factors</b>        |                            |                            |                          |          |
| Smoking habit                             |                            |                            |                          |          |
| Never                                     | 369 (42.3)                 | 184 (81.0)                 | 185 (28.6)               |          |
| Current                                   | 283 (32.4)                 | 34 (15.0)                  | 249 (38.5)               |          |
| Former                                    | 221 (25.3)                 | 9 (4.0)                    | 212 (32.8)               | <0.001   |
| Hypertension                              | 590 (67.6)                 | 185 (81.5)                 | 405 (62.7)               | <0.001   |
| Diabetes mellitus                         | 281 (32.2)                 | 88 (38.8)                  | 193 (29.9)               | 0.014    |
| Dyslipidaemia                             | 535 (61.4)                 | 144 (63.4)                 | 391 (60.6)               | 0.454    |
| BMI (kg/m <sup>2</sup> )                  |                            |                            |                          |          |
| Median (IQR)                              | 26.5 (18.0-44.6)           | 26.7 (19.5-37.9)           | 26.4 (18.2-39.2)         | 0.531    |
| Underweight                               | 11 (1.4)                   | 2 (0.9)                    | 9 (1.5)                  |          |
| Normal weight                             | 272 (33.4)                 | 80 (37.0)                  | 192 (32.1)               |          |
| Overweight                                | 366 (44.9)                 | 79 (36.6)                  | 287 (47.9)               |          |
| Obese                                     | 166 (20.4)                 | 55 (25.5)                  | 111 (18.5)               | 0.020    |
| Family history of CVD                     | 303 (34.7)                 | 73 (32.2)                  | 230 (35.6)               | 0.105    |
| <b>Previous medical history</b>           |                            |                            |                          |          |
| Renal failure                             | 64 (7.3)                   | 14 (6.1)                   | 50 (7.7)                 | 0.434    |
| Myocardial infarction                     | 156 (17.9)                 | 34 (15.0)                  | 122 (18.9)               | 0.186    |
| PCI                                       | 100 (12.4)                 | 18 (8.4)                   | 82 (13.8)                | 0.041    |
| CABG                                      | 34 (4.2)                   | 5 (2.3)                    | 29 (4.9)                 | 0.111    |
| Heart failure                             | 63 (7.5)                   | 21 (9.6)                   | 42 (6.8)                 | 0.172    |
| Dementia                                  | 7 (0.8)                    | 4 (1.8)                    | 3 (0.5)                  | 0.060    |
| <b>ACS type</b>                           |                            |                            |                          |          |
| STEMI/NC ACS                              | 379 (43.4)                 | 101 (44.5)                 | 278 (43.0)               |          |
| NSTEMACS                                  | 494 (56.6)                 | 126 (55.5)                 | 368 (57.0)               | 0.703    |
| <b>Coronary anatomy</b>                   |                            |                            |                          |          |
| Normal or near normal                     | 57 (6.9)                   | 22 (10.6)                  | 35 (5.6)                 |          |
| Left anterior descending artery only      | 162 (19.5)                 | 38 (18.3)                  | 124 (19.9)               |          |
| Right and/or circumflex artery only       | 196 (23.6)                 | 46 (22.1)                  | 150 (24.0)               |          |
| Mixture                                   | 417 (50.1)                 | 102 (49.0)                 | 315 (50.5)               |          |
| Not submitted to coronary angiography     | 41 (4.7)                   | 19 (8.4)                   | 22 (3.4)                 | 0.004    |
| <b>Symptom questionnaire application</b>  |                            |                            |                          |          |
| Time from admission (hours), median (IQR) | 42.1 (25.0-68.0)           | 45.4 (28.5-72.3)           | 40.0 (24-67.4)           | 0.052    |

\*Values are number and percentage unless otherwise indicated.

ACS, acute coronary syndrome; BMI, body mass index; CABG, coronary artery bypass surgery; CVD, cardiovascular diseases; IQR, interquartile range; NSTEMACS, non-ST elevation acute coronary syndrome; PCI, percutaneous coronary intervention; SD, standard deviation; STEMI/NC ACS, ST elevation myocardial infarction/non-classifiable acute coronary syndrome.

### Symptom characteristics by sex and age

Because differences in symptoms by sex and age were similar in direction and magnitude in STEMI/NC ACS and NSTEMI/ACS (Supplementary Tables 1 and 2), both types of ACS were analysed together.

Although pain was present in most patients, men presented with pain more frequently than did women (97.4% vs 94.3%,  $p=0.028$ ), with no significant difference by age group in both sexes (Table 2). No difference was found in the location of pain by sex. Approximately 80% of patients felt chest pain (typical pain). Older women presented less frequently with chest pain and had chest pain and pain in other locations (mixture group) more often than did younger women ( $p=0.014$ ). Referred pain was observed more frequently in women and in younger patients (only significant for men,  $p=0.024$ ). Atypical and mixture referred pain were more frequent in women than in men ( $p<0.001$ ), mainly in women aged  $\geq 65$  years ( $p=0.009$ ). Women felt pain with higher intensity than did men (median [IQR]: 9 [8–10] vs 8 [6–9],  $p<0.001$ ), without a difference by age (Table 2). Women presented with symptoms other than pain more frequently than did men (82.8% vs 68.9%,  $p<0.001$ ), with no difference by age group in both sexes (Table 2).

Considering symptoms other than pain, the AIC optimum value supported a preference for a three-cluster solution (AIC 7207.508, 6869.390, 6862.476, and 6870.372 for one, two, three, and four clusters, respectively). Cluster 1 had low endorsement probabilities for all items (no symptoms cluster). Cluster 2 had a high probability for dyspnoea at rest and sweating, and a low probability for the remaining items (dyspnoea and sweating cluster). Cluster 3 had high probabilities for all items (multiple symptoms cluster). This three-cluster model made sense conceptually to cardiologists of our team. Clusters counts and probabilities of occurrence of symptoms in established clusters are shown in Supplementary Table 3. Differences in proportions of women and men in the three clusters were observed ( $p<0.001$ , Table 2). Cluster 1 was the most prevalent, in which men presented with the no symptoms cluster more frequently (76.9% vs 62.6%) and the multiple symptoms cluster less frequently (4.8% vs 15.9%) than did women. The proportion of dyspnoea and sweating cluster was similar in men and women (Table 2).

Approximately 45% of patients were at rest and 35% were under physical effort at the beginning of the episode. Older women were more frequently at rest at the beginning of the episode and younger women were more frequently under effort ( $p=0.011$ ). Less than 10% of patients identified a stressful event in the previous 24 hours, with no difference by sex, but among men, a younger age was slightly associated with this trigger ( $p=0.045$ , Table 2)

Table 2. Clinical presentation of patients with acute coronary syndrome, by sex and age\*

|                                      | Women      |           |            |           |             | P <sup>†</sup> | Men       |            |            |           |            | P <sup>†</sup> | P <sup>#</sup> |
|--------------------------------------|------------|-----------|------------|-----------|-------------|----------------|-----------|------------|------------|-----------|------------|----------------|----------------|
|                                      | <=45       | 46-64     | 65-79      | >=80      | Total       |                | <=45      | 46-64      | 65-79      | >=80      | Total      |                |                |
| <b>Total</b>                         | 14 (6.2)   | 54 (23.8) | 109 (48.0) | 50 (22.0) | 227 (100.0) |                | 61 (9.4)  | 303 (46.9) | 220 (34.1) | 62 (9.6)  | 646 (100)  |                |                |
| <b>Pain</b>                          | 14 (100.0) | 52 (96.3) | 104 (95.4) | 44 (88.0) | 214 (94.3)  | 0.229          | 60 (98.4) | 297 (98.0) | 214 (97.3) | 58 (93.5) | 629 (97.4) | 0.228          | 0.028          |
| <b>Pain location<sup>†</sup></b>     |            |           |            |           |             |                |           |            |            |           |            |                |                |
| <b>Typical</b>                       | 12 (85.7)  | 43 (82.7) | 88 (85.4)  | 32 (72.7) | 175 (82.2)  |                | 53 (89.8) | 246 (83.7) | 175 (82.2) | 44 (75.9) | 518 (83.0) |                |                |
| <b>Atypical</b>                      | 1 (7.1)    | 9 (17.3)  | 5 (4.9)    | 6 (13.6)  | 17 (8.0)    |                | 3 (5.1)   | 33 (11.2)  | 30 (14.1)  | 10 (17.2) | 76 (12.2)  |                |                |
| <b>Mixture</b>                       | 1 (7.1)    | 0 (0.0)   | 10 (9.7)   | 6 (13.6)  | 17 (8.0)    | 0.014          | 3 (5.1)   | 15 (5.1)   | 8 (3.8)    | 4 (6.9)   | 30 (4.8)   | 0.327          | 0.165          |
| <b>Referred pain</b>                 | 9 (64.3)   | 41 (78.8) | 72 (69.2)  | 25 (56.8) | 147 (68.7)  | 0.129          | 38 (63.3) | 179 (60.3) | 126 (58.9) | 23 (39.7) | 366 (58.2) | 0.024          | 0.007          |
| <b>Radiation type<sup>‡</sup></b>    |            |           |            |           |             |                |           |            |            |           |            |                |                |
| <b>Typical</b>                       | 8 (88.9)   | 20 (48.8) | 28 (38.9)  | 7 (28.0)  | 63 (42.9)   |                | 28 (73.7) | 114 (64.4) | 67 (53.2)  | 10 (43.5) | 219 (60.2) |                |                |
| <b>Atypical</b>                      | 0 (0.0)    | 13 (31.7) | 18 (25.0)  | 13 (52.0) | 44 (29.9)   |                | 7 (18.4)  | 37 (20.9)  | 39 (31.0)  | 8 (34.8)  | 91 (25.0)  |                |                |
| <b>Mixture</b>                       | 1 (11.1)   | 8 (19.5)  | 26 (36.1)  | 5 (20.0)  | 40 (27.2)   | 0.009          | 3 (7.9)   | 26 (14.7)  | 20 (15.9)  | 5 (21.7)  | 54 (14.8)  | 0.104          | <0.001         |
| <b>Pain intensity<sup>§</sup></b>    | 9.5 (8-10) | 9 (8-10)  | 9 (8-9)    | 8 (8-9)   | 9 (8-10)    | 0.170          | 8 (7-10)  | 8 (6-9)    | 8 (6-9)    | 8 (7-9)   | 8 (6-9)    | 0.095          | <0.001         |
| <b>Symptom</b>                       | 11 (78.6)  | 45 (83.3) | 91 (83.5)  | 41 (82.0) | 188 (82.8)  | 0.947          | 43 (70.5) | 209 (69.0) | 151 (68.6) | 42 (67.7) | 445 (68.9) | 0.989          | <0.001         |
| <b>Symptom clusters<sup>  </sup></b> |            |           |            |           |             |                |           |            |            |           |            |                |                |
| <b>Cluster 1</b>                     | 7 (50.0)   | 41 (75.9) | 62 (56.9)  | 32 (64.0) | 142 (62.6)  |                | 43 (70.5) | 232 (76.6) | 170 (77.3) | 52 (83.9) | 497 (76.9) |                |                |
| <b>Cluster 2</b>                     | 5 (35.7)   | 8 (14.8)  | 28 (25.7)  | 8 (16.0)  | 49 (21.6)   |                | 15 (25.6) | 59 (19.5)  | 35 (15.9)  | 9 (14.5)  | 118 (18.3) |                |                |
| <b>Cluster 3</b>                     | 2 (14.3)   | 5 (9.3)   | 19 (17.4)  | 10 (20.0) | 36 (15.9)   | 0.183          | 3 (4.9)   | 12 (4.0)   | 15 (6.8)   | 1 (1.61)  | 31 (4.80)  | 0.345          | <0.001         |
| <b>Activity</b>                      |            |           |            |           |             |                |           |            |            |           |            |                |                |
| <b>Sleep</b>                         | 2 (15.4)   | 16 (32.0) | 11 (10.4)  | 7 (14.9)  | 36 (16.7)   |                | 6 (9.8)   | 65 (21.7)  | 35 (16.1)  | 13 (21.3) | 119 (18.6) |                |                |
| <b>Rest</b>                          | 5 (38.5)   | 18 (36.0) | 50 (47.2)  | 29 (61.7) | 102 (47.2)  |                | 34 (55.7) | 124 (41.3) | 105 (48.2) | 33 (54.1) | 296 (46.3) |                |                |
| <b>Exertion</b>                      | 6 (46.2)   | 16 (32.0) | 45 (42.5)  | 11 (23.4) | 78 (36.1)   | 0.011          | 21 (34.4) | 111 (37.0) | 78 (35.8)  | 15 (24.6) | 225 (35.2) | 0.087          | 0.816          |
| <b>Stress trigger</b>                | 2 (14.3)   | 6 (11.1)  | 11 (10.2)  | 3 (6.1)   | 22 (9.8)    | 0.700          | 11 (18.0) | 23 (7.7)   | 15 (6.9)   | 6 (9.8)   | 55 (8.6)   | 0.045          | 0.605          |

\*Values are number and percentage unless otherwise indicated. †Pain location: Typical - retrosternal, precordial, right thoracic, or bilateral thoracic; Atypical - epigastric, back, left arm or shoulder, right arm or shoulder, neck, or jaw; Mixture - typical and atypical location. ‡Radiation type: Typical - left arm or shoulder, right arm or shoulder, neck, or jaw; Atypical: retrosternal, precordial, right thoracic, bilateral thoracic, epigastric, or back regions; Mixture: typical and atypical irradiation. §Median (interquartile range). ||Symptom clusters: cluster 1 (no symptom cluster) - low endorsement probabilities for all items; cluster 2 (dyspnoea and sweating cluster) - high probability for dyspnoea at rest and sweating; cluster 3 (multiple symptoms cluster) - high probabilities for all items. †p for age differences within each sex; #p for differences between sexes.

### Multivariate models

There were no differences in the adjusted pain frequency and location between men and women. Referred pain was more likely to be experienced by women (adjusted odds ratio [OR] 1.91, 95% confidence interval [95% CI] 1.33-2.74). Moreover, women had more than double the chance of having pain radiating to typical and atypical locations (2.25, 1.32-3.84) and of feeling pain with an intensity higher than 8 (2.77, 1.88-4.08) (Table 3).

The presence of at least one symptom other than pain occurred almost two times more often in women than in men. With cluster 1 as the reference, cluster 2 and 3 were positively associated with female sex, with the latter being statistically significant. The multiple symptoms cluster was almost 4-fold more likely in women than in men (3.92, 2.21-6.98) (Table 3).

No difference in the type of patients' activities at the beginning of the episode by sex was observed (Table 3).

**Table 3. Differences between women and men in clinical presentation of acute coronary syndrome**  
(men are the reference class).

| <b>Symptoms</b>                             | <b>OR</b> | <b>95% CI</b> | <b>Adjusted for</b>                                                                        |
|---------------------------------------------|-----------|---------------|--------------------------------------------------------------------------------------------|
| <b>Pain</b>                                 | 0.61      | 0.26-1.42     | Age, type of ACS, marital status, dyslipidaemia, CABG                                      |
| <b>Pain location*</b>                       |           |               |                                                                                            |
| <b>Typical</b>                              | 1         | (Reference)   |                                                                                            |
| <b>Atypical</b>                             | 0.63      | 0.35-1.13     | Age, type of ACS, coronary anatomy, region, smoking, dyslipidaemia, previous heart failure |
| <b>Mixture</b>                              | 0.94      | 0.44-1.98     | Age, type of ACS, coronary anatomy, region, smoking, dyslipidaemia, previous heart failure |
| <b>Referred pain</b>                        | 1.91      | 1.33-2.74     | Age, type of ACS, coronary anatomy, region, income, social class, previous renal failure.  |
| <b>Radiation type†</b>                      |           |               |                                                                                            |
| <b>Typical</b>                              | 1         | (Reference)   |                                                                                            |
| <b>Atypical</b>                             | 1.32      | 0.81-2.14     | Age, type of ACS, employment status, region                                                |
| <b>Mixture</b>                              | 2.25      | 1.32-3.84     | Age, type of ACS, employment status, region                                                |
| <b>Pain intensity</b><br>(higher than 8/10) | 2.77      | 1.88-4.08     | Age, type of ACS, coronary anatomy, education, professional group, previous AMI            |
| <b>Symptoms</b>                             | 1.95      | 1.30-2.93     | Age, type of ACS, region, previous AMI, previous heart failure                             |
| <b>Symptom clusters‡</b>                    |           |               |                                                                                            |
| <b>Cluster 1</b>                            | 1         | (Reference)   |                                                                                            |
| <b>Cluster 2</b>                            | 1.43      | 0.94-2.17     | Age, type of ACS, professional group, region, previous AMI                                 |
| <b>Cluster 3</b>                            | 3.92      | 2.21-6.98     | Age, type of ACS, professional group, region, previous AMI                                 |
| <b>Activity group</b>                       |           |               |                                                                                            |
| <b>Sleeping</b>                             | 1         | (Reference)   |                                                                                            |
| <b>Rest</b>                                 | 1.09      | 0.69-1.72     | Age, type of ACS, previous heart failure                                                   |
| <b>Exertion</b>                             | 1.25      | 0.78-2.02     | Age, type of ACS, previous heart failure                                                   |

ACS, acute coronary syndrome; AMI, acute myocardial infarction; CI, confidence interval; OR, odds ratio.

\*Pain location: Typical - retrosternal, precordial, right thoracic, or bilateral thoracic; Atypical - epigastric, back, left arm or shoulder, right arm or shoulder, neck, or jaw; Mixture - typical and atypical location.

†Radiation type: Typical - left arm or shoulder, right arm or shoulder, neck, or jaw; Atypical: retrosternal, precordial, right thoracic, bilateral thoracic, epigastric, or back regions; Mixture: typical and atypical irradiation.

‡Symptom clusters: cluster 1 (no symptom cluster) - low endorsement probabilities for all items; cluster 2 (dyspnoea and sweating cluster) - high probability for dyspnoea at rest and sweating; cluster 3 (multiple symptoms cluster) - high probabilities for all items.

## DISCUSSION

In our study, no differences in the frequency and location of pain by sex were observed. Referred pain, pain radiating to typical and atypical locations, and pain of higher intensity were more likely to occur among women. Women were also more likely than men to present with symptoms other than pain. Three clusters of symptoms other than pain were identified. Women were more likely to present with the multiple symptoms cluster.

Differences between women and men in perception of symptoms of ACS might be explained by anatomical, physiological, biological, and psychosocial differences that influence each other.<sup>8,18</sup> We measured several variables of these different domains. Differences in symptom presentation by sex might be the result of differences in response to history-taking,<sup>9</sup> differences in neural receptors and pathways involved in pain, and subtle differences in the location and type of atherosclerotic lesions.<sup>19,20</sup> Our findings of similar ACS symptoms between women and men are consistent with previous studies,<sup>6,21</sup> as well as our finding that women are more likely to have atypical presentations.<sup>8</sup> We observed that women have a higher likelihood of atypical referred pain and of several concomitant symptoms other than pain, common to other cardiac and non-cardiac diagnoses.

In our study, chest pain was the most frequent symptom in both sexes, consistent with previous studies.<sup>22,23</sup> Among those with pain, typical chest pain was observed in 82% of patients, regardless of sex. The remaining patients had pain in less typical locations and were thus prone to misdiagnosis and undertreatment and, consequently, to worse outcomes.<sup>24</sup> Considering differences in characteristics of pain by sex, studies suggested that women, in particular older women, were less likely to have the chief complaint of chest pain associated with acute myocardial infarction.<sup>25</sup> Studies reported that chest pain did not differ between women and men,<sup>8</sup> others that women have pain in the neck and back more often than men,<sup>26,27</sup> without distinguishing between direct and referred pain. In our study, referred pain was observed in 61% of patients, it was more frequent in women, and typical referred pain was only observed in 33%. Notably, a study on diagnostic acuity of ACS symptoms showed that shoulder and arm pain was predictive of the diagnosis of ACS for women only.<sup>21</sup>

According to previous studies, with regard to other symptoms, a higher proportion of women have less typical symptoms than men.<sup>7,27</sup> Women have also reported other symptoms, such as indigestion, palpitations, nausea, numbness in the hands, and unusual fatigue, more frequently than men.<sup>8</sup> In our cohort, three symptom clusters were identified. Women had the multiple symptoms cluster more



1  
2 frequently than did men, characterized by high probabilities for all symptoms. According to Rosenfeld et  
3 al. women are more likely to cluster in a similar class, called the heavy symptom burden class.<sup>28</sup> With  
4 regard to ACS symptom clustering, there are contradictory findings on identified clusters, the proportion  
5 of patients per cluster, and differences between clusters regarding demographic factors. In our study,  
6 cluster 1 and 3 (low and high probabilities for all symptoms, respectively) are in line with observations of  
7 other settings.<sup>16,29</sup> A recent systematic review of symptom clusters in cardiovascular disease<sup>30</sup> identified  
8 clusters with the most symptoms and clusters with the lowest number of symptoms. Our dyspnoea and  
9 sweating cluster has two common symptoms with the Riegel et al.<sup>23</sup> stress symptoms cluster, which  
10 includes shortness of breath, sweating, nausea, indigestion, dread, and anxiety.

11 Methodological differences related to sampling and measuring might explain these different results.  
12 Strengths of our study include consecutive sampling, a questionnaire with detailed clinical information  
13 was systematically applied, and we adjusted for several confounding variables.

14 The value of symptoms for diagnosis of ACS varies across studies.<sup>11,12,31</sup> Overall, the diagnostic  
15 performance of chest pain characteristics for diagnosis is limited, with likelihood ratios close to 1.<sup>32</sup>  
16 Sensitivity for individual symptoms of ACS, using the 13-Item Acute Coronary Syndrome Checklist,  
17 ranges from 27% to 67% for women and 14% to 72% for men. Additionally, specificity ranges from 33%  
18 to 78% for women and 34% to 78% for men, with different associations between some symptoms and  
19 diagnosis of ACS by sex.<sup>21</sup> However, physicians still base the likelihood of ACS mainly on symptoms  
20 and use the electrocardiogram to rule in the diagnosis.<sup>33</sup> Evaluation of these patients is mostly unchanged,  
21 without implementation of evidence-based assessment tools in clinical practice to improve diagnostic  
22 accuracy. Public health messages should take into account the complexity of presenting symptoms of  
23 ACS, particularly the significant proportion of women and men with ACS without typical chest pain.  
24 Additionally, there is a higher likelihood of atypical referred pain and multiple concomitant symptoms in  
25 women. These factors should be accounted for to encourage timely and appropriate care of patients with  
26 ACS.

### 27 28 29 30 31 32 33 34 35 36 37 38 39 40 41 42 43 44 45 46 47 48 49 **Limitations**

50 Participants were interviewed as soon as possible after admission, but this does not obviate the  
51 retrospective nature of data collection. The results of this study are valid for stable patients and those that  
52 were able to answer the questionnaire in the acute phase of ACS. For patients who were eligible but not  
53  
54  
55  
56  
57  
58  
59  
60

1  
2  
3 enrolled only information on sex, age and type of ACS was available. Patients who died before the  
4 interview were older ( $81.5 \pm 11.8$  vs  $64.6 \pm 13.1$  years,  $p < 0.001$ ), were more often women (66.7% vs 26.0%,  
5  $p < 0.001$ ), and more frequently had a diagnosis of STEMI (81.3% vs 43.4%,  $p = 0.003$ ) than did  
6 participants. Patients who were discharged or transferred to another hospital before the interview had  
7 STEMI less often (25.0% vs 43.4%,  $p = 0.005$ ) and patients who were not enrolled because of clinical  
8 instability or inability to understand the questionnaire were older. Patients who refused to participate were  
9 older ( $72.7 \pm 11.0$  vs  $64.0 \pm 13.0$  years,  $p < 0.001$ ), were less often partnered (65.7% vs 76.8%,  $p = 0.036$ ), and  
10 had little formal education (43.1% vs 19.7%,  $p < 0.001$ ) compared with participants. Except for deceased  
11 patients, no difference in sex proportion was observed between participants and non-participants. We  
12 cannot exclude that some of the sex differences were caused by selection bias because of a higher risk of  
13 non-inclusion of women due to death in the early hours of admission. Considering that atypical  
14 presentation is associated with a worse prognosis, the proportion of patients with ACS presenting without  
15 typical chest pain or that of women with an atypical presentation could be even higher.<sup>24</sup>  
16  
17  
18  
19  
20  
21  
22  
23  
24  
25  
26  
27

## 28 CONCLUSION

29 This study shows no differences in the frequency and location of pain by sex, but approximately 20% of  
30 patients do not present with chest pain, regardless of sex. Women are more likely to report referred pain  
31 and multiple symptoms simultaneously. Health education messages should take into account the  
32 complexity of presentation of ACS and emphasize the possible non-chest location of pain in both sexes  
33 and the higher probability of concomitant symptoms other than pain in women. Further sex-stratified  
34 analysis of ACS presentation is required to determine the diagnostic accuracy of symptoms by sex.  
35  
36  
37  
38  
39  
40  
41  
42  
43  
44  
45  
46  
47  
48  
49  
50  
51  
52  
53  
54  
55  
56  
57  
58  
59  
60

1  
2  
3 **Funding:** This study was funded by FEDER through the Operational Programme Competitiveness and  
4 Internationalization and national funding from the Foundation for Science and Technology – FCT  
5 (Portuguese Ministry of Science, Technology and Higher Education) (FCOMP-01-0124-FEDER-  
6 028709), under the project “Inequalities in coronary heart disease management and outcomes in Portugal”  
7 (Ref. FCT PTDC/DTP-EPI/0434/2012) and Unidade de Investigação em Epidemiologia - Instituto de  
8 Saúde Pública da Universidade do Porto (EPIUnit) (POCI-01-0145-FEDER-006862;  
9 Ref.UID/DTP/04750/2013).

10  
11  
12  
13  
14  
15  
16  
17 **Conflicts of interest:** All authors have completed the ICMJE uniform disclosure form at  
18 [www.icmje.org/coi\\_disclosure.pdf](http://www.icmje.org/coi_disclosure.pdf) and declare: all authors had financial support through grants from the  
19 Foundation for Science and Technology – FCT (Portuguese Ministry of Science, Technology and Higher  
20 Education) and from Unidade de Investigação em Epidemiologia - Instituto de Saúde Pública da  
21 Universidade do Porto. No financial relationships with any organisations that might have an interest in the  
22 submitted work in the previous three years; no other relationships or activities that could appear to have  
23 influenced the submitted work.

### 31 **Contributors**

32  
33 Carla Araújo, Marta Viana and Ana Azevedo had the original idea to develop the EPIHeart cohort study  
34 and were responsible for acquiring the study grant. Carla Araújo raised the hypotheses, analysed and  
35 interpreted the data, and drafted the first version of the manuscript. Olga Laszczyńska, Milton Severo and  
36 Ana Azevedo analysed and interpreted the data. Marta Viana and Andreia Borges participated in data  
37 collection. All authors were involved in writing the paper and approved the final version of the submitted  
38 manuscript.

### 46 **Data sharing**

47 Data are available by email the corresponding author at [carla-r-araujo@hotmail.com](mailto:carla-r-araujo@hotmail.com).  
48  
49  
50  
51  
52  
53  
54  
55  
56  
57  
58  
59  
60

## References

1. Mendis S, Global Status Report on noncommunicable diseases 2014. Report, World Health Organization, 2014.
2. Nichols M, Townsend N, Scarborough P, et al. Cardiovascular disease in Europe 2014: epidemiological update. *Eur Heart J.* (2014); 35: 2929.
3. Canto JG, Rogers WJ, Goldberg RJ, et al. Association of age and sex with myocardial infarction symptom presentation and in-hospital mortality. *Jama.* (2012); 307: 813-22.
4. Doggen CJ, Zwerink M, Droste HM, et al. Prehospital paths and hospital arrival time of patients with acute coronary syndrome or stroke, a prospective observational study. *BMC Emerg Med.* (2016); 16: 3.
5. Annemans L, Danchin N, Van de Werf F, et al. Prehospital and in-hospital use of healthcare resources in patients surviving acute coronary syndromes: an analysis of the EPICOR registry. *Open Heart.* (2016); 3: e000347.
6. DeVon HA and Zerwic JJ. Symptoms of acute coronary syndromes: are there gender differences? A review of the literature. *Heart Lung.* (2002); 31: 235-45.
7. DeVon HA and Zerwic JJ. The symptoms of unstable angina: do women and men differ? *Nurs Res.* (2003); 52: 108-18.
8. DeVon HA, Ryan CJ, Ochs AL, et al. Symptoms across the continuum of acute coronary syndromes: differences between women and men. *Am J Crit Care.* (2008); 17: 14-24; quiz 5.
9. Safdar B, Nagurney JT, Anise A, et al. Gender-specific research for emergency diagnosis and management of ischemic heart disease: proceedings from the 2014 Academic Emergency Medicine Consensus Conference Cardiovascular Research Workgroup. *Acad Emerg Med.* (2014); 21: 1350-60.
10. Statistics Portugal. Portuguese Classification of Occupations 2010. [https://www.ine.pt/xportal/xmain?xpid=INE&xpgid=ine\\_publicacoes&PUBLICACOESpub\\_boui=107961853&PUBLICACOESmodo=2](https://www.ine.pt/xportal/xmain?xpid=INE&xpgid=ine_publicacoes&PUBLICACOESpub_boui=107961853&PUBLICACOESmodo=2), 2011 (accessed 15.11.16).
11. Swap CJ and Nagurney JT. Value and limitations of chest pain history in the evaluation of patients with suspected acute coronary syndromes. *Jama.* (2005); 294: 2623-9.
12. Elick GD. Usefulness of chest pain character and location as diagnostic indicators of an acute coronary syndrome. *Am J Cardiol.* (2005); 95: 1228-31.
13. Canto AJ, Kiefe CI, Goldberg RJ, et al. Differences in symptom presentation and hospital mortality according to type of acute myocardial infarction. *Am Heart J.* (2012); 163: 572-9.
14. Roffi M, Patrono C, Collet JP, et al. 2015 ESC Guidelines for the management of acute coronary syndromes in patients presenting without persistent ST-segment elevation: Task Force for the Management of Acute Coronary Syndromes in Patients Presenting without Persistent ST-Segment Elevation of the European Society of Cardiology (ESC). *Eur Heart J.* (2015).
15. Amsterdam EA, Wenger NK, Brindis RG, et al. 2014 AHA/ACC guideline for the management of patients with non-ST-elevation acute coronary syndromes: a report of the American College of Cardiology/American Heart Association Task Force on Practice Guidelines. *Circulation.* (2014); 130: e344-426.
16. Ryan CJ, DeVon HA, Horne R, et al. Symptom clusters in acute myocardial infarction: a secondary data analysis. *Nurs Res.* (2007); 56: 72-81.
17. Miaskowski C, Dodd M and Lee K. Symptom clusters: the new frontier in symptom management research. *J Natl Cancer Inst Monogr.* (2004): 17-21.
18. Legato MJ. Gender and the heart: sex-specific differences in normal anatomy and physiology. *J Gen Specif Med.* (2000); 3: 15-8.
19. Foreman RD. Mechanisms of cardiac pain. *Annu Rev Physiol.* (1999); 61: 143-67.
20. Arslanian-Engoren C and Engoren M. Physiological and anatomical bases for sex differences in pain and nausea as presenting symptoms of acute coronary syndromes. *Heart Lung.* (2010); 39: 386-93.

21. Devon HA, Rosenfeld A, Steffen AD, et al. Sensitivity, specificity, and sex differences in symptoms reported on the 13-item acute coronary syndrome checklist. *J Am Heart Assoc.* (2014); 3: e000586.
22. Arslanian-Engoren C, Patel A, Fang J, et al. Symptoms of men and women presenting with acute coronary syndromes. *Am J Cardiol.* (2006); 98: 1177-81.
23. Riegel B, Hanlon AL, McKinley S, et al. Differences in mortality in acute coronary syndrome symptom clusters. *Am Heart J.* (2010); 159: 392-8.
24. Brieger D, Eagle KA, Goodman SG, et al. Acute coronary syndromes without chest pain, an underdiagnosed and undertreated high-risk group: insights from the Global Registry of Acute Coronary Events. *Chest.* (2004); 126: 461-9.
25. Milner KA, Vaccarino V, Arnold AL, et al. Gender and age differences in chief complaints of acute myocardial infarction (Worcester Heart Attack Study). *Am J Cardiol.* (2004); 93: 606-8.
26. Everts B, Karlson BW, Wahrborg P, et al. Localization of pain in suspected acute myocardial infarction in relation to final diagnosis, age and sex, and site and type of infarction. *Heart Lung.* (1996); 25: 430-7.
27. Goldberg R, Goff D, Cooper L, et al. Age and sex differences in presentation of symptoms among patients with acute coronary disease: the REACT Trial. Rapid Early Action for Coronary Treatment. *Coron Artery Dis.* (2000); 11: 399-407.
28. Rosenfeld AG, Knight EP, Steffen A, et al. Symptom clusters in patients presenting to the emergency department with possible acute coronary syndrome differ by sex, age, and discharge diagnosis. *Heart Lung.* (2015); 44: 368-75.
29. Lindgren TG, Fukuoka Y, Rankin SH, et al. Cluster analysis of elderly cardiac patients' prehospital symptomatology. *Nurs Res.* (2008); 57: 14-23.
30. DeVon HA, Vuckovic K, Ryan CJ, et al. Systematic review of symptom clusters in cardiovascular disease. *European Journal of Cardiovascular Nursing.* (2016).
31. Bruyninckx R, Aertgeerts B, Bruyninckx P, et al. Signs and symptoms in diagnosing acute myocardial infarction and acute coronary syndrome: a diagnostic meta-analysis. *Br J Gen Pract.* (2008); 58: 105-11.
32. Rubini Gimenez M, Reiter M, Twerenbold R, et al. SEx-specific chest pain characteristics in the early diagnosis of acute myocardial infarction. *JAMA Internal Medicine.* (2014); 174: 241-9.
33. Kamali A, Soderholm M and Ekelund U. What decides the suspicion of acute coronary syndrome in acute chest pain patients? *BMC Emerg Med.* (2014); 14: 9.

Supplementary Table 1. Clinical presentation of patients with ST elevation myocardial infarction/non-classifiable acute coronary syndrome, by sex and age\*

|                                      | Women      |           |           |           |             | P <sup>†</sup> | Men        |            |           |             |            | P <sup>†</sup> | P <sup>#</sup> |
|--------------------------------------|------------|-----------|-----------|-----------|-------------|----------------|------------|------------|-----------|-------------|------------|----------------|----------------|
|                                      | ≤45        | 46-64     | 65-79     | ≥80       | Total       |                | ≤45        | 46-64      | 65-79     | ≥80         | Total      |                |                |
| <b>Total</b>                         | 6 (5.9)    | 22 (21.8) | 53 (52.5) | 20 (19.8) | 101 (100.0) |                | 37 (13.3)  | 144 (51.8) | 77 (27.7) | 20 (7.2)    | 278 (100)  |                |                |
| <b>Pain</b>                          | 6 (100.0)  | 21 (95.5) | 52 (98.1) | 16 (80.0) | 95 (94.1)   | 0.039          | 36 (97.3)  | 142 (98.6) | 73 (94.8) | 20 (100.0)  | 271 (97.5) | 0.338          | 0.106          |
| <b>Pain location<sup>†</sup></b>     |            |           |           |           |             |                |            |            |           |             |            |                |                |
| <b>Typical</b>                       | 5 (83.3)   | 17 (81.0) | 44 (84.6) | 9 (56.3)  | 75 (78.9)   |                | 31 (88.6)  | 120 (85.1) | 55 (76.4) | 13 (65.0)   | 219 (81.7) |                |                |
| <b>Atypical</b>                      | 1 (16.7)   | 4 (19.0)  | 2 (3.8)   | 5 (31.3)  | 12 (12.6)   |                | 1 (2.9)    | 17 (12.1)  | 14 (19.4) | 5 (25.0)    | 37 (13.8)  |                |                |
| <b>Mixture</b>                       | 0 (0.0)    | 0 (0.0)   | 6 (11.5)  | 2 (12.5)  | 8 (8.4)     | 0.021          | 3 (8.6)    | 4 (2.8)    | 3 (4.2)   | 2 (10.2)    | 12 (4.5)   | 0.032          | 0.347          |
| <b>Referred pain</b>                 | 4 (66.7)   | 18 (85.7) | 38 (73.1) | 8 (50.0)  | 68 (71.6)   | 0.114          | 24 (66.7)  | 90 (63.4)  | 51 (69.9) | 7 (35.0)    | 172 (63.5) | 0.038          | 0.152          |
| <b>Radiation type<sup>‡</sup></b>    |            |           |           |           |             |                |            |            |           |             |            |                |                |
| <b>Typical</b>                       | 3 (75.0)   | 8 (44.4)  | 17 (44.7) | 1 (12.5)  | 29 (42.6)   |                | 19 (79.2)  | 53 (59.6)  | 26 (51.0) | 3 (42.9)    | 101 (59.1) |                |                |
| <b>Atypical</b>                      | 0 (0.0)    | 5 (27.8)  | 10 (26.3) | 4 (50.0)  | 19 (27.9)   |                | 5 (20.8)   | 21 (23.6)  | 9 (17.6)  | 3 (42.9)    | 38 (22.2)  |                |                |
| <b>Mixture</b>                       | 1 (25.0)   | 5 (27.8)  | 11 (28.9) | 3 (37.5)  | 20 (29.4)   | 0.504          | 0 (0.0)    | 15 (16.9)  | 16 (31.4) | 1 (14.3)    | 32 (18.7)  | 0.018          | 0.060          |
| <b>Pain intensity<sup>§</sup></b>    | 9.5 (8-10) | 9 (8-10)  | 9 (8-10)  | 8.5 (8-9) | 9 (8-10)    | 0.784          | 9 (7.5-10) | 8 (7-10)   | 8 (6.5-9) | 7.5 (6.5-9) | 8 (7-10)   | 0.064          | <0.001         |
| <b>Symptom</b>                       | 5 (83.3)   | 20 (90.9) | 47 (88.7) | 17 (85.0) | 89 (88.1)   | 0.794          | 23 (62.2)  | 105 (72.9) | 61 (79.2) | 14 (70.0)   | 203 (73.0) | 0.283          | 0.002          |
| <b>Symptom clusters<sup>  </sup></b> |            |           |           |           |             |                |            |            |           |             |            |                |                |
| <b>Cluster 1</b>                     | 2 (33.3)   | 18 (81.8) | 27 (50.9) | 11 (55.0) | 58 (57.4)   |                | 26 (70.3)  | 102 (70.8) | 54 (70.1) | 16 (80.0)   | 198 (71.2) |                |                |
| <b>Cluster 2</b>                     | 3 (50.0)   | 2 (9.1)   | 16 (30.2) | 4 (20.0)  | 25 (24.8)   |                | 9 (24.3)   | 36 (25.0)  | 19 (24.7) | 3 (15.0)    | 67 (24.1)  |                |                |
| <b>Cluster 3</b>                     | 1 (16.7)   | 2 (9.1)   | 10 (18.9) | 5 (25.0)  | 18 (17.8)   | 0.132          | 2 (5.4)    | 6 (4.2)    | 4 (5.2)   | 1 (5.0)     | 13 (4.7)   | 0.967          | <0.001         |
| <b>Activity</b>                      |            |           |           |           |             |                |            |            |           |             |            |                |                |
| <b>Sleep</b>                         | 1 (16.7)   | 3 (14.3)  | 4 (7.8)   | 3 (15.8)  | 11 (11.3)   |                | 5 (13.5)   | 29 (20.1)  | 10 (13.0) | 4 (20.0)    | 48 (17.3)  |                |                |
| <b>Rest</b>                          | 3 (50.0)   | 9 (42.9)  | 22 (43.1) | 14 (73.7) | 48 (49.5)   |                | 19 (51.4)  | 65 (45.1)  | 43 (55.8) | 13 (65.0)   | 140 (50.4) |                |                |
| <b>Exertion</b>                      | 2 (33.3)   | 9 (42.9)  | 25 (49.0) | 2 (10.5)  | 38 (39.2)   | 0.069          | 13 (35.1)  | 50 (34.7)  | 24 (31.2) | 3 (15.0)    | 90 (32.4)  | 0.393          | 0.274          |
| <b>Stress trigger</b>                | 1 (16.7)   | 2 (9.1)   | 4 (7.5)   | 3 (15.8)  | 10 (10.0)   | 0.519          | 5 (13.5)   | 11 (7.7)   | 6 (7.9)   | 2 (10.0)    | 24 (8.7)   | 0.669          | 0.697          |

\*Values are number and percentage unless otherwise indicated. †Pain location: Typical - retrosternal, precordial, right thoracic, or bilateral thoracic; Atypical - epigastric, back, left arm or shoulder, right arm or shoulder, neck, or jaw; Mixture - typical and atypical location. ‡Radiation type: Typical - left arm or shoulder, right arm or shoulder, neck, or jaw; Atypical: retrosternal, precordial, right thoracic, bilateral thoracic, epigastric, or back regions; Mixture: typical and atypical irradiation. §Median (interquartile range). ||Symptom clusters: cluster 1 (no symptom cluster) - low endorsement probabilities for all items; cluster 2 (dyspnoea and sweating cluster) - high probability for dyspnoea at rest and sweating; cluster 3 (multiple symptoms cluster) - high probabilities for all items. ¶p for age differences within each sex; #p for differences between sexes.

Supplementary Table 2. Clinical presentation of patients with non-ST elevation acute coronary syndrome, by sex and age\*

|                           | Women        |            |           |           |            | P <sup>¶</sup> | Men        |            |            |           |            | P <sup>¶</sup> | P <sup>#</sup> |
|---------------------------|--------------|------------|-----------|-----------|------------|----------------|------------|------------|------------|-----------|------------|----------------|----------------|
|                           | <=45         | 46-64      | 65-79     | >=80      | Total      |                | <=45       | 46-64      | 65-79      | >=80      | Total      |                |                |
| <b>Total</b>              | 8 (6.3)      | 32 (25.4)  | 56 (44.4) | 30 (23.8) | 126 (100)  |                | 24 (6.5)   | 159 (43.2) | 143 (38.9) | 42 (11.4) | 368 (100)  |                |                |
| <b>Pain</b>               | 8 (100.0)    | 31 (96.9)  | 52 (92.9) | 28 (93.3) | 119 (94.4) | 0.864          | 24 (100.0) | 155 (97.5) | 141 (98.6) | 38 (90.5) | 358 (97.3) | 0.073          | 0.131          |
| <b>Pain location†</b>     |              |            |           |           |            |                |            |            |            |           |            |                |                |
| <b>Typical</b>            | 7 (87.5)     | 26 (83.9)  | 44 (86.3) | 23 (82.1) | 100 (84.7) |                | 22 (91.7)  | 126 (82.4) | 120 (85.1) | 31 (81.6) | 299 (84.0) |                |                |
| <b>Atypical</b>           | 0 (0.0)      | 5 (16.1)   | 3 (5.9)   | 1 (3.6)   | 9 (7.6)    |                | 2 (8.3)    | 16 (10.5)  | 16 (11.3)  | 5 (13.2)  | 39 (11.0)  |                |                |
| <b>Mixture</b>            | 1 (12.5)     | 0 (0.0)    | 4 (7.8)   | 4 (14.3)  | 9 (7.6)    | 0.172          | 0 (0.0)    | 11 (7.2)   | 5 (3.5)    | 2 (5.3)   | 18 (5.1)   | 0.778          | 0.367          |
| <b>Referred pain</b>      | 5 (62.5)     | 23 (74.2)  | 34 (65.4) | 17 (60.7) | 79 (66.4)  | 0.728          | 14 (58.3)  | 89 (57.4)  | 75 (53.2)  | 16 (42.1) | 194 (54.2) | 0.350          | 0.020          |
| <b>Radiation type‡</b>    |              |            |           |           |            |                |            |            |            |           |            |                |                |
| <b>Typical</b>            | 5 (100.0)    | 12 (52.2)  | 11 (32.4) | 6 (35.3)  | 34 (43.0)  |                | 9 (64.3)   | 61 (69.3)  | 41 (54.7)  | 7 (43.8)  | 118 (61.1) |                |                |
| <b>Atypical</b>           | 0 (0.0)      | 8 (34.8)   | 8 (23.5)  | 9 (52.9)  | 25 (31.6)  |                | 2 (14.3)   | 16 (18.2)  | 30 (40.0)  | 5 (31.3)  | 53 (27.5)  |                |                |
| <b>Mixture</b>            | 0 (0.0)      | 3 (13.0)   | 15 (44.1) | 2 (11.8)  | 20 (25.3)  | 0.008          | 3 (21.4)   | 11 (12.5)  | 4 (5.3)    | 4 (25.0)  | 22 (11.4)  | 0.007          | 0.005          |
| <b>Pain intensity§</b>    | 9.5 (8.5-10) | 9.5 (8-10) | 8 (8-10)  | 8 (7-9)   | 9 (8-10)   | 0.224          | 8 (6-9)    | 8 (6-9)    | 8 (6-9)    | 8 (7.5-9) | 8 (6-9)    | 0.200          | <0.001         |
| <b>Symptom</b>            | 6 (75.0)     | 25 (78.1)  | 44 (78.6) | 24 (80.0) | 99 (78.6)  | 0.992          | 20 (83.3)  | 104 (65.4) | 90 (62.9)  | 28 (66.7) | 242 (65.8) | 0.278          | 0.007          |
| <b>Symptom clusters  </b> |              |            |           |           |            |                |            |            |            |           |            |                |                |
| <b>Cluster 1</b>          | 5 (62.5)     | 23 (71.9)  | 35 (62.5) | 21 (70.0) | 84 (66.7)  |                | 17 (70.8)  | 130 (81.8) | 116 (81.1) | 36 (85.7) | 299 (81.3) |                |                |
| <b>Cluster 2</b>          | 2 (25.0)     | 6 (18.8)   | 12 (21.4) | 4 (13.3)  | 24 (19.1)  |                | 6 (25.0)   | 23 (14.5)  | 16 (11.2)  | 6 (14.3)  | 51 (13.9)  |                |                |
| <b>Cluster 3</b>          | 1 (12.5)     | 3 (9.4)    | 9 (16.1)  | 5 (16.7)  | 18 (14.3)  | 0.919          | 1 (4.2)    | 6 (3.8)    | 11 (7.7)   | 0 (0.0)   | 18 (4.9)   | 0.231          | <0.001         |
| <b>Activity</b>           |              |            |           |           |            |                |            |            |            |           |            |                |                |
| <b>Sleep</b>              | 1 (14.3)     | 13 (44.8)  | 7 (12.7)  | 4 (14.3)  | 25 (21.0)  |                | 1 (4.2)    | 36 (23.1)  | 25 (17.7)  | 9 (22.0)  | 71 (19.6)  |                |                |
| <b>Rest</b>               | 2 (28.6)     | 9 (31.0)   | 28 (50.9) | 15 (53.6) | 54 (45.4)  |                | 15 (62.5)  | 59 (37.8)  | 62 (44.0)  | 20 (48.8) | 156 (43.1) |                |                |
| <b>Exertion</b>           | 4 (57.1)     | 7 (24.1)   | 20 (36.4) | 9 (32.1)  | 40 (33.6)  | 0.032          | 8 (33.3)   | 61 (39.1)  | 54 (38.3)  | 12 (29.3) | 135 (37.3) | 0.180          | 0.768          |
| <b>Stress trigger</b>     | 1 (12.5)     | 4 (12.5)   | 7 (12.7)  | 0 (0.0)   | 12 (9.6)   | 0.140          | 6 (25.0)   | 12 (7.7)   | 9 (6.4)    | 4 (9.8)   | 31 (8.6)   | 0.044          | 0.731          |

\*Values are number and percentage unless otherwise indicated. †Pain location: Typical - retrosternal, precordial, right thoracic, or bilateral thoracic; Atypical - epigastric, back, left arm or shoulder, right arm or shoulder, neck, or jaw; Mixture - typical and atypical location. ‡Radiation type: Typical - left arm or shoulder, right arm or shoulder, neck, or jaw; Atypical: retrosternal, precordial, right thoracic, bilateral thoracic, epigastric, or back regions; Mixture: typical and atypical irradiation. §Median (interquartile range). ||Symptom clusters: cluster 1 (no symptom cluster) - low endorsement probabilities for all items; cluster 2 (dyspnoea and sweating cluster) - high probability for dyspnoea at rest and sweating; cluster 3 (multiple symptoms cluster) - high probabilities for all items. ¶p for age differences within each sex; #p for differences between sexes.

Supplementary Table 3. Marginal percentage of subjects with each symptom in each assigned cluster\*

|                                 | Symptom clusters                |                                 |                                |
|---------------------------------|---------------------------------|---------------------------------|--------------------------------|
|                                 | Cluster 1 <sup>*</sup><br>n=639 | Cluster 2 <sup>†</sup><br>n=167 | Cluster 3 <sup>‡</sup><br>n=67 |
| <b>Dyspnoea at rest</b>         | 17.4                            | 34.2                            | 37.3                           |
| <b>Exertional dyspnoea</b>      | 6.0                             | 2.1                             | 14.5                           |
| <b>Sweating</b>                 | 22.2                            | 89.6                            | 71.7                           |
| <b>Nausea and vomiting</b>      | 6.5                             | 9.7                             | 41.4                           |
| <b>Dizziness</b>                | 2.6                             | 18.0                            | 74.1                           |
| <b>Blurry vision</b>            | 0.6                             | 4.4                             | 27.5                           |
| <b>Presyncope</b>               | 1.3                             | 11.4                            | 42.7                           |
| <b>Syncope</b>                  | 1.6                             | 3.6                             | 10.5                           |
| <b>Palpitations</b>             | 0.3                             | 5.4                             | 19.5                           |
| <b>Weakness</b>                 | 7.5                             | 17.8                            | 64.4                           |
| <b>“Other symptoms”</b>         | 4.5                             | 5.5                             | 12.8                           |
| <b>Other digestive symptoms</b> | 1.0                             | 1.0                             | 1.4                            |
| <b>Discomfort</b>               | 1.3                             | 1.1                             | 4.2                            |

\*Values are percentages.

<sup>\*</sup> Cluster 1: no symptom cluster; <sup>†</sup> Cluster 2: dyspnoea and sweating cluster; <sup>‡</sup> Cluster 3: multiple symptoms cluster.



STROBE Statement—checklist of items : *Sex differences in presenting symptoms of acute coronary syndrome: the EPIHeart cohort study*

|                              | Item No | Recommendation                                                                                                                                                                                                                                                                                                                                                                                                                                                                                                                                                                                                                                                                                                                                                       |
|------------------------------|---------|----------------------------------------------------------------------------------------------------------------------------------------------------------------------------------------------------------------------------------------------------------------------------------------------------------------------------------------------------------------------------------------------------------------------------------------------------------------------------------------------------------------------------------------------------------------------------------------------------------------------------------------------------------------------------------------------------------------------------------------------------------------------|
| <b>Title and abstract</b>    | 1       | (a) Indicate the study's design with a commonly used term in the title or the abstract – <b>page 1 (title) and page 2 (abstract)</b><br>(b) Provide in the abstract an informative and balanced summary of what was done and what was found – <b>page 2</b>                                                                                                                                                                                                                                                                                                                                                                                                                                                                                                          |
| <b>Introduction</b>          |         |                                                                                                                                                                                                                                                                                                                                                                                                                                                                                                                                                                                                                                                                                                                                                                      |
| Background/rationale         | 2       | Explain the scientific background and rationale for the investigation being reported – <b>page 4</b>                                                                                                                                                                                                                                                                                                                                                                                                                                                                                                                                                                                                                                                                 |
| Objectives                   | 3       | State specific objectives, including any prespecified hypotheses - <b>page 4</b>                                                                                                                                                                                                                                                                                                                                                                                                                                                                                                                                                                                                                                                                                     |
| <b>Methods</b>               |         |                                                                                                                                                                                                                                                                                                                                                                                                                                                                                                                                                                                                                                                                                                                                                                      |
| Study design                 | 4       | Present key elements of study design early in the paper – <b>pages 4 and 5</b>                                                                                                                                                                                                                                                                                                                                                                                                                                                                                                                                                                                                                                                                                       |
| Setting                      | 5       | Describe the setting, locations, and relevant dates, including periods of recruitment, exposure, follow-up, and data collection – <b>pages 4-6</b>                                                                                                                                                                                                                                                                                                                                                                                                                                                                                                                                                                                                                   |
| Participants                 | 6       | <i>Cohort study</i> : Give the eligibility criteria, and the sources and methods of selection of participants – <b>pages 4 and 5</b>                                                                                                                                                                                                                                                                                                                                                                                                                                                                                                                                                                                                                                 |
| Variables                    | 7       | Clearly define all outcomes, exposures, predictors, potential confounders, and effect modifiers. Give diagnostic criteria, if applicable – <b>page 6</b>                                                                                                                                                                                                                                                                                                                                                                                                                                                                                                                                                                                                             |
| Data sources/<br>measurement | 8       | For each variable of interest, give sources of data and details of methods of assessment (measurement). Describe comparability of assessment methods if there is more than one group – <b>pages 5 and 6</b>                                                                                                                                                                                                                                                                                                                                                                                                                                                                                                                                                          |
| Bias                         | 9       | Describe any efforts to address potential sources of bias - <b>page 6</b>                                                                                                                                                                                                                                                                                                                                                                                                                                                                                                                                                                                                                                                                                            |
| Study size                   | 10      | Explain how the study size was arrived at – <b>page 4</b>                                                                                                                                                                                                                                                                                                                                                                                                                                                                                                                                                                                                                                                                                                            |
| Quantitative variables       | 11      | Explain how quantitative variables were handled in the analyses. If applicable, describe which groupings were chosen and why – <b>page 7</b>                                                                                                                                                                                                                                                                                                                                                                                                                                                                                                                                                                                                                         |
| Statistical methods          | 12      | (a) Describe all statistical methods, including those used to control for confounding - <b>page 7</b><br>(b) Describe any methods used to examine subgroups and interactions – <b>page 6</b><br>(c) Explain how missing data were addressed – <b>Patients who were unable to answer the questionnaire (with missing data on clinical presentation) were not included.</b><br>(d) <i>Cohort study</i> —If applicable, explain how loss to follow-up was addressed – <b>Not applicable.</b><br>(e) Describe any sensitivity analyses – <b>We analysed clinical presentation separately by type of acute coronary syndrome (Supplementary tables 1 and 2), but as results were similar by sex and age both types of acute coronary syndrome were analysed together.</b> |

Continued on next page

| <b>Results</b>           |    |                                                                                                                                                                                                                                                                                                                                                                                      |
|--------------------------|----|--------------------------------------------------------------------------------------------------------------------------------------------------------------------------------------------------------------------------------------------------------------------------------------------------------------------------------------------------------------------------------------|
| Participants             | 13 | (a) Report numbers of individuals at each stage of study—eg numbers potentially eligible, examined for eligibility, confirmed eligible, included in the study, completing follow-up, and analysed – <b>pages 4 and 5</b><br>(b) Give reasons for non-participation at each stage – <b>pages 4 and 5</b><br>(c) Consider use of a flow diagram – <b>Not necessary in our opinion.</b> |
| Descriptive data         | 14 | (a) Give characteristics of study participants (eg demographic, clinical, social) and information on exposures and potential confounders – <b>pages 7-9</b><br>(b) Indicate number of participants with missing data for each variable of interest – <b>page 9</b>                                                                                                                   |
| Outcome data             | 15 | <i>Cohort study</i> —Report numbers of outcome events or summary measures over time – <b>pages 10 and 11</b>                                                                                                                                                                                                                                                                         |
| Main results             | 16 | (a) Give unadjusted estimates and, if applicable, confounder-adjusted estimates and their precision (eg, 95% confidence interval). Make clear which confounders were adjusted for and why they were included – <b>pages 12 and 13</b><br>(b) Report category boundaries when continuous variables were categorized – <b>not applicable</b>                                           |
| Other analyses           | 17 | Report other analyses done—<br>eg analyses of subgroups and interactions, and sensitivity analyses – <b>not applicable</b>                                                                                                                                                                                                                                                           |
| <b>Discussion</b>        |    |                                                                                                                                                                                                                                                                                                                                                                                      |
| Key results              | 18 | Summarise key results with reference to study objectives – <b>page 14</b>                                                                                                                                                                                                                                                                                                            |
| Limitations              | 19 | Discuss limitations of the study, taking into account sources of potential bias or imprecision. Discuss both direction and magnitude of any potential bias – <b>pages 15 and 16</b>                                                                                                                                                                                                  |
| Interpretation           | 20 | Give a cautious overall interpretation of results considering objectives, limitations, multiplicity of analyses, results from similar studies, and other relevant evidence - <b>pages 14 and 15</b>                                                                                                                                                                                  |
| Generalisability         | 21 | Discuss the generalisability (external validity) of the study results – <b>page 15</b>                                                                                                                                                                                                                                                                                               |
| <b>Other information</b> |    |                                                                                                                                                                                                                                                                                                                                                                                      |
| Funding                  | 22 | Give the source of funding and the role of the funders for the present study and, if applicable, for the original study on which the present article is based – <b>page 17</b>                                                                                                                                                                                                       |

# BMJ Open

## Sex differences in presenting symptoms of acute coronary syndrome: the EPIHeart cohort study

|                                 |                                                                                                                                                                                                                                                                                                                                                                                                                                                                                                                                                                                                                                                                                                                                                                                                                                                                                                                                                                                                                                                                                                       |
|---------------------------------|-------------------------------------------------------------------------------------------------------------------------------------------------------------------------------------------------------------------------------------------------------------------------------------------------------------------------------------------------------------------------------------------------------------------------------------------------------------------------------------------------------------------------------------------------------------------------------------------------------------------------------------------------------------------------------------------------------------------------------------------------------------------------------------------------------------------------------------------------------------------------------------------------------------------------------------------------------------------------------------------------------------------------------------------------------------------------------------------------------|
| Journal:                        | <i>BMJ Open</i>                                                                                                                                                                                                                                                                                                                                                                                                                                                                                                                                                                                                                                                                                                                                                                                                                                                                                                                                                                                                                                                                                       |
| Manuscript ID                   | bmjopen-2017-018798.R1                                                                                                                                                                                                                                                                                                                                                                                                                                                                                                                                                                                                                                                                                                                                                                                                                                                                                                                                                                                                                                                                                |
| Article Type:                   | Research                                                                                                                                                                                                                                                                                                                                                                                                                                                                                                                                                                                                                                                                                                                                                                                                                                                                                                                                                                                                                                                                                              |
| Date Submitted by the Author:   | 18-Oct-2017                                                                                                                                                                                                                                                                                                                                                                                                                                                                                                                                                                                                                                                                                                                                                                                                                                                                                                                                                                                                                                                                                           |
| Complete List of Authors:       | Araújo, Carla; Universidade do Porto, EPIUnit-Instituto de Saúde Pública; Centro Hospitalar de Trás-os-Montes e Alto Douro, EPE, Cardiologia<br>Laszczyńska, Olga; Universidade do Porto, EPIUnit-Instituto de Saúde Pública<br>Viana, Marta; Universidade do Porto, EPIUnit-Instituto de Saúde Pública<br>Melão, Filipa; Centro Hospitalar São João, EPE, Cardiologia<br>Henriques, Ana; Universidade do Porto, EPIUnit-Instituto de Saúde Pública<br>Borges, Andreia; Universidade do Porto, EPIUnit-Instituto de Saúde Pública<br>Severo, Milton; Universidade do Porto, EPIUnit-Instituto de Saúde Pública; Faculdade de Medicina da Universidade do Porto, Departamento de Ciências da Saúde Pública e Forenses e Educação Médica<br>Maciel, Maria Júlia; Centro Hospitalar São João, EPE, Cardiologia<br>Moreira, Ilídio; Centro Hospitalar de Trás-os-Montes e Alto Douro, EPE, Cardiologia<br>Azevedo, Ana; Universidade do Porto, EPIUnit-Instituto de Saúde Pública; Faculdade de Medicina da Universidade do Porto, Departamento de Ciências da Saúde Pública e Forenses e Educação Médica |
| <b>Primary Subject Heading</b>: | Cardiovascular medicine                                                                                                                                                                                                                                                                                                                                                                                                                                                                                                                                                                                                                                                                                                                                                                                                                                                                                                                                                                                                                                                                               |
| Secondary Subject Heading:      | Diagnostics                                                                                                                                                                                                                                                                                                                                                                                                                                                                                                                                                                                                                                                                                                                                                                                                                                                                                                                                                                                                                                                                                           |
| Keywords:                       | Sex, Acute coronary syndrome, Women, Diagnosis                                                                                                                                                                                                                                                                                                                                                                                                                                                                                                                                                                                                                                                                                                                                                                                                                                                                                                                                                                                                                                                        |
|                                 |                                                                                                                                                                                                                                                                                                                                                                                                                                                                                                                                                                                                                                                                                                                                                                                                                                                                                                                                                                                                                                                                                                       |

SCHOLARONE™  
Manuscripts

1  
2  
3 **Sex differences in presenting symptoms of acute coronary syndrome: the EPIHeart cohort study**  
4  
5

6 Carla Araújo,<sup>1,2</sup> Olga Laszczyńska,<sup>1</sup> Marta Viana,<sup>1</sup> Filipa Melão,<sup>3</sup> Ana Henriques,<sup>1</sup> Andreia Borges,<sup>1</sup>  
7  
8 Milton Severo,<sup>1,4</sup> Maria Júlia Maciel,<sup>3</sup> Ilídio Moreira,<sup>2</sup> Ana Azevedo<sup>1,4</sup>  
9

10  
11 <sup>1</sup>EPIUnit - Instituto de Saúde Pública, Universidade do Porto, Portugal;

12  
13 <sup>2</sup>Serviço de Cardiologia, Centro Hospitalar de Trás-os-Montes e Alto Douro, EPE, Hospital de São Pedro,  
14  
15 Vila Real, Portugal;

16  
17 <sup>3</sup>Serviço de Cardiologia, Centro Hospitalar São João, EPE, Porto, Portugal;

18  
19 <sup>4</sup>Departamento de Ciências da Saúde Pública e Forenses e Educação Médica, Faculdade de Medicina da  
20  
21 Universidade do Porto, Portugal.  
22

23  
24  
25 **Correspondence:**

26 Carla Araújo

27 Instituto de Saúde Pública da Universidade do Porto

28 Rua das Taipas nº135

29 4050-600 Porto

30 Telephone: +351 222061820 Fax: +351 222061821 Email: [carla-r-araujo@hotmail.com](mailto:carla-r-araujo@hotmail.com)  
31  
32  
33  
34  
35  
36  
37  
38  
39  
40  
41  
42  
43  
44  
45  
46  
47  
48  
49  
50  
51  
52  
53  
54  
55  
56  
57  
58  
59  
60

## ABSTRACT

**Objectives:** Prompt diagnosis of acute coronary syndrome (ACS) remains a challenge, with presenting symptoms affecting the diagnosis algorithm and, consequently, management and outcomes. This study aimed to identify sex differences in presenting symptoms of ACS.

**Design:** Data were collected within a prospective cohort study (EPIHeart).

**Setting:** Patients with confirmed diagnosis of type 1 (primary spontaneous) ACS who were consecutively admitted to the Cardiology Department of two tertiary hospitals in Portugal between August 2013 and December 2014.

**Participants:** Presenting symptoms of 873 patients (227 women) were obtained through a face-to-face interview.

**Outcome measures:** Typical pain was defined according to the definition of cardiology societies. Clusters of symptoms other than pain were identified by latent class analysis. Logistic regression was used to quantify differences in presentation of ACS symptoms by sex.

**Results:** Chest pain was reported by 82% of patients, with no differences in frequency or location between sexes. Women were more likely to feel pain with an intensity higher than 8/10 and this association was stronger for patients under 65 years old (interaction  $p=0.028$ ). Referred pain was also more likely in women, particularly pain referred to typical and atypical locations simultaneously. The multiple symptoms cluster, which was characterized by a high probability of presenting with all symptoms, was almost 4-fold more prevalent in women (3.92, 2.21–6.98). Presentation with this cluster was associated with a higher 30-day mortality rate adjusted for the GRACE 2.0 risk score (4.9% vs 0.9% for the two other clusters,  $p<0.001$ ).

**Conclusions:** While there are no significant differences in the frequency or location of pain between sexes, women are more likely to feel pain of higher intensity and to present with referred pain and symptoms other than pain. Knowledge of these ACS presentation profiles is important for health policy decisions and clinical practice.

Keywords: Sex; acute coronary syndrome; women; diagnosis.

**Strengths and limitations**

Within a prospective cohort study, presenting symptoms of acute coronary syndrome were obtained through a structured questionnaire applied within the first 48 hours after admission.

Consecutive sampling, the detailed clinical information obtained through the questionnaire and adjustment for several confounding variables strengthens our results.

The results of this study are valid for stable patients admitted to the hospital and who were able to answer the questionnaire in the acute phase of the acute coronary syndrome.

Some of the sex differences in presenting symptoms may be influenced by selection bias because of a higher risk of non-inclusion of women due to misdiagnosis or death in the early hours of admission.

## INTRODUCTION

Acute coronary syndrome (ACS) is still one of the main causes of death worldwide and in Europe.<sup>1, 2</sup> Coronary heart disease mortality has decreased in the last decades in developed countries because of primary prevention and improvement in treatment of patients with ACS.<sup>2</sup> Attainment of the maximal benefit of treatment of these patients is threatened by delayed diagnosis, partly dependent on clinical suspicion of ACS. The subjective experience of symptoms influences patients' attitudes in seeking help and professionals' interpretation of clinical presentations.<sup>3</sup> Early recognition of ACS may be challenging because while patients with presumed ACS have contact with healthcare providers,<sup>4</sup> many patients do not have an electrocardiogram before hospitalization.<sup>5</sup> Therefore, physicians frequently have to make decisions that are only clinically based.

The population of patients with atypical ACS presentation is still not well characterized.<sup>6</sup> Women and men generally have the same type of symptoms during an ACS episode, although the proportion presenting with different combinations of symptoms varies.<sup>7</sup> This conflicting evidence can be partly explained by the diverse methodology used, with few prospective studies, usually without a specific questionnaire. In prospective studies, small convenience samples were used and confounding was not always adequately addressed.<sup>8, 9</sup> Therefore, sex-specific research on ACS presentation is a challenge and priority.<sup>10</sup>

This study aimed to analyse sex differences in presenting symptoms of ACS within a prospective cohort study, taking into account the contribution of age, socioeconomic data, previous history of coronary heart disease, risk factors, comorbidities, type of ACS and coronary anatomy to the presenting symptoms.

## METHODS

### Study Design and Sample Selection

The EPIHeart cohort study was designed to identify inequalities in management and outcomes of patients with ACS. This study included all consecutive patients who were admitted between August 2013 and December 2014 to the Cardiology Department of two tertiary hospitals in two regions in northern Portugal (Hospital de São João, Porto, covering the metropolitan area of Porto in the coast; and Hospital de São Pedro, Vila Real, covering the interior, northeastern region). Eligible patients were 18 years old or older who lived in the catchment area of these hospitals (districts: Porto, Vila Real, Bragança, and Viseu),

1  
2  
3 with confirmed diagnosis of type 1 (primary spontaneous) ACS. The diagnosis of type 1 ACS and the  
4 classification in different subtypes was determined by the treating cardiologist, based on symptoms and  
5 signs at presentation, electrocardiogram findings and the increase in cardiac enzyme levels (high-  
6 sensitivity troponin I or T were used), according to the third universal definition of myocardial  
7 infarction.<sup>11</sup> The patients were also expected to be hospitalized for at least 48 hours and not  
8 institutionalized before the event. Of 1297 patients initially considered, in 164 the diagnosis of type 1  
9 ACS was not confirmed, 60 were excluded due to discharge or transfer before the interview, 18 died  
10 before being invited, and 44 were unable to answer the questionnaire because of clinical instability, no  
11 understanding of Portuguese, hearing problems, or cognitive impairment. Seventy-two patients refused to  
12 participate. For this analysis, we excluded 61 patients who were not admitted because of a symptom  
13 (patients referred by a doctor, after a scheduled appointment or diagnostic exam), four with vasospastic  
14 angina, and one illicit drug user. A total of 873 patients were included (Figure 1). The study protocol was  
15 in compliance with the principles of the Declaration of Helsinki and was approved by the Ethics  
16 Committee of both hospitals (*Comissão de Ética para a Saúde do Centro Hospitalar de S. João* and  
17 *Comissão de Ética do Centro Hospitalar de Trás-os-Montes e Alto Douro*, reference numbers of the  
18 approvals: 82/13 and 1286, respectively). All patients gave written informed consent.

### 33 **Procedures and data collection**

34 Presenting symptoms were obtained face-to-face using a structured questionnaire applied by trained  
35 interviewers, within the first 48 hours after admission, whenever possible. Over the following days, a  
36 second interview was conducted to collect data on sociodemographic characteristics and risk factors.  
37 Medical records were reviewed to extract data regarding previous medical history, admission information,  
38 and clinical data during hospitalization.

39 Pain, referred pain, and symptoms other than pain were measured dichotomously (yes/no). For the  
40 location of pain (direct and referred) patients were asked to point out where pain was occurring. To  
41 measure the intensity of pain, a 10-point scale (0, no pain; 10, pain of maximal intensity) was used.  
42 Symptoms other than pain included dyspnoea at rest, exertional dyspnoea, sweating, nausea, vomiting,  
43 dizziness, blurry vision, presyncope, syncope, palpitation, weakness, and an open-ended question of  
44 “other” (12 items). Answers to the last item enabled identification of two other relatively frequent  
45 symptoms, other digestive symptoms and discomfort. Activity at the onset of the episode was measured



1  
2  
3 dichotomously, including sleeping, rest, and any exertion. A stress trigger was assigned if the patient  
4 answered “yes” for at least one of following events within 24 hours preceding the episode: accident,  
5 recent diagnosis of disease, financial problems, and news of death/disease of a relative/friend.  
6

7  
8 Marital status was considered partnered for married patients or living in civil union. Education was  
9 recorded as completed years of schooling and classified into four categories: less than 4 (little formal  
10 education), 4 (elementary school), less than 12 (high school), and 12 or more years (secondary education  
11 or more). Occupations were classified into major professional groups, according to the Portuguese  
12 Classification of Occupations 2010,<sup>12</sup> integrated in the International Standard Classification of  
13 Occupations (ISCO/2008).  
14  
15  
16  
17  
18

### 19 20 21 **Definition of Variables**

22 Although symptoms of ACS have been widely described, their value for diagnosis of ACS is not  
23 unanimously recognized.<sup>13-15</sup> After discussion with clinical cardiologists of our team, we opted to use  
24 Cardiology Societies’ position papers to define direct and referred pain locations and to select symptoms  
25 to evaluate.<sup>16, 17</sup> Direct pain location was classified as follows: 1) typical for retrosternal, precordial, right  
26 thoracic, or bilateral thoracic pain (chest pain); 2) atypical for epigastric pain or located in the back, left  
27 arm or shoulder, right arm or shoulder, neck, or jaw; and 3) a mixture when both typical and atypical  
28 locations were present. Referred pain location was considered as follows: 1) typical if pain referred to the  
29 left arm or shoulder, right arm or shoulder, neck, or jaw; 2) atypical if pain referred to retrosternal,  
30 precordial, right thoracic, bilateral thoracic, epigastric, or back regions; and 3) a mixture for referred pain  
31 in typical and atypical locations.  
32  
33  
34  
35  
36  
37  
38  
39

40 Patients rarely present with a single symptom during an episode of ACS, and present with multiple  
41 symptoms instead that do not occur in isolation and may cluster.<sup>18</sup> There has been increasing interest in  
42 symptom cluster analysis in cardiovascular disease because it aids in assessment by enhancing  
43 recognition of patients with similar symptom profiles.<sup>19</sup> Groups of symptoms other than pain were  
44 obtained by latent class analysis.  
45  
46  
47  
48

49 The small group of non-classified (NC) patients with ACS (patients with left bundle branch block) was  
50 grouped with patients with ST elevation myocardial infarction (STEMI) (STEMI/NC ACS group). Non-  
51 ST elevation ACS (NSTEMI) included unstable angina and non-ST elevation acute myocardial  
52 infarction or subacute myocardial infarction.  
53  
54  
55  
56  
57  
58  
59  
60

1  
2  
3 Considering the possible association between coronary anatomy and clinical presentation, we grouped  
4 patients according to coronary angiography into five groups: managed conservatively; non-obstructive  
5 coronary artery disease; lesions exclusively in the anterior descending artery; lesions in the right and/or  
6 circumflex artery; and lesions in the left main coronary artery, three-vessel disease or disease both in the  
7 anterior descending artery and the right or circumflex artery.  
8  
9  
10

### 11 12 13 **Data Analysis**

14  
15 Continuous variables are expressed as mean and standard deviation or as median and interquartile range  
16 (IQR). Categorical variables are shown as number and percentage. To compare differences between  
17 women and men, and by age-groups, the chi-square or Fisher's test was used for categorical variables and  
18 the t-test, Mann-Whitney or Kruskal-Wallis tests for continuous variables. Latent class analysis was used  
19 to identify distinct groups of individuals from a sample (clusters) who were homogeneous within the  
20 group. This was based on the fact that performance of an individual in a set of items is explained by a  
21 categorical latent variable with K classes (clusters), commonly called latent classes. The number of latent  
22 clusters was defined according to the Akaike information criterion (AIC). Starting from one single cluster  
23 and increasing one cluster at each step, the best solution was identified when an increase in the number of  
24 clusters did not lead to a decrease in the AIC.  
25  
26  
27  
28  
29  
30  
31  
32

33 Patient and system delays, severity indicators, risk stratification using calculated GRACE and CRUSADE  
34 risk scores, left ventricular systolic dysfunction and 30-day mortality rate adjusted for the GRACE 2.0  
35 risk score,<sup>20</sup> were assessed according to presence of typical (chest) pain and cluster of symptoms other  
36 pain. The 30-day mortality adjusted for the GRACE 2.0 risk score was estimated based on predicted  
37 probabilities derived from logistic regression. Logistic regression was used to identify variables associated  
38 with clinical presentation. Variables with  $p < 0.15$  for a crude association with the endpoint were entered in  
39 the initial model and a backward strategy was used to exclude the least significant variables, based on  
40 Wald tests. We were then able to obtain the most parsimonious model with all the important  
41 determinants. Previous data support significant interaction between age and sex with clinical presentation,  
42 attenuated with advancing age, mainly in those 65 years old or older.<sup>3</sup> We assessed for effect measure  
43 modification by stratifying adjusted analyses based on two age groups (under 65 and 65 years old or  
44 older). Sex, age (continuous), and type of ACS were forced to remain in the models.  
45  
46  
47  
48  
49  
50  
51  
52  
53  
54  
55  
56  
57  
58  
59  
60

1  
2  
3 All analyses were performed using STATA version 11.1 for Windows (Stata Corp LP, College Station,  
4 TX) and R version 2.12.1 (R Foundation for Statistical Computing, Vienna, Austria).  
5  
6  
7  
8  
9

## 10 **RESULTS**

### 13 **Baseline characteristics**

14  
15 Women (n=227, 26.0%) were older (69.1 vs 62.2 years,  $p<0.001$ ) and more frequently lived in the interior  
16 region (52.4% vs 38.7%,  $p<0.001$ ) than men. Women were more often treated conservatively and had  
17 non-obstructive coronary artery disease more frequently than men. In this sample, no difference by sex  
18 was observed in the type of ACS, where 56.6% of the patients had a discharge diagnosis of NSTEMI  
19 (Table 1).  
20  
21  
22  
23

24 Women more frequently had hypertension (81.5% vs 62.7%,  $p<0.001$ ) and diabetes (38.8% vs 29.9%,  
25  $p=0.014$ ), and were more frequently obese (25.5% vs 18.5%,  $p=0.020$ ) and never smokers compared with  
26 men ( $p<0.001$ , Table 1). Men were submitted to percutaneous coronary intervention more often than  
27 women. There were no significant differences in a previous history of renal failure, prior myocardial  
28 infarction, prior coronary artery bypass surgery, prior heart failure, and dementia by sex (Table 1).  
29  
30  
31  
32

33 Women were more likely to be unpartnered, disabled, less educated, and had a lower income compared  
34 with men. The median time that elapsed between admission and application of the symptom questionnaire  
35 was slightly longer in women than in men (Table 1).  
36  
37  
38  
39  
40  
41  
42  
43  
44  
45  
46  
47  
48  
49  
50  
51  
52  
53  
54  
55  
56  
57  
58  
59  
60

**Table 1. Baseline demographic, socioeconomic and clinical characteristics in the whole sample and by sex\***

|                                           | <b>Total<br/>(n = 873)</b> | <b>Women<br/>(n = 227)</b> | <b>Men<br/>(n = 646)</b> | <b>p</b> |
|-------------------------------------------|----------------------------|----------------------------|--------------------------|----------|
| <b>Age</b> (years), mean (SD)             | 64.0 (13.0)                | 69.1 (12.7)                | 62.2 (12.7)              | <0.001   |
| <b>Socioeconomic</b>                      |                            |                            |                          |          |
| Marital status                            |                            |                            |                          |          |
| Partnered                                 | 667 (76.8)                 | 133 (58.9)                 | 534 (83.2)               | <0.001   |
| Education                                 |                            |                            |                          |          |
| Little formal education                   | 172 (19.9)                 | 95 (42.4)                  | 77 (12.0)                |          |
| Elementary school                         | 337 (39.1)                 | 73 (32.6)                  | 264 (41.3)               |          |
| High school                               | 213 (24.7)                 | 32 (14.3)                  | 181 (28.3)               |          |
| Secondary education or more               | 141 (16.3)                 | 24 (10.7)                  | 117 (18.3)               | <0.001   |
| Employment status                         |                            |                            |                          |          |
| Employed/looking after home               | 282 (32.6)                 | 64 (28.3)                  | 218 (34.1)               |          |
| Unemployed                                | 107 (12.4)                 | 16 (7.1)                   | 91 (14.2)                |          |
| Retired                                   | 334 (38.6)                 | 93 (41.2)                  | 241 (37.7)               |          |
| Disabled                                  | 143 (16.5)                 | 53 (23.5)                  | 90 (14.1)                | <0.001   |
| Subjective social class                   |                            |                            |                          |          |
| Low                                       | 281 (32.2)                 | 81 (35.7)                  | 200 (31.0)               |          |
| Lower-middle                              | 281 (32.2)                 | 58 (25.6)                  | 223 (34.5)               |          |
| Higher-middle/High                        | 60 (6.9)                   | 16 (7.1)                   | 44 (6.8)                 |          |
| No response                               | 251 (28.8)                 | 72 (31.7)                  | 179 (27.7)               | 0.097    |
| Household income (euros)                  |                            |                            |                          |          |
| <500                                      | 204 (23.4)                 | 77 (33.9)                  | 127 (19.7)               |          |
| 501-1000                                  | 276 (31.6)                 | 60 (26.4)                  | 216 (33.4)               |          |
| 1001 – 2000                               | 146 (16.7)                 | 22 (9.7)                   | 124 (19.2)               |          |
| >2000                                     | 88 (10.1)                  | 14 (6.2)                   | 74 (11.5)                |          |
| No response                               | 159 (18.2)                 | 54 (23.8)                  | 105 (16.3)               | <0.001   |
| Region                                    |                            |                            |                          |          |
| Metropolitan area of Porto                | 504 (57.7)                 | 108 (47.6)                 | 396 (61.3)               |          |
| North-eastern region of Portugal          | 369 (42.3)                 | 119 (52.4)                 | 250 (38.7)               | <0.001   |
| <b>Cardiovascular risk factors</b>        |                            |                            |                          |          |
| Smoking habit                             |                            |                            |                          |          |
| Never                                     | 369 (42.3)                 | 184 (81.0)                 | 185 (28.6)               |          |
| Current                                   | 283 (32.4)                 | 34 (15.0)                  | 249 (38.5)               |          |
| Former                                    | 221 (25.3)                 | 9 (4.0)                    | 212 (32.8)               | <0.001   |
| Hypertension                              | 590 (67.6)                 | 185 (81.5)                 | 405 (62.7)               | <0.001   |
| Diabetes mellitus                         | 281 (32.2)                 | 88 (38.8)                  | 193 (29.9)               | 0.014    |
| Dyslipidaemia                             | 535 (61.4)                 | 144 (63.4)                 | 391 (60.6)               | 0.454    |
| BMI (kg/m <sup>2</sup> )                  |                            |                            |                          |          |
| Median (IQR)                              | 26.5 (18.0-44.6)           | 26.7 (19.5-37.9)           | 26.4 (18.2-39.2)         | 0.531    |
| Underweight                               | 11 (1.4)                   | 2 (0.9)                    | 9 (1.5)                  |          |
| Normal weight                             | 272 (33.4)                 | 80 (37.0)                  | 192 (32.1)               |          |
| Overweight                                | 366 (44.9)                 | 79 (36.6)                  | 287 (47.9)               |          |
| Obese                                     | 166 (20.4)                 | 55 (25.5)                  | 111 (18.5)               | 0.020    |
| Family history of CVD                     | 303 (34.7)                 | 73 (32.2)                  | 230 (35.6)               | 0.105    |
| <b>Previous medical history</b>           |                            |                            |                          |          |
| Renal failure                             | 64 (7.3)                   | 14 (6.1)                   | 50 (7.7)                 | 0.434    |
| Myocardial infarction                     | 156 (17.9)                 | 34 (15.0)                  | 122 (18.9)               | 0.186    |
| PCI                                       | 100 (12.4)                 | 18 (8.4)                   | 82 (13.8)                | 0.041    |
| CABG                                      | 34 (4.2)                   | 5 (2.3)                    | 29 (4.9)                 | 0.111    |
| Heart failure                             | 63 (7.5)                   | 21 (9.6)                   | 42 (6.8)                 | 0.172    |
| Dementia                                  | 7 (0.8)                    | 4 (1.8)                    | 3 (0.5)                  | 0.060    |
| <b>ACS type</b>                           |                            |                            |                          |          |
| STEMI/NC ACS                              | 379 (43.4)                 | 101 (44.5)                 | 278 (43.0)               |          |
| NSTEMACS                                  | 494 (56.6)                 | 126 (55.5)                 | 368 (57.0)               | 0.703    |
| <b>Coronary anatomy</b>                   |                            |                            |                          |          |
| Non-obstructive disease                   | 57 (6.9)                   | 22 (10.6)                  | 35 (5.6)                 |          |
| Left anterior descending artery only      | 162 (19.5)                 | 38 (18.3)                  | 124 (19.9)               |          |
| Right and/or circumflex artery only       | 196 (23.6)                 | 46 (22.1)                  | 150 (24.0)               |          |
| Mixture                                   | 417 (50.1)                 | 102 (49.0)                 | 315 (50.5)               |          |
| Not submitted to coronary angiography     | 41 (4.7)                   | 19 (8.4)                   | 22 (3.4)                 | 0.004    |
| <b>Symptom questionnaire application</b>  |                            |                            |                          |          |
| Time from admission (hours), median (IQR) | 42.1 (25.0-68.0)           | 45.4 (28.5-72.3)           | 40.0 (24.0-67.4)         | 0.052    |

\*Values are number and percentage unless otherwise indicated.

ACS, acute coronary syndrome; BMI, body mass index; CABG, coronary artery bypass surgery; CVD, cardiovascular diseases; IQR, interquartile range; NSTEMACS, non-ST elevation acute coronary syndrome; PCI, percutaneous coronary intervention; SD, standard deviation; STEMI/NC ACS, ST elevation myocardial infarction/non-classifiable acute coronary syndrome.

### Symptom characteristics by sex and age

Because differences in symptoms by sex and age were similar in direction and magnitude in STEMI/NC ACS and NSTEMI/ACS (Supplementary Tables 1 and 2), both types of ACS were analysed together.

Although pain was present in most patients, men presented with pain more frequently than did women (97.4% vs 94.3%,  $p=0.028$ ), with a higher sex difference among patients with 80 or more years old (88.0% vs 93.5%). Older patients presented less often pain, but the difference by age group in both sexes was not significant (Table 2). No difference was found in the location of pain by sex. Approximately 80% of patients felt chest pain (typical pain). Older women presented less frequently with chest pain and had chest pain and pain in other locations (mixture group) more often than did younger women ( $p=0.014$ ). Referred pain was observed more frequently in women and in younger patients (only significant for men,  $p=0.024$ ); again in the older age group, the difference between women and men was notorious (56.8% vs 39.7%, respectively). Atypical and mixture referred pain were more frequent in women than in men ( $p<0.001$ ), mainly in women aged  $\geq 65$  years ( $p=0.009$ ). Women felt pain with higher intensity than did men (median [IQR]: 9 [8–10] vs 8 [6–9],  $p<0.001$ ), without a difference by age (Table 2). Women presented with symptoms other than pain more frequently than did men (82.8% vs 68.9%,  $p<0.001$ ), with no difference by age group in both sexes (Table 2).

Considering symptoms other than pain, the AIC optimum value supported a preference for a three-cluster solution (AIC 7207.508, 6869.390, 6862.476, and 6870.372 for one, two, three, and four clusters, respectively). Cluster 1 had low endorsement probabilities for all items (no symptoms cluster). Cluster 2 had a high probability for dyspnoea at rest and sweating, and a low probability for the remaining items (dyspnoea and sweating cluster). Cluster 3 had high probabilities for all items (multiple symptoms cluster). This three-cluster model made sense conceptually to cardiologists of our team. Clusters counts and probabilities of occurrence of symptoms in established clusters are shown in Supplementary Table 3. Differences in proportions of women and men in the three clusters were observed ( $p<0.001$ , Table 2). Cluster 1 was the most prevalent, in which men presented with the no symptoms cluster more frequently (76.9% vs 62.6%) and the multiple symptoms cluster less frequently (4.8% vs 15.9%) than did women. Higher differences of multiple symptoms cluster proportions between women and men were observed among patients in the older age group. The proportion of dyspnoea and sweating cluster was similar in men and women (Table 2).

1  
2  
3 Approximately 45% of patients were at rest and 35% were under physical effort at the beginning of the  
4 episode. Older women were more frequently at rest at the beginning of the episode and younger women  
5 were more frequently under effort ( $p=0.011$ ). Less than 10% of patients identified a stressful event in the  
6 previous 24 hours, with no difference by sex, but among men, a younger age was slightly associated with  
7 this trigger ( $p=0.045$ , Table 2).  
8  
9  
10  
11  
12  
13  
14  
15  
16  
17  
18  
19  
20  
21  
22  
23  
24  
25  
26  
27  
28  
29  
30  
31  
32  
33  
34  
35  
36  
37  
38  
39  
40  
41  
42  
43  
44  
45  
46  
47  
48  
49  
50  
51  
52  
53  
54  
55  
56  
57  
58  
59  
60

For peer review only

Table 2. Clinical presentation of patients with acute coronary syndrome, by sex and age\*

|                                      | Women      |           |            |           |             | P <sup>†</sup> | Men       |            |            |           |            | P <sup>†</sup> | P <sup>#</sup> |
|--------------------------------------|------------|-----------|------------|-----------|-------------|----------------|-----------|------------|------------|-----------|------------|----------------|----------------|
|                                      | <=45       | 46-64     | 65-79      | >=80      | Total       |                | <=45      | 46-64      | 65-79      | >=80      | Total      |                |                |
| <b>Total</b>                         | 14 (6.2)   | 54 (23.8) | 109 (48.0) | 50 (22.0) | 227 (100.0) |                | 61 (9.4)  | 303 (46.9) | 220 (34.1) | 62 (9.6)  | 646 (100)  |                |                |
| <b>Pain</b>                          | 14 (100.0) | 52 (96.3) | 104 (95.4) | 44 (88.0) | 214 (94.3)  | 0.229          | 60 (98.4) | 297 (98.0) | 214 (97.3) | 58 (93.5) | 629 (97.4) | 0.228          | 0.028          |
| <b>Pain location<sup>†</sup></b>     |            |           |            |           |             |                |           |            |            |           |            |                |                |
| <b>Typical</b>                       | 12 (85.7)  | 43 (82.7) | 88 (85.4)  | 32 (72.7) | 175 (82.2)  |                | 53 (89.8) | 246 (83.7) | 175 (82.2) | 44 (75.9) | 518 (83.0) |                |                |
| <b>Atypical</b>                      | 1 (7.1)    | 9 (17.3)  | 5 (4.9)    | 6 (13.6)  | 17 (8.0)    | 0.014          | 3 (5.1)   | 33 (11.2)  | 30 (14.1)  | 10 (17.2) | 76 (12.2)  | 0.327          | 0.165          |
| <b>Mixture</b>                       | 1 (7.1)    | 0 (0.0)   | 10 (9.7)   | 6 (13.6)  | 17 (8.0)    |                | 3 (5.1)   | 15 (5.1)   | 8 (3.8)    | 4 (6.9)   | 30 (4.8)   |                |                |
| <b>Referred pain</b>                 | 9 (64.3)   | 41 (78.8) | 72 (69.2)  | 25 (56.8) | 147 (68.7)  | 0.129          | 38 (63.3) | 179 (60.3) | 126 (58.9) | 23 (39.7) | 366 (58.2) | 0.024          | 0.007          |
| <b>Radiation type<sup>‡</sup></b>    |            |           |            |           |             |                |           |            |            |           |            |                |                |
| <b>Typical</b>                       | 8 (88.9)   | 20 (48.8) | 28 (38.9)  | 7 (28.0)  | 63 (42.9)   | 0.009          | 28 (73.7) | 114 (64.4) | 67 (53.2)  | 10 (43.5) | 219 (60.2) | 0.104          | <0.001         |
| <b>Atypical</b>                      | 0 (0.0)    | 13 (31.7) | 18 (25.0)  | 13 (52.0) | 44 (29.9)   |                | 7 (18.4)  | 37 (20.9)  | 39 (31.0)  | 8 (34.8)  | 91 (25.0)  |                |                |
| <b>Mixture</b>                       | 1 (11.1)   | 8 (19.5)  | 26 (36.1)  | 5 (20.0)  | 40 (27.2)   |                | 3 (7.9)   | 26 (14.7)  | 20 (15.9)  | 5 (21.7)  | 54 (14.8)  |                |                |
| <b>Pain intensity<sup>§</sup></b>    | 9.5 (8-10) | 9 (8-10)  | 9 (8-9)    | 8 (8-9)   | 9 (8-10)    | 0.170          | 8 (7-10)  | 8 (6-9)    | 8 (6-9)    | 8 (7-9)   | 8 (6-9)    | 0.095          | <0.001         |
| <b>Symptom</b>                       | 11 (78.6)  | 45 (83.3) | 91 (83.5)  | 41 (82.0) | 188 (82.8)  | 0.947          | 43 (70.5) | 209 (69.0) | 151 (68.6) | 42 (67.7) | 445 (68.9) | 0.989          | <0.001         |
| <b>Symptom clusters<sup>  </sup></b> |            |           |            |           |             |                |           |            |            |           |            |                |                |
| <b>Cluster 1</b>                     | 7 (50.0)   | 41 (75.9) | 62 (56.9)  | 32 (64.0) | 142 (62.6)  | 0.183          | 43 (70.5) | 232 (76.6) | 170 (77.3) | 52 (83.9) | 497 (76.9) | 0.345          | <0.001         |
| <b>Cluster 2</b>                     | 5 (35.7)   | 8 (14.8)  | 28 (25.7)  | 8 (16.0)  | 49 (21.6)   |                | 15 (25.6) | 59 (19.5)  | 35 (15.9)  | 9 (14.5)  | 118 (18.3) |                |                |
| <b>Cluster 3</b>                     | 2 (14.3)   | 5 (9.3)   | 19 (17.4)  | 10 (20.0) | 36 (15.9)   |                | 3 (4.9)   | 12 (4.0)   | 15 (6.8)   | 1 (1.61)  | 31 (4.80)  |                |                |
| <b>Activity</b>                      |            |           |            |           |             |                |           |            |            |           |            |                |                |
| <b>Sleep</b>                         | 2 (15.4)   | 16 (32.0) | 11 (10.4)  | 7 (14.9)  | 36 (16.7)   | 0.011          | 6 (9.8)   | 65 (21.7)  | 35 (16.1)  | 13 (21.3) | 119 (18.6) | 0.087          | 0.816          |
| <b>Rest</b>                          | 5 (38.5)   | 18 (36.0) | 50 (47.2)  | 29 (61.7) | 102 (47.2)  |                | 34 (55.7) | 124 (41.3) | 105 (48.2) | 33 (54.1) | 296 (46.3) |                |                |
| <b>Exertion</b>                      | 6 (46.2)   | 16 (32.0) | 45 (42.5)  | 11 (23.4) | 78 (36.1)   |                | 21 (34.4) | 111 (37.0) | 78 (35.8)  | 15 (24.6) | 225 (35.2) |                |                |
| <b>Stress trigger</b>                | 2 (14.3)   | 6 (11.1)  | 11 (10.2)  | 3 (6.1)   | 22 (9.8)    | 0.700          | 11 (18.0) | 23 (7.7)   | 15 (6.9)   | 6 (9.8)   | 55 (8.6)   | 0.045          | 0.605          |

\*Values are number and percentage unless otherwise indicated. †Pain location: Typical - retrosternal, precordial, right thoracic, or bilateral thoracic; Atypical - epigastric, back, left arm or shoulder, right arm or shoulder, neck, or jaw; Mixture - typical and atypical location. ‡Radiation type: Typical - left arm or shoulder, right arm or shoulder, neck, or jaw; Atypical: retrosternal, precordial, right thoracic, bilateral thoracic, epigastric, or back regions; Mixture: typical and atypical irradiation. §Median (interquartile range). ||Symptom clusters: cluster 1 (no symptom cluster) - low endorsement probabilities for all items; cluster 2 (dyspnoea and sweating cluster) - high probability for dyspnoea at rest and sweating; cluster 3 (multiple symptoms cluster) - high probabilities for all items (dyspnoea at rest, exertional dyspnoea, sweating, nausea, vomiting, dizziness, blurry vision, presyncope, syncope, palpitation, weakness, other symptoms, other digestive symptoms and discomfort). ¶p for age differences within each sex; #p for differences between sexes.

### Multivariate models

Despite the higher probability of women of both age groups to present without pain than men, no differences were observed in the adjusted pain frequency and location between men and women. Referred pain was more likely to be experienced by women (<65 years old: adjusted odds ratio [OR] 2.90, 95% confidence interval [95% CI] 1.47-5.72; ≥65 years old: 1.60 (0.99-2.60), p for interaction=0.528).

Moreover, women of both age groups had a higher probability of having pain radiating to typical and atypical locations and of feeling pain with an intensity higher than 8 (Table 3). The association between intensity of pain and female sex was stronger for younger patients (interaction p=0.028) (Table 3).

The presence of at least one symptom other than pain occurred almost two times more often in women than in men. With cluster 1 as the reference, cluster 2 and 3 were positively associated with female sex, with the latter being statistically significant. The multiple symptoms cluster was almost 4-fold more likely in women than in men (3.92, 2.21-6.98 in the whole sample, interaction p=0.501) (Table 3).

No difference in the type of patients' activities at the beginning of the episode by sex was observed (Table 3).



**Table 3. Differences between women and men in clinical presentation of acute coronary syndrome, by age group**  
(men are the reference class).

| Symptoms                                                | <65 years |           | ≥65 years |             | Interaction p-value | Adjusted for                                                                               |
|---------------------------------------------------------|-----------|-----------|-----------|-------------|---------------------|--------------------------------------------------------------------------------------------|
|                                                         | OR        | 95% CI    | OR        | 95% CI      |                     |                                                                                            |
| <b>Pain</b>                                             | 0.76      | 0.14-4.0  | 0.52      | 0.19-1.47   | 0.777               | Age, type of ACS, marital status, dyslipidaemia, CABG                                      |
| <b>Typical (chest) pain</b><br>(vs atypical or mixture) | 0.97      | 0.44-2.14 | 1.71      | 0.90-3.23   | 0.973               | Age, type of ACS, coronary anatomy, region, smoking, dyslipidaemia, previous heart failure |
| <b>Referred pain</b>                                    | 2.90      | 1.47-5.72 | 1.60      | 0.99-2.60   | 0.528               | Age, type of ACS, coronary anatomy, region, income, social class, previous renal failure.  |
| <b>Radiation type†</b>                                  |           |           |           |             |                     |                                                                                            |
| <b>Typical</b>                                          | 1         | Reference | 1         | Reference   |                     | Age, type of ACS, employment status, region                                                |
| <b>Atypical</b>                                         | 1.49      | 0.70-3.20 | 1.38      | 0.72-2.66   | 0.415               |                                                                                            |
| <b>Mixture</b>                                          | 1.77      | 0.73-4.29 | 2.75      | 1.36-5.57   | 0.606               |                                                                                            |
| <b>Pain intensity</b><br>(higher than 8/10)             | 3.81      | 2.04-7.13 | 2.03      | 1.22-3.37   | 0.028               | Age, type of ACS, coronary anatomy, education, professional group, previous AMI            |
| <b>Symptoms</b>                                         | 1.98      | 1.00-3.91 | 1.85      | 1.10-3.12   | 0.799               | Age, type of ACS, region, previous AMI, previous heart failure                             |
| <b>Symptom clusters‡</b>                                |           |           |           |             |                     |                                                                                            |
| <b>Cluster 1</b>                                        | 1         | Reference | 1         | Reference   |                     | Age, type of ACS, professional group, region, previous AMI                                 |
| <b>Cluster 2</b>                                        | 1.07      | 0.53-2.15 | 1.67      | 0.97-2.87   | 0.246               |                                                                                            |
| <b>Cluster 3</b>                                        | 3.14      | 1.15-8.62 | 4.23      | 2.03-8.81   | 0.501               |                                                                                            |
| <b>Activity group</b>                                   |           |           |           |             |                     |                                                                                            |
| <b>Sleeping</b>                                         | 1         | Reference | 1         | (Reference) |                     | Age, type of ACS, previous heart failure                                                   |
| <b>Rest</b>                                             | 0.68      | 0.33-1.38 | 1.38      | 0.74-2.57   | 0.284               |                                                                                            |
| <b>Exertion</b>                                         | 0.77      | 0.37-1.59 | 1.70      | 0.89-3.25   | 0.408               |                                                                                            |

ACS, acute coronary syndrome; AMI, acute myocardial infarction; CABG: coronary artery bypass surgery; CI, confidence interval; OR, odds ratio.

\*Pain location: Typical - retrosternal, precordial, right thoracic, or bilateral thoracic; Atypical - epigastric, back, left arm or shoulder, right arm or shoulder, neck, or jaw; Mixture - typical and atypical location.

†Radiation type: Typical - left arm or shoulder, right arm or shoulder, neck, or jaw; Atypical: retrosternal, precordial, right thoracic, bilateral thoracic, epigastric, or back regions; Mixture: typical and atypical irradiation.

‡Symptom clusters: cluster 1 (no symptom cluster) - low endorsement probabilities for all items; cluster 2 (dyspnoea and sweating cluster) - high probability for dyspnoea at rest and sweating; cluster 3 (multiple symptoms cluster) - high probabilities for all items (dyspnoea at rest, exertional dyspnoea, sweating, nausea, vomiting, dizziness, blurry vision, presyncope, syncope, palpitation, weakness, other symptoms, other digestive symptoms and discomfort).

### Clinical presentation and outcomes

Patients with a diagnosis of STEMI/NC ACS who presented with atypical or mixture pain took longer to seek medical care (135 vs 85 min.,  $p=0.012$ ) and had longer total ischemic times (414 vs 328 min.,  $p=0.080$ ) than patients with chest pain (Table 4). Among patients with NSTEMI/ACS, differences in time delays according to pain location were not significant. Patients with atypical or mixture pain presented more frequently with hemodynamic instability at admission (9.7% vs 4.6%,  $p=0.014$ ) and had also more often moderate to severe left ventricular systolic dysfunction (32.9 vs 24.9%,  $p=0.052$ ) than patients with chest pain. The 30-day mortality adjusted for GRACE 2.0 was not significantly different between patients with chest pain and those with atypical or mixture pain (Table 4).

Among patients with STEMI/NC ACS, the total ischemic time was longer compared with patients who presented with the other symptoms clusters (533 minutes vs 321 and 384,  $p=0.111$ ). Patients with the multiple symptom cluster presented more often with hemodynamic instability at admission (13.4% vs 6.4% and 4.2%,  $p=0.034$ ). The mean 30-day mortality rate adjusted for the GRACE 2.0 risk score was significantly higher for patients presenting with the multiple symptom cluster (4.9% vs 0.9% for the two other clusters,  $p<0.001$ ) (Table 4).

Patients with atypical or mixture chest pain and patients with the multiple symptom cluster had higher mean GRACE and median CRUSADE risk scores (Table 4).

**Table 4.** Patient and system delays, severity indicators, risk stratification and 30-day mortality according to clinical presentation\*

|                                                                               | Typical (chest) pain† | Atypical or mixture pain | p      | No symptom cluster ‡ | Dyspnoea and sweating cluster | Multiple symptoms cluster | p      |
|-------------------------------------------------------------------------------|-----------------------|--------------------------|--------|----------------------|-------------------------------|---------------------------|--------|
| <b>Patient and system delays, median (IQR)</b>                                |                       |                          |        |                      |                               |                           |        |
| <b>STEMI/NC ACS</b>                                                           |                       |                          |        |                      |                               |                           |        |
| Symptom onset – FMC (min)                                                     | 85 (45-210)           | 135 (65-325)             | 0.012  | 90 (46-240)          | 90 (50-185)                   | 83 (45-430)               | 0.872  |
| Symptom onset-arterial access (min)                                           | 328 (192-1075)        | 414 (246-1335)           | 0.080  | 321 (194-1011)       | 384 (201-1440)                | 533 (323-1428)            | 0.111  |
| <b>NSTEMACS</b>                                                               |                       |                          |        |                      |                               |                           |        |
| Symptom onset – FMC (min)                                                     | 130 (60-393)          | 139 (60-335)             | 0.633  | 135 (60-390)         | 150 (60-390)                  | 113 (45-393)              | 0.795  |
| Hospital admission- coronary angiography time (hours)                         | 30 (18-57)            | 29 (20-48)               | 0.884  | 30 (18-56)           | 35 (18-70)                    | 28 (20-72)                | 0.385  |
| <b>Admission variables</b>                                                    |                       |                          |        |                      |                               |                           |        |
| Heart rate, mean (SD), bpm                                                    | 77 (18)               | 80 (24)                  | 0.117  | 78 (19)              | 77 (19)                       | 78 (28)                   | 0.923  |
| Systolic blood pressure, mean (SD), mmHg                                      | 144 (49)              | 139 (30)                 | 0.212  | 145 (59)             | 141 (30)                      | 136 (33)                  | 0.364  |
| Hemodynamic instability at admission§                                         | 32 (4.6)              | 14 (9.7)                 | 0.014  | 41 (6.4)             | 7 (4.2)                       | 9 (13.4)                  | 0.034  |
| <b>Risk stratification</b>                                                    |                       |                          |        |                      |                               |                           |        |
| Calculated GRACE risk score, mean (SD)                                        | 134 (36)              | 147 (39)                 | <0.001 | 137 (37)             | 138 (35)                      | 149 (44)                  | 0.041  |
| Calculated CRUSADE risk score, median (IQR)                                   | 21 (11-34)            | 25 (14-41)               | 0.012  | 22 (12-36)           | 23 (10-36)                    | 30 (16-47)                | 0.019  |
| <b>Moderate or severe left ventricular systolic dysfunction</b>               | 169 (24.9)            | 46 (32.9)                | 0.052  | 164 (26.4)           | 55 (33.3)                     | 17 (25.4)                 | 0.187  |
| <b>30-day mortality rate adjusted for the GRACE 2.0 risk score, mean (SD)</b> | 2.0 (4.0)             | 1.3 (1.4)                | 0.521  | 0.9 (2.0)            | 0.9 (2.0)                     | 4.9 (5.5)                 | <0.001 |

IQR, interquartile range; NSTEMACS, non-ST elevation acute coronary syndrome; SD, standard deviation; STEMI/NC ACS, ST elevation myocardial infarction/Non-classifiable acute coronary syndrome.

\*Values are number and percentage unless otherwise indicated.

Total may not add to 100% due to missing data.

†Chest pain: retrosternal, precordial, right thoracic, or bilateral thoracic.

‡No symptom cluster: low endorsement probabilities for all items; Dyspnoea and sweating cluster: high probability for dyspnoea at rest and sweating; Multiple symptoms cluster: high probabilities for all items (dyspnoea at rest, exertional dyspnoea, sweating, nausea, vomiting, dizziness, blurry vision, presyncope, syncope, palpitation, weakness, other symptoms, other digestive symptoms and discomfort)

§Killip class III or IV; or shock at admission.

## DISCUSSION

In our study, after adjustment, no differences in the frequency and location of pain by sex were observed. Referred pain, pain radiating to typical and atypical locations, and pain of higher intensity were more likely to occur among women. Women were also more likely than men to present with symptoms other than pain. Three clusters of symptoms other than pain were identified. Women were more likely to present with the multiple symptoms cluster. Presenting with the multiple symptoms cluster was associated with a higher mean 30-day mortality rate adjusted for the GRACE 2.0 risk score.

Differences between women and men in perception of symptoms of ACS might be explained by anatomical, physiological, biological, and psychosocial differences that influence each other.<sup>9, 21</sup> We measured several variables of these different domains. Differences in symptom presentation by sex might be the result of differences in response to history-taking,<sup>10</sup> differences in neural receptors and pathways involved in pain, and subtle differences in the location and type of atherosclerotic lesions.<sup>22, 23</sup> Our findings of similar ACS symptoms between women and men are consistent with previous studies,<sup>7, 24</sup> as well as our finding that women are more likely to have atypical presentations.<sup>9</sup> We observed that women have a higher likelihood of atypical referred pain and of several concomitant symptoms other than pain, common to other cardiac and non-cardiac diagnoses.

In our study, chest pain was the most frequent symptom in both sexes, consistent with previous studies.<sup>25-27</sup> Among those with pain, typical chest pain was observed in 82% of patients, regardless of sex. The remaining patients had pain in less typical locations and were thus prone to misdiagnosis and undertreatment and, consequently, to worse outcomes.<sup>28</sup> Considering differences in characteristics of pain by sex, studies suggested that women, in particular older women, were less likely to have the chief complaint of chest pain associated with acute myocardial infarction; while after adjustment, among patients with 65 or less years old, female sex was no longer a significant predictor.<sup>29</sup> Studies reported that chest pain did not differ between women and men,<sup>9</sup> others that women have pain in the neck and back more often than men,<sup>30, 31</sup> without distinguishing between direct and referred pain. In our study, referred pain was observed in 61% of patients, was more frequent in women, and typical referred pain was only observed in 33%. Notably, a study on diagnostic acuity of ACS symptoms showed that shoulder and arm pain was predictive of the diagnosis of ACS for women only.<sup>24</sup> Another study on sex differences in ACS symptom presentation in patients with 55 years old or younger showed that being a woman was independently associated with ACS presentation without chest pain.<sup>27</sup> Differences in age distribution, in

1  
2  
3 clinical presentation measuring, in selection and definition of confounder variables limit conclusive  
4 comparisons of studies evaluating differences in frequency and location of pain between women and men.  
5  
6 According to previous studies, with regard to other symptoms, a higher proportion of women have less  
7  
8 typical symptoms than men.<sup>8, 31</sup> Women have also reported other symptoms, such as indigestion,  
9  
10 palpitations, nausea, numbness in the hands, and unusual fatigue, more frequently than men.<sup>9</sup> In our  
11  
12 cohort, three symptom clusters were identified. Women had the multiple symptoms cluster more  
13  
14 frequently than did men, characterized by high probabilities for all symptoms. According to Rosenfeld et  
15  
16 al. women are more likely to cluster in a similar class, called the heavy symptom burden class.<sup>32</sup> With  
17  
18 regard to ACS symptom clustering, there are contradictory findings on identified clusters, the proportion  
19  
20 of patients per cluster, and differences between clusters regarding demographic factors. In our study,  
21  
22 cluster 1 and 3 (low and high probabilities for all symptoms, respectively) are in line with observations of  
23  
24 other settings.<sup>18, 33</sup> A recent systematic review of symptom clusters in cardiovascular disease<sup>34</sup> identified  
25  
26 clusters with the most symptoms and clusters with the lowest number of symptoms. Our dyspnoea and  
27  
28 sweating cluster has two common symptoms with the Riegel et al.<sup>26</sup> stress symptoms cluster, which  
29  
30 includes shortness of breath, sweating, nausea, indigestion, dread, and anxiety.

31  
32 Methodological differences related to sampling and measuring might explain these different results.  
33  
34 Strengths of our study include consecutive sampling, a questionnaire with detailed clinical information  
35  
36 was systematically applied, and we adjusted for several confounding variables.

37  
38 The value of symptoms for diagnosis of ACS varies across studies.<sup>14, 35, 36</sup> Overall, the diagnostic  
39  
40 performance of chest pain characteristics for diagnosis is limited, with likelihood ratios close to 1.<sup>37</sup>  
41  
42 Sensitivity for individual symptoms of ACS, using the 13-Item Acute Coronary Syndrome Checklist,  
43  
44 ranges from 27% to 67% for women and 14% to 72% for men. Additionally, specificity ranges from 33%  
45  
46 to 78% for women and 34% to 78% for men, with different associations between some symptoms and  
47  
48 diagnosis of ACS by sex.<sup>24</sup> However, physicians still base the likelihood of ACS mainly on symptoms  
49  
50 and use the electrocardiogram to rule in the diagnosis.<sup>38</sup> Evaluation of these patients is mostly unchanged,  
51  
52 without implementation of evidence-based assessment tools in clinical practice to improve diagnostic  
53  
54 accuracy. Public health messages should take into account the complexity of presenting symptoms of  
55  
56 ACS, particularly the significant proportion of women and men with ACS without typical chest pain.  
57  
58 Additionally, there is a higher likelihood of atypical referred pain and multiple concomitant symptoms in  
59  
60

1  
2  
3 women. These factors should be accounted for to encourage timely and appropriate care of patients with  
4 ACS.

5  
6 Presenting without chest pain and with the multiple symptoms cluster was associated with several  
7 markers of higher ACS severity and longer time delays, particularly significant among patients with  
8 STEMI/NC ACS. In our study, presenting with the multiple symptoms cluster, but not with atypical or  
9 mixture location of pain, was associated with a higher mean 30-day mortality adjusted for GRACE risk  
10 score. These results are consistent with data from the GRACE registry, that showed that patients with  
11 symptoms other than pain experienced greater morbidity and higher in-hospital mortality across the  
12 spectrum of ACS.<sup>28</sup> Other registry showed that the higher in-hospital mortality observed among women  
13 and men without chest pain, decreased or even reversed with advanced age.<sup>39</sup> Mortality is adjusted for  
14 GRACE risk score, however we cannot conclude that the difference in outcome observed is explained by  
15 symptoms other than pain per se. Previous studies showed that the higher in-hospital mortality of ACS  
16 patients who presented without chest pain was mostly due to late hospital arrival, comorbidities and  
17 underuse of medications and invasive procedures.<sup>6, 39, 40</sup> These studies focused mainly on presence of  
18 chest pain to define atypical presentation and used medical record reviews to characterize clinical  
19 presentation. More studies are needed to further explore the association between symptoms other than  
20 pain and outcomes.  
21  
22  
23  
24  
25  
26  
27  
28  
29  
30  
31  
32  
33  
34  
35  
36  
37  
38

### 39 **Limitations**

40 Participants were interviewed as soon as possible after admission, but this does not obviate the  
41 retrospective nature of data collection and the possibility of recall bias. Furthermore preceding interviews  
42 by physicians may have influenced answers to the questionnaire, however different consequences in  
43 women and men are not expected. The results of this study are valid for stable patients, who were  
44 admitted to the hospital and were able to answer the questionnaire in the acute phase of ACS. This type of  
45 study misses patients who die before reaching the hospital, patients who do not seek medical care,  
46 patients who are mistakenly discharged or misdiagnosed and admitted to non-cardiology departments.  
47 This sample selection process may contribute to underestimate the true prevalence of ACS atypical  
48 presentation in women and men.<sup>27</sup> For patients who were eligible but not enrolled only information on  
49  
50  
51  
52  
53  
54  
55  
56  
57  
58  
59  
60

1  
2  
3 sex, age and type of ACS was available. Patients who died before the interview were older ( $81.5 \pm 11.8$  vs  
4  $64.6 \pm 13.1$  years,  $p < 0.001$ ), were more often women (66.7% vs 26.0%,  $p < 0.001$ ), and more frequently had  
5 a diagnosis of STEMI (81.3% vs 43.4%,  $p = 0.003$ ) than did participants. Patients who were discharged or  
6 transferred to another hospital before the interview had STEMI less often (25.0% vs 43.4%,  $p = 0.005$ ) and  
7 patients who were not enrolled because of clinical instability or inability to understand the questionnaire  
8 were older. Patients who refused to participate were older ( $72.7 \pm 11.0$  vs  $64.0 \pm 13.0$  years,  $p < 0.001$ ), were  
9 less often partnered (65.7% vs 76.8%,  $p = 0.036$ ), and had little formal education (43.1% vs 19.7%,  
10  $p < 0.001$ ) compared with participants. Except for deceased patients, no difference in sex proportion was  
11 observed between participants and non-participants. We cannot exclude that some of the sex differences  
12 were caused by selection bias because of a higher risk of non-inclusion of women due to death in the  
13 early hours of admission, or due to a possible higher probability of misdiagnosis in women, particularly  
14 those with unstable angina.<sup>41</sup> Considering that atypical presentation is associated with a worse prognosis  
15 and with a higher probability of misdiagnosis, the proportion of patients with ACS presenting without  
16 typical chest pain or that of women with an atypical presentation could be even higher.<sup>28</sup>  
17  
18  
19  
20  
21  
22  
23  
24  
25  
26  
27  
28  
29

## 30 CONCLUSION

31 This study shows no significant differences in the frequency and location of pain by sex, but  
32 approximately 20% of patients do not present with chest pain, regardless of sex. Women are more likely  
33 to report referred pain and multiple symptoms simultaneously. Presentation with the multiple symptoms  
34 cluster pain is associated with higher 30-day mortality adjusted for GRACE score. Health education  
35 messages should take into account the complexity of presentation of ACS and emphasize the possible  
36 non-chest location of pain in both sexes and the higher probability of concomitant symptoms other than  
37 pain in women. Further sex-stratified analysis of ACS presentation is required to determine the diagnostic  
38 accuracy of symptoms by sex.  
39  
40  
41  
42  
43  
44  
45  
46  
47  
48  
49  
50  
51  
52  
53  
54  
55  
56  
57  
58  
59  
60

1  
2  
3  
4  
5  
6  
7  
8  
9  
10  
11  
12  
13  
14  
15  
16  
17  
18  
19  
20  
21  
22  
23  
24  
25  
26  
27  
28  
29  
30  
31  
32  
33  
34  
35  
36  
37  
38  
39  
40  
41  
42  
43  
44  
45  
46  
47  
48  
49  
50  
51  
52  
53  
54  
55  
56  
57  
58  
59  
60

**Figure 1.** Flow chart of the study population

For peer review only



1  
2  
3 **Funding:** This study was funded by FEDER through the Operational Programme Competitiveness and  
4 Internationalization and national funding from the Foundation for Science and Technology – FCT  
5 (Portuguese Ministry of Science, Technology and Higher Education) (FCOMP-01-0124-FEDER-  
6 028709), under the project “Inequalities in coronary heart disease management and outcomes in Portugal”  
7 (Ref. FCT PTDC/DTP-EPI/0434/2012) and Unidade de Investigação em Epidemiologia - Instituto de  
8 Saúde Pública da Universidade do Porto (EPIUnit) (POCI-01-0145-FEDER-006862;  
9 Ref.UID/DTP/04750/2013).

10  
11  
12  
13  
14  
15  
16  
17 **Conflicts of interest:** All authors have completed the ICMJE uniform disclosure form at  
18 [www.icmje.org/coi\\_disclosure.pdf](http://www.icmje.org/coi_disclosure.pdf) and declare: all authors had financial support through grants from the  
19 Foundation for Science and Technology – FCT (Portuguese Ministry of Science, Technology and Higher  
20 Education) and from Unidade de Investigação em Epidemiologia - Instituto de Saúde Pública da  
21 Universidade do Porto. No financial relationships with any organisations that might have an interest in the  
22 submitted work in the previous three years; no other relationships or activities that could appear to have  
23 influenced the submitted work.

### 31 **Contributors**

32  
33 Carla Araújo and Ana Azevedo had the original idea to develop the EPIHeart cohort study and were  
34 responsible for acquiring the study grant. Carla Araújo raised the hypotheses, participated in data  
35 collection and field work, analysed and interpreted the data, and drafted the first version of the  
36 manuscript. Olga Laszczyńska analysed and interpreted the data, participated in drafting and revising the  
37 first draft of the manuscript. Marta Viana and Andreia Borges participated in data collection, field work  
38 and interpretation of the data. Filipa Melão and Ana Henriques interpreted data. Milton Severo analysed  
39 and interpreted the data. Maria Júlia Maciel and Ilídio Moreira were involved in the conception of the  
40 study and in field work. Ana Azevedo was the responsible for the conception and development of the  
41 study, analysed and interpreted the data, participated in drafting and revising the first draft of the  
42 manuscript. All authors were involved in writing the paper, in revising it critically and approved the final  
43 version of the submitted manuscript.

### 53 **Data sharing**

54  
55 Data are available by email the corresponding author at [carla-r-araujo@hotmail.com](mailto:carla-r-araujo@hotmail.com).

## References

1. Mendis S, Global Status Report on noncommunicable diseases 2014. Report, World Health Organization, 2014.
2. Nichols M, Townsend N, Scarborough P, *et al.* Cardiovascular disease in Europe 2014: epidemiological update. *Eur Heart J* 2014; 35: 2929.
3. Canto JG, Rogers WJ, Goldberg RJ, *et al.* Association of age and sex with myocardial infarction symptom presentation and in-hospital mortality. *JAMA* 2012; 307: 813-22.
4. Doggen CJ, Zwerink M, Droste HM, *et al.* Prehospital paths and hospital arrival time of patients with acute coronary syndrome or stroke, a prospective observational study. *BMC Emerg Med* 2016; 16: 3.
5. Annemans L, Danchin N, Van de Werf F, *et al.* Prehospital and in-hospital use of healthcare resources in patients surviving acute coronary syndromes: an analysis of the EPICOR registry. *Open Heart* 2016; 3: e000347.
6. Manfredi O, Ricci B, Cenko E, *et al.* Association between comorbidities and absence of chest pain in acute coronary syndrome with in-hospital outcome. *Int J Cardiol* 2016; 217 Suppl: S37-43.
7. DeVon HA and Zerwic JJ. Symptoms of acute coronary syndromes: are there gender differences? A review of the literature. *Heart Lung* 2002; 31: 235-45.
8. DeVon HA and Zerwic JJ. The symptoms of unstable angina: do women and men differ? *Nurs Res* 2003; 52: 108-18.
9. DeVon HA, Ryan CJ, Ochs AL, *et al.* Symptoms across the continuum of acute coronary syndromes: differences between women and men. *Am J Crit Care* 2008; 17: 14-24.
10. Safdar B, Nagurney JT, Anise A, *et al.* Gender-specific research for emergency diagnosis and management of ischemic heart disease: proceedings from the 2014 Academic Emergency Medicine Consensus Conference Cardiovascular Research Workgroup. *Acad Emerg Med* 2014; 21: 1350-60.
11. Thygesen K, Alpert JS, Jaffe AS, *et al.* Third universal definition of myocardial infarction. *Eur Heart J* 2012; 33: 2551-67.
12. Statistics. Statistics Portugal. "Portuguese Classification of Occupations 2010" [accessed on November 15, 2016]. Available at: [https://www.ine.pt/xportal/xmain?xpid=INE&xpgid=ine\\_publicacoes&PUBLICACOESpub\\_boui=107961853&PUBLICACOESmodo=2](https://www.ine.pt/xportal/xmain?xpid=INE&xpgid=ine_publicacoes&PUBLICACOESpub_boui=107961853&PUBLICACOESmodo=2). 2011.
13. Swap CJ and Nagurney JT. Value and limitations of chest pain history in the evaluation of patients with suspected acute coronary syndromes. *JAMA* 2005; 294: 2623-9.
14. Eslick GD. Usefulness of chest pain character and location as diagnostic indicators of an acute coronary syndrome. *Am J Cardiol* 2005; 95: 1228-31.
15. Canto AJ, Kiefe CI, Goldberg RJ, *et al.* Differences in symptom presentation and hospital mortality according to type of acute myocardial infarction. *Am Heart J* 2012; 163: 572-9.
16. Roffi M, Patrono C, Collet JP, *et al.* 2015 ESC Guidelines for the management of acute coronary syndromes in patients presenting without persistent ST-segment elevation: Task Force for the Management of Acute Coronary Syndromes in Patients Presenting without Persistent ST-Segment Elevation of the European Society of Cardiology (ESC). *Eur Heart J* 2016; 37: 267-315.
17. Amsterdam EA, Wenger NK, Brindis RG, *et al.* 2014 AHA/ACC guideline for the management of patients with non-ST-elevation acute coronary syndromes: a report of the American College of Cardiology/American Heart Association Task Force on Practice Guidelines. *Circulation* 2014; 130: e344-426.
18. Ryan CJ, DeVon HA, Horne R, *et al.* Symptom clusters in acute myocardial infarction: a secondary data analysis. *Nurs Res* 2007; 56: 72-81.
19. Miaskowski C, Dodd M and Lee K. Symptom clusters: the new frontier in symptom management research. *J Natl Cancer Inst Monogr* 2004: 17-21.
20. Schiele F, Gale CP, Bonnefoy E, *et al.* Quality indicators for acute myocardial infarction: A position paper of the Acute Cardiovascular Care Association. *Eur Heart J Acute Cardiovasc Care* 2017; 6: 34-59.
21. Legato MJ. Gender and the heart: sex-specific differences in normal anatomy and physiology. *J Genet Specif Med* 2000; 3: 15-8.
22. Foreman RD. Mechanisms of cardiac pain. *Annu Rev Physiol* 1999; 61: 143-67.
23. Arslanian-Engoren C and Engoren M. Physiological and anatomical bases for sex differences in pain and nausea as presenting symptoms of acute coronary syndromes. *Heart Lung* 2010; 39: 386-93.
24. Devon HA, Rosenfeld A, Steffen AD, *et al.* Sensitivity, specificity, and sex differences in symptoms reported on the 13-item acute coronary syndrome checklist. *J Am Heart Assoc* 2014; 3: e000586.
25. Arslanian-Engoren C, Patel A, Fang J, *et al.* Symptoms of men and women presenting with acute coronary syndromes. *Am J Cardiol* 2006; 98: 1177-81.

- 1
- 2
- 3 26. Riegel B, Hanlon AL, McKinley S, *et al.* Differences in mortality in acute coronary syndrome
- 4 symptom clusters. *Am Heart J* 2010; 159: 392-8.
- 5 27. Khan NA, Daskalopoulou SS, Karp I, *et al.* Sex differences in acute coronary syndrome symptom
- 6 presentation in young patients. *JAMA Intern Med* 2013; 173: 1863-71.
- 7 28. Brieger D, Eagle KA, Goodman SG, *et al.* Acute coronary syndromes without chest pain, an
- 8 underdiagnosed and undertreated high-risk group: insights from the Global Registry of Acute Coronary
- 9 Events. *Chest* 2004; 126: 461-9.
- 10 29. Milner KA, Vaccarino V, Arnold AL, *et al.* Gender and age differences in chief complaints of acute
- 11 myocardial infarction (Worcester Heart Attack Study). *Am J Cardiol* 2004; 93: 606-8.
- 12 30. Everts B, Karlson BW, Wahrborg P, *et al.* Localization of pain in suspected acute myocardial
- 13 infarction in relation to final diagnosis, age and sex, and site and type of infarction. *Heart Lung* 1996; 25:
- 14 430-7.
- 15 31. Goldberg R, Goff D, Cooper L, *et al.* Age and sex differences in presentation of symptoms among
- 16 patients with acute coronary disease: the REACT Trial. Rapid Early Action for Coronary Treatment.
- 17 *Coron Artery Dis* 2000; 11: 399-407.
- 18 32. Rosenfeld AG, Knight EP, Steffen A, *et al.* Symptom clusters in patients presenting to the emergency
- 19 department with possible acute coronary syndrome differ by sex, age, and discharge diagnosis. *Heart*
- 20 *Lung* 2015; 44: 368-75.
- 21 33. Lindgren TG, Fukuoka Y, Rankin SH, *et al.* Cluster analysis of elderly cardiac patients' prehospital
- 22 symptomatology. *Nurs Res* 2008; 57: 14-23.
- 23 34. DeVon HA, Vuckovic K, Ryan CJ, *et al.* Systematic review of symptom clusters in cardiovascular
- 24 disease. *Eur J Cardiovasc Nurs* 2017; 16: 6-17.
- 25 35. Swap CJ and Nagurney JT. Value and limitations of chest pain history in the evaluation of patients
- 26 with suspected acute coronary syndromes. *JAMA* 2005; 294: 2623-9.
- 27 36. Bruyninckx R, Aertgeerts B, Bruyninckx P, *et al.* Signs and symptoms in diagnosing acute
- 28 myocardial infarction and acute coronary syndrome: a diagnostic meta-analysis. *Br J Gen Pract* 2008; 58:
- 29 105-11.
- 30 37. Rubini Gimenez M, Reiter M, Twerenbold R, *et al.* SEx-specific chest pain characteristics in the early
- 31 diagnosis of acute myocardial infarction. *JAMA Intern Med* 2014; 174: 241-9.
- 32 38. Kamali A, Soderholm M and Ekelund U. What decides the suspicion of acute coronary syndrome in
- 33 acute chest pain patients? *BMC Emerg Med* 2014; 14: 9.
- 34 39. Canto JG, Rogers WJ, Goldberg RJ, *et al.* Association of Age and Sex With Myocardial Infarction
- 35 Symptom Presentation and In-Hospital Mortality. *JAMA* 2012; 307: 813-22.
- 36 40. Canto JG, Shlipak MG, Rogers WJ, *et al.* Prevalence, clinical characteristics, and mortality among
- 37 patients with myocardial infarction presenting without chest pain. *JAMA* 2000; 283: 3223-9.
- 38 41. Pope JH, Aufderheide TP, Ruthazer R, *et al.* Missed diagnoses of acute cardiac ischemia in the
- 39 emergency department. *N Engl J Med* 2000; 342: 1163-70.
- 40
- 41
- 42
- 43
- 44
- 45
- 46
- 47
- 48
- 49
- 50
- 51
- 52
- 53
- 54
- 55
- 56
- 57
- 58
- 59
- 60

1  
2  
3  
4  
5  
6  
7  
8  
9  
10  
11  
12  
13  
14  
15  
16  
17  
18  
19  
20  
21  
22  
23  
24  
25  
26  
27  
28  
29  
30  
31  
32  
33  
34  
35  
36  
37  
38  
39  
40  
41  
42  
43  
44  
45  
46  
47  
48  
49  
50  
51  
52  
53  
54  
55  
56  
57  
58  
59  
60

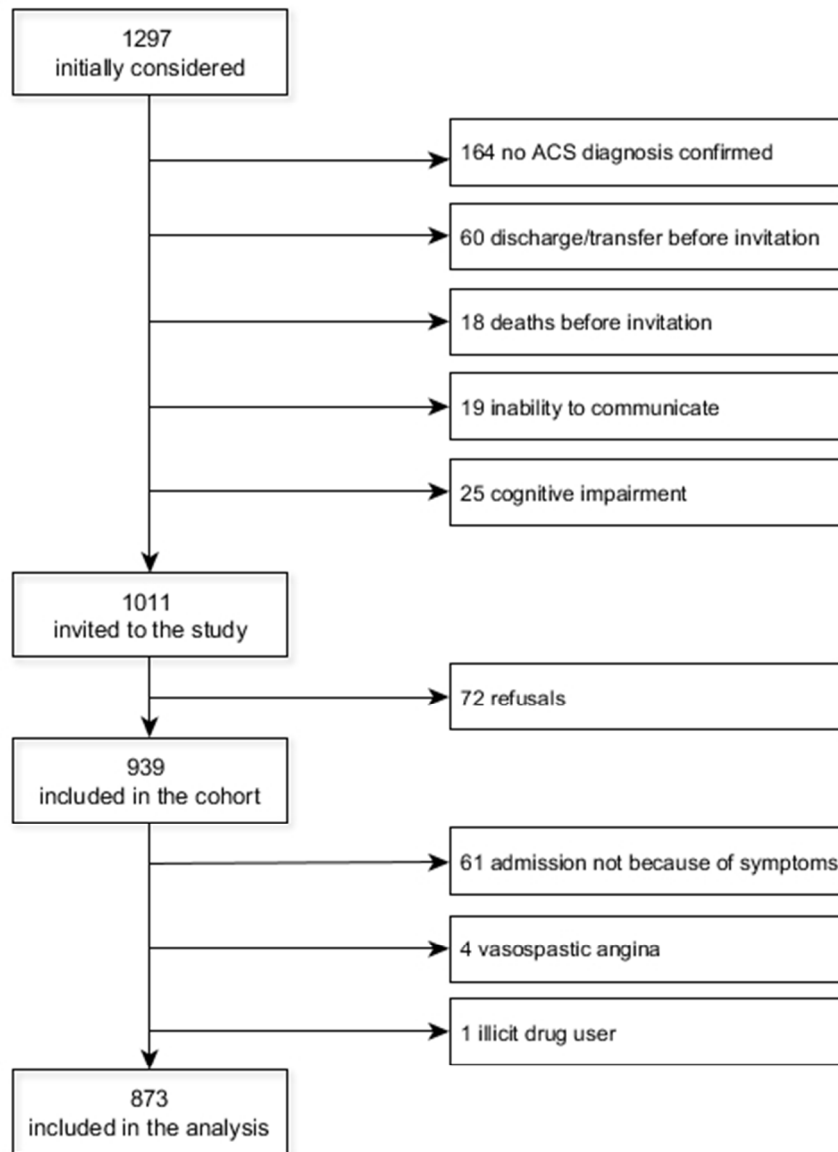

Figure 1. Flow chart of the study population

41x56mm (300 x 300 DPI)

Supplementary Table 1. Clinical presentation of patients with ST elevation myocardial infarction/non-classifiable acute coronary syndrome, by sex and age\*

|                                      | Women      |           |           |           |             | P <sup>¶</sup> | Men        |            |           |             |            | P <sup>¶</sup> | P <sup>#</sup> |
|--------------------------------------|------------|-----------|-----------|-----------|-------------|----------------|------------|------------|-----------|-------------|------------|----------------|----------------|
|                                      | <=45       | 46-64     | 65-79     | >=80      | Total       |                | <=45       | 46-64      | 65-79     | >=80        | Total      |                |                |
| <b>Total</b>                         | 6 (5.9)    | 22 (21.8) | 53 (52.5) | 20 (19.8) | 101 (100.0) |                | 37 (13.3)  | 144 (51.8) | 77 (27.7) | 20 (7.2)    | 278 (100)  |                |                |
| <b>Pain</b>                          | 6 (100.0)  | 21 (95.5) | 52 (98.1) | 16 (80.0) | 95 (94.1)   | 0.039          | 36 (97.3)  | 142 (98.6) | 73 (94.8) | 20 (100.0)  | 271 (97.5) | 0.338          | 0.106          |
| <b>Pain location<sup>†</sup></b>     |            |           |           |           |             |                |            |            |           |             |            |                |                |
| <b>Typical</b>                       | 5 (83.3)   | 17 (81.0) | 44 (84.6) | 9 (56.3)  | 75 (78.9)   |                | 31 (88.6)  | 120 (85.1) | 55 (76.4) | 13 (65.0)   | 219 (81.7) |                |                |
| <b>Atypical</b>                      | 1 (16.7)   | 4 (19.0)  | 2 (3.8)   | 5 (31.3)  | 12 (12.6)   |                | 1 (2.9)    | 17 (12.1)  | 14 (19.4) | 5 (25.0)    | 37 (13.8)  |                |                |
| <b>Mixture</b>                       | 0 (0.0)    | 0 (0.0)   | 6 (11.5)  | 2 (12.5)  | 8 (8.4)     | 0.021          | 3 (8.6)    | 4 (2.8)    | 3 (4.2)   | 2 (10.2)    | 12 (4.5)   | 0.032          | 0.347          |
| <b>Referred pain</b>                 | 4 (66.7)   | 18 (85.7) | 38 (73.1) | 8 (50.0)  | 68 (71.6)   | 0.114          | 24 (66.7)  | 90 (63.4)  | 51 (69.9) | 7 (35.0)    | 172 (63.5) | 0.038          | 0.152          |
| <b>Radiation type<sup>‡</sup></b>    |            |           |           |           |             |                |            |            |           |             |            |                |                |
| <b>Typical</b>                       | 3 (75.0)   | 8 (44.4)  | 17 (44.7) | 1 (12.5)  | 29 (42.6)   |                | 19 (79.2)  | 53 (59.6)  | 26 (51.0) | 3 (42.9)    | 101 (59.1) |                |                |
| <b>Atypical</b>                      | 0 (0.0)    | 5 (27.8)  | 10 (26.3) | 4 (50.0)  | 19 (27.9)   |                | 5 (20.8)   | 21 (23.6)  | 9 (17.6)  | 3 (42.9)    | 38 (22.2)  |                |                |
| <b>Mixture</b>                       | 1 (25.0)   | 5 (27.8)  | 11 (28.9) | 3 (37.5)  | 20 (29.4)   | 0.504          | 0 (0.0)    | 15 (16.9)  | 16 (31.4) | 1 (14.3)    | 32 (18.7)  | 0.018          | 0.060          |
| <b>Pain intensity<sup>§</sup></b>    | 9.5 (8-10) | 9 (8-10)  | 9 (8-10)  | 8.5 (8-9) | 9 (8-10)    | 0.784          | 9 (7.5-10) | 8 (7-10)   | 8 (6.5-9) | 7.5 (6.5-9) | 8 (7-10)   | 0.064          | <0.001         |
| <b>Symptom</b>                       | 5 (83.3)   | 20 (90.9) | 47 (88.7) | 17 (85.0) | 89 (88.1)   | 0.794          | 23 (62.2)  | 105 (72.9) | 61 (79.2) | 14 (70.0)   | 203 (73.0) | 0.283          | 0.002          |
| <b>Symptom clusters<sup>  </sup></b> |            |           |           |           |             |                |            |            |           |             |            |                |                |
| <b>Cluster 1</b>                     | 2 (33.3)   | 18 (81.8) | 27 (50.9) | 11 (55.0) | 58 (57.4)   |                | 26 (70.3)  | 102 (70.8) | 54 (70.1) | 16 (80.0)   | 198 (71.2) |                |                |
| <b>Cluster 2</b>                     | 3 (50.0)   | 2 (9.1)   | 16 (30.2) | 4 (20.0)  | 25 (24.8)   |                | 9 (24.3)   | 36 (25.0)  | 19 (24.7) | 3 (15.0)    | 67 (24.1)  |                |                |
| <b>Cluster 3</b>                     | 1 (16.7)   | 2 (9.1)   | 10 (18.9) | 5 (25.0)  | 18 (17.8)   | 0.132          | 2 (5.4)    | 6 (4.2)    | 4 (5.2)   | 1 (5.0)     | 13 (4.7)   | 0.967          | <0.001         |
| <b>Activity</b>                      |            |           |           |           |             |                |            |            |           |             |            |                |                |
| <b>Sleep</b>                         | 1 (16.7)   | 3 (14.3)  | 4 (7.8)   | 3 (15.8)  | 11 (11.3)   |                | 5 (13.5)   | 29 (20.1)  | 10 (13.0) | 4 (20.0)    | 48 (17.3)  |                |                |
| <b>Rest</b>                          | 3 (50.0)   | 9 (42.9)  | 22 (43.1) | 14 (73.7) | 48 (49.5)   |                | 19 (51.4)  | 65 (45.1)  | 43 (55.8) | 13 (65.0)   | 140 (50.4) |                |                |
| <b>Exertion</b>                      | 2 (33.3)   | 9 (42.9)  | 25 (49.0) | 2 (10.5)  | 38 (39.2)   | 0.069          | 13 (35.1)  | 50 (34.7)  | 24 (31.2) | 3 (15.0)    | 90 (32.4)  | 0.393          | 0.274          |
| <b>Stress trigger</b>                | 1 (16.7)   | 2 (9.1)   | 4 (7.5)   | 3 (15.8)  | 10 (10.0)   | 0.519          | 5 (13.5)   | 11 (7.7)   | 6 (7.9)   | 2 (10.0)    | 24 (8.7)   | 0.669          | 0.697          |

\*Values are number and percentage unless otherwise indicated. †Pain location: Typical - retrosternal, precordial, right thoracic, or bilateral thoracic; Atypical - epigastric, back, left arm or shoulder, right arm or shoulder, neck, or jaw; Mixture - typical and atypical location. ‡Radiation type: Typical - left arm or shoulder, right arm or shoulder, neck, or jaw; Atypical: retrosternal, precordial, right thoracic, bilateral thoracic, epigastric, or back regions; Mixture: typical and atypical irradiation. §Median (interquartile range). ||Symptom clusters: cluster 1 (no symptom cluster) - low endorsement probabilities for all items; cluster 2 (dyspnoea and sweating cluster) - high probability for dyspnoea at rest and sweating; cluster 3 (multiple symptoms cluster) - high probabilities for all items (dyspnoea at rest, exertional dyspnoea, sweating, nausea, vomiting, dizziness, blurry vision, presyncope, syncope, palpitation, weakness, other symptoms, other digestive symptoms and discomfort). ¶p for age differences within each sex; #p for differences between sexes.

Supplementary Table 2. Clinical presentation of patients with non-ST elevation acute coronary syndrome, by sex and age\*

|                           | Women        |            |           |           |            | P <sup>¶</sup> | Men        |            |            |           |            | P <sup>¶</sup> | P <sup>#</sup> |
|---------------------------|--------------|------------|-----------|-----------|------------|----------------|------------|------------|------------|-----------|------------|----------------|----------------|
|                           | <=45         | 46-64      | 65-79     | >=80      | Total      |                | <=45       | 46-64      | 65-79      | >=80      | Total      |                |                |
| <b>Total</b>              | 8 (6.3)      | 32 (25.4)  | 56 (44.4) | 30 (23.8) | 126 (100)  |                | 24 (6.5)   | 159 (43.2) | 143 (38.9) | 42 (11.4) | 368 (100)  |                |                |
| <b>Pain</b>               | 8 (100.0)    | 31 (96.9)  | 52 (92.9) | 28 (93.3) | 119 (94.4) | 0.864          | 24 (100.0) | 155 (97.5) | 141 (98.6) | 38 (90.5) | 358 (97.3) | 0.073          | 0.131          |
| <b>Pain location†</b>     |              |            |           |           |            |                |            |            |            |           |            |                |                |
| <b>Typical</b>            | 7 (87.5)     | 26 (83.9)  | 44 (86.3) | 23 (82.1) | 100 (84.7) |                | 22 (91.7)  | 126 (82.4) | 120 (85.1) | 31 (81.6) | 299 (84.0) |                |                |
| <b>Atypical</b>           | 0 (0.0)      | 5 (16.1)   | 3 (5.9)   | 1 (3.6)   | 9 (7.6)    |                | 2 (8.3)    | 16 (10.5)  | 16 (11.3)  | 5 (13.2)  | 39 (11.0)  |                |                |
| <b>Mixture</b>            | 1 (12.5)     | 0 (0.0)    | 4 (7.8)   | 4 (14.3)  | 9 (7.6)    | 0.172          | 0 (0.0)    | 11 (7.2)   | 5 (3.5)    | 2 (5.3)   | 18 (5.1)   | 0.778          | 0.367          |
| <b>Referred pain</b>      | 5 (62.5)     | 23 (74.2)  | 34 (65.4) | 17 (60.7) | 79 (66.4)  | 0.728          | 14 (58.3)  | 89 (57.4)  | 75 (53.2)  | 16 (42.1) | 194 (54.2) | 0.350          | 0.020          |
| <b>Radiation type‡</b>    |              |            |           |           |            |                |            |            |            |           |            |                |                |
| <b>Typical</b>            | 5 (100.0)    | 12 (52.2)  | 11 (32.4) | 6 (35.3)  | 34 (43.0)  |                | 9 (64.3)   | 61 (69.3)  | 41 (54.7)  | 7 (43.8)  | 118 (61.1) |                |                |
| <b>Atypical</b>           | 0 (0.0)      | 8 (34.8)   | 8 (23.5)  | 9 (52.9)  | 25 (31.6)  |                | 2 (14.3)   | 16 (18.2)  | 30 (40.0)  | 5 (31.3)  | 53 (27.5)  |                |                |
| <b>Mixture</b>            | 0 (0.0)      | 3 (13.0)   | 15 (44.1) | 2 (11.8)  | 20 (25.3)  | 0.008          | 3 (21.4)   | 11 (12.5)  | 4 (5.3)    | 4 (25.0)  | 22 (11.4)  | 0.007          | 0.005          |
| <b>Pain intensity§</b>    | 9.5 (8.5-10) | 9.5 (8-10) | 8 (8-10)  | 8 (7-9)   | 9 (8-10)   | 0.224          | 8 (6-9)    | 8 (6-9)    | 8 (6-9)    | 8 (7.5-9) | 8 (6-9)    | 0.200          | <0.001         |
| <b>Symptom</b>            | 6 (75.0)     | 25 (78.1)  | 44 (78.6) | 24 (80.0) | 99 (78.6)  | 0.992          | 20 (83.3)  | 104 (65.4) | 90 (62.9)  | 28 (66.7) | 242 (65.8) | 0.278          | 0.007          |
| <b>Symptom clusters  </b> |              |            |           |           |            |                |            |            |            |           |            |                |                |
| <b>Cluster 1</b>          | 5 (62.5)     | 23 (71.9)  | 35 (62.5) | 21 (70.0) | 84 (66.7)  |                | 17 (70.8)  | 130 (81.8) | 116 (81.1) | 36 (85.7) | 299 (81.3) |                |                |
| <b>Cluster 2</b>          | 2 (25.0)     | 6 (18.8)   | 12 (21.4) | 4 (13.3)  | 24 (19.1)  |                | 6 (25.0)   | 23 (14.5)  | 16 (11.2)  | 6 (14.3)  | 51 (13.9)  |                |                |
| <b>Cluster 3</b>          | 1 (12.5)     | 3 (9.4)    | 9 (16.1)  | 5 (16.7)  | 18 (14.3)  | 0.919          | 1 (4.2)    | 6 (3.8)    | 11 (7.7)   | 0 (0.0)   | 18 (4.9)   | 0.231          | <0.001         |
| <b>Activity</b>           |              |            |           |           |            |                |            |            |            |           |            |                |                |
| <b>Sleep</b>              | 1 (14.3)     | 13 (44.8)  | 7 (12.7)  | 4 (14.3)  | 25 (21.0)  |                | 1 (4.2)    | 36 (23.1)  | 25 (17.7)  | 9 (22.0)  | 71 (19.6)  |                |                |
| <b>Rest</b>               | 2 (28.6)     | 9 (31.0)   | 28 (50.9) | 15 (53.6) | 54 (45.4)  |                | 15 (62.5)  | 59 (37.8)  | 62 (44.0)  | 20 (48.8) | 156 (43.1) |                |                |
| <b>Exertion</b>           | 4 (57.1)     | 7 (24.1)   | 20 (36.4) | 9 (32.1)  | 40 (33.6)  | 0.032          | 8 (33.3)   | 61 (39.1)  | 54 (38.3)  | 12 (29.3) | 135 (37.3) | 0.180          | 0.768          |
| <b>Stress trigger</b>     | 1 (12.5)     | 4 (12.5)   | 7 (12.7)  | 0 (0.0)   | 12 (9.6)   | 0.140          | 6 (25.0)   | 12 (7.7)   | 9 (6.4)    | 4 (9.8)   | 31 (8.6)   | 0.044          | 0.731          |

\*Values are number and percentage unless otherwise indicated. †Pain location: Typical - retrosternal, precordial, right thoracic, or bilateral thoracic; Atypical - epigastric, back, left arm or shoulder, right arm or shoulder, neck, or jaw; Mixture - typical and atypical location. ‡Radiation type: Typical - left arm or shoulder, right arm or shoulder, neck, or jaw; Atypical: retrosternal, precordial, right thoracic, bilateral thoracic, epigastric, or back regions; Mixture: typical and atypical irradiation. §Median (interquartile range). ||Symptom clusters: cluster 1 (no symptom cluster) - low endorsement probabilities for all items; cluster 2 (dyspnoea and sweating cluster) - high probability for dyspnoea at rest and sweating; cluster 3 (multiple symptoms cluster) - high probabilities for all items (dyspnoea at rest, exertional dyspnoea, sweating, nausea, vomiting, dizziness, blurry vision, presyncope, syncope, palpitation, weakness, other symptoms, other digestive symptoms and discomfort). ¶p for age differences within each sex; #p for differences between sexes.

Supplementary Table 3. Marginal percentage of subjects with each symptom in each assigned cluster\*

|                                 | Symptom clusters                |                                 |                                |
|---------------------------------|---------------------------------|---------------------------------|--------------------------------|
|                                 | Cluster 1 <sup>*</sup><br>n=639 | Cluster 2 <sup>†</sup><br>n=167 | Cluster 3 <sup>‡</sup><br>n=67 |
| <b>Dyspnoea at rest</b>         | 17.4                            | 34.2                            | 37.3                           |
| <b>Exertional dyspnoea</b>      | 6.0                             | 2.1                             | 14.5                           |
| <b>Sweating</b>                 | 22.2                            | 89.6                            | 71.7                           |
| <b>Nausea and vomiting</b>      | 6.5                             | 9.7                             | 41.4                           |
| <b>Dizziness</b>                | 2.6                             | 18.0                            | 74.1                           |
| <b>Blurry vision</b>            | 0.6                             | 4.4                             | 27.5                           |
| <b>Presyncope</b>               | 1.3                             | 11.4                            | 42.7                           |
| <b>Syncope</b>                  | 1.6                             | 3.6                             | 10.5                           |
| <b>Palpitations</b>             | 0.3                             | 5.4                             | 19.5                           |
| <b>Weakness</b>                 | 7.5                             | 17.8                            | 64.4                           |
| <b>“Other symptoms”</b>         | 4.5                             | 5.5                             | 12.8                           |
| <b>Other digestive symptoms</b> | 1.0                             | 1.0                             | 1.4                            |
| <b>Discomfort</b>               | 1.3                             | 1.1                             | 4.2                            |

\*Values are percentages.

† Cluster 1: no symptom cluster; † Cluster 2: dyspnoea and sweating cluster; ‡ Cluster 3: multiple symptoms cluster.

STROBE Statement—checklist of items : *Sex differences in presenting symptoms of acute coronary syndrome: the EPIHeart cohort study*

|                              | Item No | Recommendation                                                                                                                                                                                                                                                                                                                                                                                                                                                                                                                                                                                                                                                                                                                                                                                                                                                   |
|------------------------------|---------|------------------------------------------------------------------------------------------------------------------------------------------------------------------------------------------------------------------------------------------------------------------------------------------------------------------------------------------------------------------------------------------------------------------------------------------------------------------------------------------------------------------------------------------------------------------------------------------------------------------------------------------------------------------------------------------------------------------------------------------------------------------------------------------------------------------------------------------------------------------|
| <b>Title and abstract</b>    | 1       | (a) Indicate the study's design with a commonly used term in the title or the abstract – <b>page 1 (title) and page 2 (abstract)</b><br>(b) Provide in the abstract an informative and balanced summary of what was done and what was found – <b>page 2</b>                                                                                                                                                                                                                                                                                                                                                                                                                                                                                                                                                                                                      |
| <b>Introduction</b>          |         |                                                                                                                                                                                                                                                                                                                                                                                                                                                                                                                                                                                                                                                                                                                                                                                                                                                                  |
| Background/rationale         | 2       | Explain the scientific background and rationale for the investigation being reported – <b>page 4</b>                                                                                                                                                                                                                                                                                                                                                                                                                                                                                                                                                                                                                                                                                                                                                             |
| Objectives                   | 3       | State specific objectives, including any prespecified hypotheses - <b>page 4</b>                                                                                                                                                                                                                                                                                                                                                                                                                                                                                                                                                                                                                                                                                                                                                                                 |
| <b>Methods</b>               |         |                                                                                                                                                                                                                                                                                                                                                                                                                                                                                                                                                                                                                                                                                                                                                                                                                                                                  |
| Study design                 | 4       | Present key elements of study design early in the paper – <b>pages 4 and 5</b>                                                                                                                                                                                                                                                                                                                                                                                                                                                                                                                                                                                                                                                                                                                                                                                   |
| Setting                      | 5       | Describe the setting, locations, and relevant dates, including periods of recruitment, exposure, follow-up, and data collection – <b>pages 4-6</b>                                                                                                                                                                                                                                                                                                                                                                                                                                                                                                                                                                                                                                                                                                               |
| Participants                 | 6       | <i>Cohort study</i> : Give the eligibility criteria, and the sources and methods of selection of participants – <b>pages 4 and 5</b>                                                                                                                                                                                                                                                                                                                                                                                                                                                                                                                                                                                                                                                                                                                             |
| Variables                    | 7       | Clearly define all outcomes, exposures, predictors, potential confounders, and effect modifiers. Give diagnostic criteria, if applicable – <b>pages 6 and 7</b>                                                                                                                                                                                                                                                                                                                                                                                                                                                                                                                                                                                                                                                                                                  |
| Data sources/<br>measurement | 8       | For each variable of interest, give sources of data and details of methods of assessment (measurement). Describe comparability of assessment methods if there is more than one group – <b>pages 5, 6 and 7</b>                                                                                                                                                                                                                                                                                                                                                                                                                                                                                                                                                                                                                                                   |
| Bias                         | 9       | Describe any efforts to address potential sources of bias - <b>page 7</b>                                                                                                                                                                                                                                                                                                                                                                                                                                                                                                                                                                                                                                                                                                                                                                                        |
| Study size                   | 10      | Explain how the study size was arrived at – <b>page 5 and figure 1</b>                                                                                                                                                                                                                                                                                                                                                                                                                                                                                                                                                                                                                                                                                                                                                                                           |
| Quantitative variables       | 11      | Explain how quantitative variables were handled in the analyses. If applicable, describe which groupings were chosen and why – <b>page 6 and 7</b>                                                                                                                                                                                                                                                                                                                                                                                                                                                                                                                                                                                                                                                                                                               |
| Statistical methods          | 12      | (a) Describe all statistical methods, including those used to control for confounding - <b>page 7</b><br>(b) Describe any methods used to examine subgroups and interactions – <b>page 7</b><br>(c) Explain how missing data were addressed – <b>Patients who were unable to answer the questionnaire (with missing data on clinical presentation) were not included.</b><br>(d) <i>Cohort study</i> —If applicable, explain how loss to follow-up was addressed – <b>Data were collected within a cohort study, but clinical presentation was collected through a questionnaire.</b><br>(e) Describe any sensitivity analyses – <b>We analysed clinical presentation separately by type of acute coronary syndrome (Supplementary tables 1 and 2), but as results were similar by sex and age both types of acute coronary syndrome were analysed together.</b> |

Continued on next page



|                          |    |                                                                                                                                                                                                                                                                                                                                                           |
|--------------------------|----|-----------------------------------------------------------------------------------------------------------------------------------------------------------------------------------------------------------------------------------------------------------------------------------------------------------------------------------------------------------|
| <b>Results</b>           |    |                                                                                                                                                                                                                                                                                                                                                           |
| Participants             | 13 | (a) Report numbers of individuals at each stage of study—eg numbers potentially eligible, examined for eligibility, confirmed eligible, included in the study, completing follow-up, and analysed – <b>pages 4 and 5</b><br>(b) Give reasons for non-participation at each stage – <b>page 5</b><br>(c) Consider use of a flow diagram – <b>Figure 1.</b> |
| Descriptive data         | 14 | (a) Give characteristics of study participants (eg demographic, clinical, social) and information on exposures and potential confounders – <b>pages 8-9</b><br>(b) Indicate number of participants with missing data for each variable of interest – <b>page 9</b>                                                                                        |
| Outcome data             | 15 | <i>Cohort study</i> —Report numbers of outcome events or summary measures over time – <b>pages 10-12</b>                                                                                                                                                                                                                                                  |
| Main results             | 16 | (a) Give unadjusted estimates and, if applicable, confounder-adjusted estimates and their precision (eg, 95% confidence interval). Make clear which confounders were adjusted for and why they were included – <b>pages 13-16</b><br>(b) Report category boundaries when continuous variables were categorized – <b>pages 10-14</b>                       |
| Other analyses           | 17 | Report other analyses done—<br>eg analyses of subgroups and interactions, and sensitivity analyses – <b>page 10</b>                                                                                                                                                                                                                                       |
| <b>Discussion</b>        |    |                                                                                                                                                                                                                                                                                                                                                           |
| Key results              | 18 | Summarise key results with reference to study objectives – <b>page 17</b>                                                                                                                                                                                                                                                                                 |
| Limitations              | 19 | Discuss limitations of the study, taking into account sources of potential bias or imprecision. Discuss both direction and magnitude of any potential bias – <b>pages 19 and 20</b>                                                                                                                                                                       |
| Interpretation           | 20 | Give a cautious overall interpretation of results considering objectives, limitations, multiplicity of analyses, results from similar studies, and other relevant evidence - <b>pages 17-19</b>                                                                                                                                                           |
| Generalisability         | 21 | Discuss the generalisability (external validity) of the study results – <b>page 19</b>                                                                                                                                                                                                                                                                    |
| <b>Other information</b> |    |                                                                                                                                                                                                                                                                                                                                                           |
| Funding                  | 22 | Give the source of funding and the role of the funders for the present study and, if applicable, for the original study on which the present article is based – <b>page 22</b>                                                                                                                                                                            |

# BMJ Open

## Sex differences in presenting symptoms of acute coronary syndrome: the EPIHeart cohort study

|                                 |                                                                                                                                                                                                                                                                                                                                                                                                                                                                                                                                                                                                                                                                                                                                                                                                                                                                                                                                                                                                                                                                                                       |
|---------------------------------|-------------------------------------------------------------------------------------------------------------------------------------------------------------------------------------------------------------------------------------------------------------------------------------------------------------------------------------------------------------------------------------------------------------------------------------------------------------------------------------------------------------------------------------------------------------------------------------------------------------------------------------------------------------------------------------------------------------------------------------------------------------------------------------------------------------------------------------------------------------------------------------------------------------------------------------------------------------------------------------------------------------------------------------------------------------------------------------------------------|
| Journal:                        | <i>BMJ Open</i>                                                                                                                                                                                                                                                                                                                                                                                                                                                                                                                                                                                                                                                                                                                                                                                                                                                                                                                                                                                                                                                                                       |
| Manuscript ID                   | bmjopen-2017-018798.R2                                                                                                                                                                                                                                                                                                                                                                                                                                                                                                                                                                                                                                                                                                                                                                                                                                                                                                                                                                                                                                                                                |
| Article Type:                   | Research                                                                                                                                                                                                                                                                                                                                                                                                                                                                                                                                                                                                                                                                                                                                                                                                                                                                                                                                                                                                                                                                                              |
| Date Submitted by the Author:   | 23-Nov-2017                                                                                                                                                                                                                                                                                                                                                                                                                                                                                                                                                                                                                                                                                                                                                                                                                                                                                                                                                                                                                                                                                           |
| Complete List of Authors:       | Araújo, Carla; Universidade do Porto, EPIUnit-Instituto de Saúde Pública; Centro Hospitalar de Trás-os-Montes e Alto Douro, EPE, Cardiologia<br>Laszczyńska, Olga; Universidade do Porto, EPIUnit-Instituto de Saúde Pública<br>Viana, Marta; Universidade do Porto, EPIUnit-Instituto de Saúde Pública<br>Melão, Filipa; Centro Hospitalar São João, EPE, Cardiologia<br>Henriques, Ana; Universidade do Porto, EPIUnit-Instituto de Saúde Pública<br>Borges, Andreia; Universidade do Porto, EPIUnit-Instituto de Saúde Pública<br>Severo, Milton; Universidade do Porto, EPIUnit-Instituto de Saúde Pública; Faculdade de Medicina da Universidade do Porto, Departamento de Ciências da Saúde Pública e Forenses e Educação Médica<br>Maciel, Maria Júlia; Centro Hospitalar São João, EPE, Cardiologia<br>Moreira, Ilídio; Centro Hospitalar de Trás-os-Montes e Alto Douro, EPE, Cardiologia<br>Azevedo, Ana; Universidade do Porto, EPIUnit-Instituto de Saúde Pública; Faculdade de Medicina da Universidade do Porto, Departamento de Ciências da Saúde Pública e Forenses e Educação Médica |
| <b>Primary Subject Heading</b>: | Cardiovascular medicine                                                                                                                                                                                                                                                                                                                                                                                                                                                                                                                                                                                                                                                                                                                                                                                                                                                                                                                                                                                                                                                                               |
| Secondary Subject Heading:      | Diagnostics                                                                                                                                                                                                                                                                                                                                                                                                                                                                                                                                                                                                                                                                                                                                                                                                                                                                                                                                                                                                                                                                                           |
| Keywords:                       | Sex, Acute coronary syndrome, Women, Diagnosis                                                                                                                                                                                                                                                                                                                                                                                                                                                                                                                                                                                                                                                                                                                                                                                                                                                                                                                                                                                                                                                        |
|                                 |                                                                                                                                                                                                                                                                                                                                                                                                                                                                                                                                                                                                                                                                                                                                                                                                                                                                                                                                                                                                                                                                                                       |

SCHOLARONE™  
Manuscripts

1  
2  
3 **Sex differences in presenting symptoms of acute coronary syndrome: the EPIHeart cohort study**  
4  
5

6 Carla Araújo,<sup>1,2</sup> Olga Laszczyńska,<sup>1</sup> Marta Viana,<sup>1</sup> Filipa Melão,<sup>3</sup> Ana Henriques,<sup>1</sup> Andreia Borges,<sup>1</sup>  
7  
8 Milton Severo,<sup>1,4</sup> Maria Júlia Maciel,<sup>3</sup> Ilídio Moreira,<sup>2</sup> Ana Azevedo<sup>1,4</sup>  
9

10  
11 <sup>1</sup>EPIUnit - Instituto de Saúde Pública, Universidade do Porto, Portugal;

12  
13 <sup>2</sup>Serviço de Cardiologia, Centro Hospitalar de Trás-os-Montes e Alto Douro, EPE, Hospital de São Pedro,  
14  
15 Vila Real, Portugal;

16  
17 <sup>3</sup>Serviço de Cardiologia, Centro Hospitalar São João, EPE, Porto, Portugal;

18  
19 <sup>4</sup>Departamento de Ciências da Saúde Pública e Forenses e Educação Médica, Faculdade de Medicina da  
20  
21 Universidade do Porto, Portugal.  
22

23  
24  
25 **Correspondence:**

26 Carla Araújo

27 Instituto de Saúde Pública da Universidade do Porto

28 Rua das Taipas nº135

29 4050-600 Porto

30 Telephone: +351 222061820 Fax: +351 222061821 Email: [carla-r-araujo@hotmail.com](mailto:carla-r-araujo@hotmail.com)  
31  
32  
33  
34  
35  
36  
37  
38  
39  
40  
41  
42  
43  
44  
45  
46  
47  
48  
49  
50  
51  
52  
53  
54  
55  
56  
57  
58  
59  
60

## ABSTRACT

**Objectives:** Prompt diagnosis of acute coronary syndrome (ACS) remains a challenge, with presenting symptoms affecting the diagnosis algorithm and, consequently, management and outcomes. This study aimed to identify sex differences in presenting symptoms of ACS.

**Design:** Data were collected within a prospective cohort study (EPIHeart).

**Setting:** Patients with confirmed diagnosis of type 1 (primary spontaneous) ACS who were consecutively admitted to the Cardiology Department of two tertiary hospitals in Portugal between August 2013 and December 2014.

**Participants:** Presenting symptoms of 873 patients (227 women) were obtained through a face-to-face interview.

**Outcome measures:** Typical pain was defined according to the definition of cardiology societies. Clusters of symptoms other than pain were identified by latent class analysis. Logistic regression was used to quantify differences in presentation of ACS symptoms by sex.

**Results:** Chest pain was reported by 82% of patients, with no differences in frequency or location between sexes. Women were more likely to feel pain with an intensity higher than 8/10 and this association was stronger for patients under 65 years old (interaction  $p=0.028$ ). Referred pain was also more likely in women, particularly pain referred to typical and atypical locations simultaneously. The multiple symptoms cluster, which was characterized by a high probability of presenting with all symptoms, was almost 4-fold more prevalent in women (3.92, 2.21–6.98). Presentation with this cluster was associated with a higher 30-day mortality rate adjusted for the GRACE 2.0 risk score (4.9% vs 0.9% for the two other clusters,  $p<0.001$ ).

**Conclusions:** While there are no significant differences in the frequency or location of pain between sexes, women are more likely to feel pain of higher intensity and to present with referred pain and symptoms other than pain. Knowledge of these ACS presentation profiles is important for health policy decisions and clinical practice.

Keywords: Sex; acute coronary syndrome; women; diagnosis.

**Strengths and limitations**

Within a prospective cohort study, presenting symptoms of acute coronary syndrome were obtained through a structured questionnaire applied within the first 48 hours after admission.

Consecutive sampling, the detailed clinical information obtained through the questionnaire and adjustment for several confounding variables strengthens our results.

The results of this study are valid for stable patients admitted to the hospital and who were able to answer the questionnaire in the acute phase of the acute coronary syndrome.

Some of the sex differences in presenting symptoms may be influenced by selection bias because of a higher risk of non-inclusion of women due to misdiagnosis or death in the early hours of admission.

## INTRODUCTION

Acute coronary syndrome (ACS) is still one of the main causes of death worldwide and in Europe.<sup>1, 2</sup> Coronary heart disease mortality has decreased in the last decades in developed countries because of primary prevention and improvement in treatment of patients with ACS.<sup>2</sup> Attainment of the maximal benefit of treatment of these patients is threatened by delayed diagnosis, partly dependent on clinical suspicion of ACS. The subjective experience of symptoms influences patients' attitudes in seeking help and professionals' interpretation of clinical presentations.<sup>3</sup> Early recognition of ACS may be challenging because while patients with presumed ACS have contact with healthcare providers,<sup>4</sup> many patients do not have an electrocardiogram before hospitalization.<sup>5</sup> Therefore, physicians frequently have to make decisions that are only clinically based.

The population of patients with atypical ACS presentation is still not well characterized.<sup>6</sup> Women and men generally have the same type of symptoms during an ACS episode, although the proportion presenting with different combinations of symptoms varies.<sup>7</sup> This conflicting evidence can be partly explained by the diverse methodology used, with few prospective studies, usually without a specific questionnaire. In prospective studies, small convenience samples were used and confounding was not always adequately addressed.<sup>8, 9</sup> Therefore, sex-specific research on ACS presentation is a challenge and priority.<sup>10</sup>

This study aimed to analyse sex differences in presenting symptoms of ACS within a prospective cohort study, taking into account the contribution of age, socioeconomic data, previous history of coronary heart disease, risk factors, comorbidities, type of ACS and coronary anatomy to the presenting symptoms.

## METHODS

### Study Design and Sample Selection

The EPIHeart cohort study was designed to identify inequalities in management and outcomes of patients with ACS. This study included all consecutive patients who were admitted between August 2013 and December 2014 to the Cardiology Department of two tertiary hospitals in two regions in northern Portugal (Hospital de São João, Porto, covering the metropolitan area of Porto in the coast; and Hospital de São Pedro, Vila Real, covering the interior, northeastern region). Eligible patients were 18 years old or older who lived in the catchment area of these hospitals (districts: Porto, Vila Real, Bragança, and Viseu),

1  
2  
3 with confirmed diagnosis of type 1 (primary spontaneous) ACS. The diagnosis of type 1 ACS and the  
4 classification in different subtypes was determined by the treating cardiologist, based on symptoms and  
5 signs at presentation, electrocardiogram findings and the increase in cardiac enzyme levels (high-  
6 sensitivity troponin I or T were used), according to the third universal definition of myocardial  
7 infarction.<sup>11</sup> The patients were also expected to be hospitalized for at least 48 hours and not  
8 institutionalized before the event. Of 1297 patients initially considered, in 164 the diagnosis of type 1  
9 ACS was not confirmed, 60 were excluded due to discharge or transfer before the interview, 18 died  
10 before being invited, and 44 were unable to answer the questionnaire because of clinical instability, no  
11 understanding of Portuguese, hearing problems, or cognitive impairment. Seventy-two patients refused to  
12 participate. For this analysis, we excluded 61 patients who were not admitted because of a symptom  
13 (patients referred by a doctor, after a scheduled appointment or diagnostic exam), four with vasospastic  
14 angina, and one illicit drug user. A total of 873 patients were included (Figure 1). The study protocol was  
15 in compliance with the principles of the Declaration of Helsinki and was approved by the Ethics  
16 Committee of both hospitals (*Comissão de Ética para a Saúde do Centro Hospitalar de S. João* and  
17 *Comissão de Ética do Centro Hospitalar de Trás-os-Montes e Alto Douro*, reference numbers of the  
18 approvals: 82/13 and 1286, respectively). All patients gave written informed consent.

### 33 **Procedures and data collection**

34 Presenting symptoms were obtained face-to-face using a structured questionnaire applied by trained  
35 interviewers, within the first 48 hours after admission, whenever possible. Over the following days, a  
36 second interview was conducted to collect data on sociodemographic characteristics and risk factors.  
37 Medical records were reviewed to extract data regarding previous medical history, admission information,  
38 and clinical data during hospitalization.

39 Pain, referred pain, and symptoms other than pain were measured dichotomously (yes/no). For the  
40 location of pain (direct and referred) patients were asked to point out where pain was occurring. To  
41 measure the intensity of pain, a 10-point scale (0, no pain; 10, pain of maximal intensity) was used.  
42 Symptoms other than pain included dyspnoea at rest, exertional dyspnoea, sweating, nausea, vomiting,  
43 dizziness, blurry vision, presyncope, syncope, palpitation, weakness, and an open-ended question of  
44 “other” (12 items). Answers to the last item enabled identification of two other relatively frequent  
45 symptoms, other digestive symptoms and discomfort. Activity at the onset of the episode was measured

1  
2  
3 dichotomously, including sleeping, rest, and any exertion. A stress trigger was assigned if the patient  
4 answered “yes” for at least one of following events within 24 hours preceding the episode: accident,  
5 recent diagnosis of disease, financial problems, and news of death/disease of a relative/friend.  
6

7  
8 Marital status was considered partnered for married patients or living in civil union. Education was  
9 recorded as completed years of schooling and classified into four categories: less than 4 (little formal  
10 education), 4 (elementary school), less than 12 (high school), and 12 or more years (secondary education  
11 or more). Occupations were classified into major professional groups, according to the Portuguese  
12 Classification of Occupations 2010,<sup>12</sup> integrated in the International Standard Classification of  
13 Occupations (ISCO/2008).  
14  
15  
16  
17  
18

### 19 20 21 **Definition of Variables**

22 Although symptoms of ACS have been widely described, their value for diagnosis of ACS is not  
23 unanimously recognized.<sup>13-15</sup> After discussion with clinical cardiologists of our team, we opted to use  
24 Cardiology Societies’ position papers to define direct and referred pain locations and to select symptoms  
25 to evaluate.<sup>16,17</sup> Direct pain location was classified as follows: 1) typical for retrosternal, precordial, right  
26 thoracic, or bilateral thoracic pain (chest pain); 2) atypical for epigastric pain or located in the back, left  
27 arm or shoulder, right arm or shoulder, neck, or jaw; and 3) a mixture when both typical and atypical  
28 locations were present. Referred pain location was considered as follows: 1) typical if pain referred to the  
29 left arm or shoulder, right arm or shoulder, neck, or jaw; 2) atypical if pain referred to retrosternal,  
30 precordial, right thoracic, bilateral thoracic, epigastric, or back regions; and 3) a mixture for referred pain  
31 in typical and atypical locations.  
32  
33  
34  
35  
36  
37  
38  
39

40 Patients rarely present with a single symptom during an episode of ACS, and present with multiple  
41 symptoms instead that do not occur in isolation and may cluster.<sup>18</sup> There has been increasing interest in  
42 symptom cluster analysis in cardiovascular disease because it aids in assessment by enhancing  
43 recognition of patients with similar symptom profiles.<sup>19</sup> Groups of symptoms other than pain were  
44 obtained by latent class analysis.  
45  
46  
47  
48

49 The small group of non-classified (NC) patients with ACS (patients with left bundle branch block) was  
50 grouped with patients with ST elevation myocardial infarction (STEMI) (STEMI/NC ACS group). Non-  
51 ST elevation ACS (NSTEMI) included unstable angina and non-ST elevation acute myocardial  
52 infarction or subacute myocardial infarction.  
53  
54  
55  
56  
57  
58  
59  
60



1  
2  
3 Considering the possible association between coronary anatomy and clinical presentation, we grouped  
4 patients according to coronary angiography into five groups: managed conservatively; non-obstructive  
5 coronary artery disease; lesions exclusively in the anterior descending artery; lesions in the right and/or  
6 circumflex artery; and lesions in the left main coronary artery, three-vessel disease or disease both in the  
7 anterior descending artery and the right or circumflex artery.  
8  
9  
10

### 11 12 13 **Data Analysis**

14  
15 Continuous variables are expressed as mean and standard deviation or as median and interquartile range  
16 (IQR). Categorical variables are shown as number and percentage. To compare differences between  
17 women and men, and by age-groups, the chi-square or Fisher's test was used for categorical variables and  
18 the t-test, Mann-Whitney or Kruskal-Wallis tests for continuous variables. Latent class analysis was used  
19 to identify distinct groups of individuals from a sample (clusters) who were homogeneous within the  
20 group. This was based on the fact that performance of an individual in a set of items is explained by a  
21 categorical latent variable with K classes (clusters), commonly called latent classes. The number of latent  
22 clusters was defined according to the Akaike information criterion (AIC). Starting from one single cluster  
23 and increasing one cluster at each step, the best solution was identified when an increase in the number of  
24 clusters did not lead to a decrease in the AIC.  
25  
26  
27  
28  
29  
30  
31  
32

33 Patient and system delays, severity indicators, risk stratification using calculated GRACE and CRUSADE  
34 risk scores, left ventricular systolic dysfunction and 30-day mortality rate adjusted for the GRACE 2.0  
35 risk score,<sup>20</sup> were assessed according to presence of typical (chest) pain and cluster of symptoms other  
36 pain. The 30-day mortality adjusted for the GRACE 2.0 risk score was estimated based on predicted  
37 probabilities derived from logistic regression. Logistic regression was used to identify variables  
38 associated with clinical presentation. Variables with  $p < 0.15$  for a crude association with the endpoint  
39 were entered in the initial model and a backward strategy was used to exclude the least significant  
40 variables, based on Wald tests. We were then able to obtain the most parsimonious model with all the  
41 important determinants. Previous data support significant interaction between age and sex with clinical  
42 presentation, attenuated with advancing age, mainly in those 65 years old or older.<sup>3</sup> We assessed for effect  
43 measure modification by stratifying adjusted analyses based on two age groups (under 65 and 65 years old  
44 or older). Considering the relevance of analysing sex differences in ACS clinical presentation in younger  
45  
46  
47  
48  
49  
50  
51  
52  
53  
54  
55  
56  
57  
58  
59  
60

1  
2 patients, we also performed the age stratified multivariate models using 55 years old as cut-off. Sex, age  
3 (continuous), and type of ACS were forced to remain in the models.  
4

5  
6 All analyses were performed using STATA version 11.1 for Windows (Stata Corp LP, College Station,  
7 TX) and R version 2.12.1 (R Foundation for Statistical Computing, Vienna, Austria).  
8  
9

## 10 11 12 13 **RESULTS**

### 14 15 16 **Baseline characteristics**

17  
18 Women (n=227, 26.0%) were older (69.1 vs 62.2 years,  $p<0.001$ ) and more frequently lived in the interior  
19 region (52.4% vs 38.7%,  $p<0.001$ ) than men. Women were more often treated conservatively and had  
20 non-obstructive coronary artery disease more frequently than men. In this sample, no difference by sex  
21 was observed in the type of ACS, where 56.6% of the patients had a discharge diagnosis of NSTEMI  
22 (Table 1).  
23  
24  
25  
26

27 Women more frequently had hypertension (81.5% vs 62.7%,  $p<0.001$ ) and diabetes (38.8% vs 29.9%,  
28  $p=0.014$ ), and were more frequently obese (25.5% vs 18.5%,  $p=0.020$ ) and never smokers compared with  
29 men ( $p<0.001$ , Table 1). Men were submitted to percutaneous coronary intervention more often than  
30 women. There were no significant differences in a previous history of renal failure, prior myocardial  
31 infarction, prior coronary artery bypass surgery, prior heart failure, and dementia by sex (Table 1).  
32  
33  
34  
35

36 Women were more likely to be unpartnered, disabled, less educated, and had a lower income compared  
37 with men. The median time that elapsed between admission and application of the symptom questionnaire  
38 was slightly longer in women than in men (Table 1).  
39  
40  
41  
42  
43  
44  
45  
46  
47  
48  
49  
50  
51  
52  
53  
54  
55  
56  
57  
58  
59  
60

**Table 1. Baseline demographic, socioeconomic and clinical characteristics in the whole sample and by sex\***

|                                           | <b>Total<br/>(n = 873)</b> | <b>Women<br/>(n = 227)</b> | <b>Men<br/>(n = 646)</b> | <b>p</b> |
|-------------------------------------------|----------------------------|----------------------------|--------------------------|----------|
| <b>Age</b> (years), mean (SD)             | 64.0 (13.0)                | 69.1 (12.7)                | 62.2 (12.7)              | <0.001   |
| <b>Socioeconomic</b>                      |                            |                            |                          |          |
| Marital status                            |                            |                            |                          |          |
| Partnered                                 | 667 (76.8)                 | 133 (58.9)                 | 534 (83.2)               | <0.001   |
| Education                                 |                            |                            |                          |          |
| Little formal education                   | 172 (19.9)                 | 95 (42.4)                  | 77 (12.0)                |          |
| Elementary school                         | 337 (39.1)                 | 73 (32.6)                  | 264 (41.3)               |          |
| High school                               | 213 (24.7)                 | 32 (14.3)                  | 181 (28.3)               |          |
| Secondary education or more               | 141 (16.3)                 | 24 (10.7)                  | 117 (18.3)               | <0.001   |
| Employment status                         |                            |                            |                          |          |
| Employed/looking after home               | 282 (32.6)                 | 64 (28.3)                  | 218 (34.1)               |          |
| Unemployed                                | 107 (12.4)                 | 16 (7.1)                   | 91 (14.2)                |          |
| Retired                                   | 334 (38.6)                 | 93 (41.2)                  | 241 (37.7)               |          |
| Disabled                                  | 143 (16.5)                 | 53 (23.5)                  | 90 (14.1)                | <0.001   |
| Subjective social class                   |                            |                            |                          |          |
| Low                                       | 281 (32.2)                 | 81 (35.7)                  | 200 (31.0)               |          |
| Lower-middle                              | 281 (32.2)                 | 58 (25.6)                  | 223 (34.5)               |          |
| Higher-middle/High                        | 60 (6.9)                   | 16 (7.1)                   | 44 (6.8)                 |          |
| No response                               | 251 (28.8)                 | 72 (31.7)                  | 179 (27.7)               | 0.097    |
| Household income (euros)                  |                            |                            |                          |          |
| <500                                      | 204 (23.4)                 | 77 (33.9)                  | 127 (19.7)               |          |
| 501-1000                                  | 276 (31.6)                 | 60 (26.4)                  | 216 (33.4)               |          |
| 1001 – 2000                               | 146 (16.7)                 | 22 (9.7)                   | 124 (19.2)               |          |
| >2000                                     | 88 (10.1)                  | 14 (6.2)                   | 74 (11.5)                |          |
| No response                               | 159 (18.2)                 | 54 (23.8)                  | 105 (16.3)               | <0.001   |
| Region                                    |                            |                            |                          |          |
| Metropolitan area of Porto                | 504 (57.7)                 | 108 (47.6)                 | 396 (61.3)               |          |
| North-eastern region of Portugal          | 369 (42.3)                 | 119 (52.4)                 | 250 (38.7)               | <0.001   |
| <b>Cardiovascular risk factors</b>        |                            |                            |                          |          |
| Smoking habit                             |                            |                            |                          |          |
| Never                                     | 369 (42.3)                 | 184 (81.0)                 | 185 (28.6)               |          |
| Current                                   | 283 (32.4)                 | 34 (15.0)                  | 249 (38.5)               |          |
| Former                                    | 221 (25.3)                 | 9 (4.0)                    | 212 (32.8)               | <0.001   |
| Hypertension                              | 590 (67.6)                 | 185 (81.5)                 | 405 (62.7)               | <0.001   |
| Diabetes mellitus                         | 281 (32.2)                 | 88 (38.8)                  | 193 (29.9)               | 0.014    |
| Dyslipidaemia                             | 535 (61.4)                 | 144 (63.4)                 | 391 (60.6)               | 0.454    |
| BMI (kg/m <sup>2</sup> )                  |                            |                            |                          |          |
| Median (IQR)                              | 26.5 (18.0-44.6)           | 26.7 (19.5-37.9)           | 26.4 (18.2-39.2)         | 0.531    |
| Underweight                               | 11 (1.4)                   | 2 (0.9)                    | 9 (1.5)                  |          |
| Normal weight                             | 272 (33.4)                 | 80 (37.0)                  | 192 (32.1)               |          |
| Overweight                                | 366 (44.9)                 | 79 (36.6)                  | 287 (47.9)               |          |
| Obese                                     | 166 (20.4)                 | 55 (25.5)                  | 111 (18.5)               | 0.020    |
| Family history of CVD                     | 303 (34.7)                 | 73 (32.2)                  | 230 (35.6)               | 0.105    |
| <b>Previous medical history</b>           |                            |                            |                          |          |
| Renal failure                             | 64 (7.3)                   | 14 (6.1)                   | 50 (7.7)                 | 0.434    |
| Myocardial infarction                     | 156 (17.9)                 | 34 (15.0)                  | 122 (18.9)               | 0.186    |
| PCI                                       | 100 (12.4)                 | 18 (8.4)                   | 82 (13.8)                | 0.041    |
| CABG                                      | 34 (4.2)                   | 5 (2.3)                    | 29 (4.9)                 | 0.111    |
| Heart failure                             | 63 (7.5)                   | 21 (9.6)                   | 42 (6.8)                 | 0.172    |
| Dementia                                  | 7 (0.8)                    | 4 (1.8)                    | 3 (0.5)                  | 0.060    |
| <b>ACS type</b>                           |                            |                            |                          |          |
| STEMI/NC ACS                              | 379 (43.4)                 | 101 (44.5)                 | 278 (43.0)               |          |
| NSTEACS                                   | 494 (56.6)                 | 126 (55.5)                 | 368 (57.0)               | 0.703    |
| <b>Coronary anatomy</b>                   |                            |                            |                          |          |
| Non-obstructive disease                   | 57 (6.9)                   | 22 (10.6)                  | 35 (5.6)                 |          |
| Left anterior descending artery only      | 162 (19.5)                 | 38 (18.3)                  | 124 (19.9)               |          |
| Right and/or circumflex artery only       | 196 (23.6)                 | 46 (22.1)                  | 150 (24.0)               |          |
| Mixture                                   | 417 (50.1)                 | 102 (49.0)                 | 315 (50.5)               |          |
| Not submitted to coronary angiography     | 41 (4.7)                   | 19 (8.4)                   | 22 (3.4)                 | 0.004    |
| <b>Symptom questionnaire application</b>  |                            |                            |                          |          |
| Time from admission (hours), median (IQR) | 42.1 (25.0-68.0)           | 45.4 (28.5-72.3)           | 40.0 (24.0-67.4)         | 0.052    |

\*Values are number and percentage unless otherwise indicated.

ACS, acute coronary syndrome; BMI, body mass index; CABG, coronary artery bypass surgery; CVD, cardiovascular diseases; IQR, interquartile range; NSTEMI, non-ST elevation acute coronary syndrome; PCI, percutaneous coronary intervention; SD, standard deviation; STEMI/NC ACS, ST elevation myocardial infarction/non-classifiable acute coronary syndrome.

### Symptom characteristics by sex and age

Because differences in symptoms by sex and age were similar in direction and magnitude in STEMI/NC ACS and NSTEMI/ACS (Supplementary Tables 1 and 2), both types of ACS were analysed together.

Although pain was present in most patients, men presented with pain more frequently than did women (97.4% vs 94.3%,  $p=0.028$ ), with a higher sex difference among patients with 80 or more years old (88.0% vs 93.5%). Older patients presented less often pain, but the difference by age group in both sexes was not significant (Table 2). No difference was found in the location of pain by sex. Approximately 80% of patients felt chest pain (typical pain). Older women presented less frequently with chest pain and had chest pain and pain in other locations (mixture group) more often than did younger women ( $p=0.014$ ). Referred pain was observed more frequently in women and in younger patients (only significant for men,  $p=0.024$ ); again in the older age group, the difference between women and men was notorious (56.8% vs 39.7%, respectively). Atypical and mixture referred pain were more frequent in women than in men ( $p<0.001$ ), mainly in women aged  $\geq 65$  years ( $p=0.009$ ). Women felt pain with higher intensity than did men (median [IQR]: 9 [8–10] vs 8 [6–9],  $p<0.001$ ), without a difference by age (Table 2). Women presented with symptoms other than pain more frequently than did men (82.8% vs 68.9%,  $p<0.001$ ), with no difference by age group in both sexes (Table 2).

Considering symptoms other than pain, the AIC optimum value supported a preference for a three-cluster solution (AIC 7207.508, 6869.390, 6862.476, and 6870.372 for one, two, three, and four clusters, respectively). Cluster 1 had low endorsement probabilities for all items (no symptoms cluster). Cluster 2 had a high probability for dyspnoea at rest and sweating, and a low probability for the remaining items (dyspnoea and sweating cluster). Cluster 3 had high probabilities for all items (multiple symptoms cluster). This three-cluster model made sense conceptually to cardiologists of our team. Clusters counts and probabilities of occurrence of symptoms in established clusters are shown in Supplementary Table 3. Differences in proportions of women and men in the three clusters were observed ( $p<0.001$ , Table 2). Cluster 1 was the most prevalent, in which men presented with the no symptoms cluster more frequently (76.9% vs 62.6%) and the multiple symptoms cluster less frequently (4.8% vs 15.9%) than did women. Higher differences of multiple symptoms cluster proportions between women and men were observed among patients in the older age group. The proportion of dyspnoea and sweating cluster was similar in men and women (Table 2).

1  
2  
3 Approximately 45% of patients were at rest and 35% were under physical effort at the beginning of the  
4 episode. Older women were more frequently at rest at the beginning of the episode and younger women  
5 were more frequently under effort ( $p=0.011$ ). Less than 10% of patients identified a stressful event in the  
6 previous 24 hours, with no difference by sex, but among men, a younger age was slightly associated with  
7 this trigger ( $p=0.045$ , Table 2).  
8  
9  
10  
11  
12  
13  
14  
15  
16  
17  
18  
19  
20  
21  
22  
23  
24  
25  
26  
27  
28  
29  
30  
31  
32  
33  
34  
35  
36  
37  
38  
39  
40  
41  
42  
43  
44  
45  
46  
47  
48  
49  
50  
51  
52  
53  
54  
55  
56  
57  
58  
59  
60

For peer review only

Table 2. Clinical presentation of patients with acute coronary syndrome, by sex and age\*

|                                      | Women      |           |            |           |             | P <sup>†</sup> | Men       |            |            |           |            | P <sup>†</sup> | P <sup>#</sup> |
|--------------------------------------|------------|-----------|------------|-----------|-------------|----------------|-----------|------------|------------|-----------|------------|----------------|----------------|
|                                      | <=45       | 46-64     | 65-79      | >=80      | Total       |                | <=45      | 46-64      | 65-79      | >=80      | Total      |                |                |
| <b>Total</b>                         | 14 (6.2)   | 54 (23.8) | 109 (48.0) | 50 (22.0) | 227 (100.0) |                | 61 (9.4)  | 303 (46.9) | 220 (34.1) | 62 (9.6)  | 646 (100)  |                |                |
| <b>Pain</b>                          | 14 (100.0) | 52 (96.3) | 104 (95.4) | 44 (88.0) | 214 (94.3)  | 0.229          | 60 (98.4) | 297 (98.0) | 214 (97.3) | 58 (93.5) | 629 (97.4) | 0.228          | 0.028          |
| <b>Pain location<sup>†</sup></b>     |            |           |            |           |             |                |           |            |            |           |            |                |                |
| <b>Typical</b>                       | 12 (85.7)  | 43 (82.7) | 88 (85.4)  | 32 (72.7) | 175 (82.2)  |                | 53 (89.8) | 246 (83.7) | 175 (82.2) | 44 (75.9) | 518 (83.0) |                |                |
| <b>Atypical</b>                      | 1 (7.1)    | 9 (17.3)  | 5 (4.9)    | 6 (13.6)  | 17 (8.0)    | 0.014          | 3 (5.1)   | 33 (11.2)  | 30 (14.1)  | 10 (17.2) | 76 (12.2)  | 0.327          | 0.165          |
| <b>Mixture</b>                       | 1 (7.1)    | 0 (0.0)   | 10 (9.7)   | 6 (13.6)  | 17 (8.0)    |                | 3 (5.1)   | 15 (5.1)   | 8 (3.8)    | 4 (6.9)   | 30 (4.8)   |                |                |
| <b>Referred pain</b>                 | 9 (64.3)   | 41 (78.8) | 72 (69.2)  | 25 (56.8) | 147 (68.7)  | 0.129          | 38 (63.3) | 179 (60.3) | 126 (58.9) | 23 (39.7) | 366 (58.2) | 0.024          | 0.007          |
| <b>Radiation type<sup>‡</sup></b>    |            |           |            |           |             |                |           |            |            |           |            |                |                |
| <b>Typical</b>                       | 8 (88.9)   | 20 (48.8) | 28 (38.9)  | 7 (28.0)  | 63 (42.9)   | 0.009          | 28 (73.7) | 114 (64.4) | 67 (53.2)  | 10 (43.5) | 219 (60.2) | 0.104          | <0.001         |
| <b>Atypical</b>                      | 0 (0.0)    | 13 (31.7) | 18 (25.0)  | 13 (52.0) | 44 (29.9)   |                | 7 (18.4)  | 37 (20.9)  | 39 (31.0)  | 8 (34.8)  | 91 (25.0)  |                |                |
| <b>Mixture</b>                       | 1 (11.1)   | 8 (19.5)  | 26 (36.1)  | 5 (20.0)  | 40 (27.2)   |                | 3 (7.9)   | 26 (14.7)  | 20 (15.9)  | 5 (21.7)  | 54 (14.8)  |                |                |
| <b>Pain intensity<sup>§</sup></b>    | 9.5 (8-10) | 9 (8-10)  | 9 (8-9)    | 8 (8-9)   | 9 (8-10)    | 0.170          | 8 (7-10)  | 8 (6-9)    | 8 (6-9)    | 8 (7-9)   | 8 (6-9)    | 0.095          | <0.001         |
| <b>Symptom</b>                       | 11 (78.6)  | 45 (83.3) | 91 (83.5)  | 41 (82.0) | 188 (82.8)  | 0.947          | 43 (70.5) | 209 (69.0) | 151 (68.6) | 42 (67.7) | 445 (68.9) | 0.989          | <0.001         |
| <b>Symptom clusters<sup>  </sup></b> |            |           |            |           |             |                |           |            |            |           |            |                |                |
| <b>Cluster 1</b>                     | 7 (50.0)   | 41 (75.9) | 62 (56.9)  | 32 (64.0) | 142 (62.6)  | 0.183          | 43 (70.5) | 232 (76.6) | 170 (77.3) | 52 (83.9) | 497 (76.9) | 0.345          | <0.001         |
| <b>Cluster 2</b>                     | 5 (35.7)   | 8 (14.8)  | 28 (25.7)  | 8 (16.0)  | 49 (21.6)   |                | 15 (25.6) | 59 (19.5)  | 35 (15.9)  | 9 (14.5)  | 118 (18.3) |                |                |
| <b>Cluster 3</b>                     | 2 (14.3)   | 5 (9.3)   | 19 (17.4)  | 10 (20.0) | 36 (15.9)   |                | 3 (4.9)   | 12 (4.0)   | 15 (6.8)   | 1 (1.61)  | 31 (4.80)  |                |                |
| <b>Activity</b>                      |            |           |            |           |             |                |           |            |            |           |            |                |                |
| <b>Sleep</b>                         | 2 (15.4)   | 16 (32.0) | 11 (10.4)  | 7 (14.9)  | 36 (16.7)   | 0.011          | 6 (9.8)   | 65 (21.7)  | 35 (16.1)  | 13 (21.3) | 119 (18.6) | 0.087          | 0.816          |
| <b>Rest</b>                          | 5 (38.5)   | 18 (36.0) | 50 (47.2)  | 29 (61.7) | 102 (47.2)  |                | 34 (55.7) | 124 (41.3) | 105 (48.2) | 33 (54.1) | 296 (46.3) |                |                |
| <b>Exertion</b>                      | 6 (46.2)   | 16 (32.0) | 45 (42.5)  | 11 (23.4) | 78 (36.1)   |                | 21 (34.4) | 111 (37.0) | 78 (35.8)  | 15 (24.6) | 225 (35.2) |                |                |
| <b>Stress trigger</b>                | 2 (14.3)   | 6 (11.1)  | 11 (10.2)  | 3 (6.1)   | 22 (9.8)    | 0.700          | 11 (18.0) | 23 (7.7)   | 15 (6.9)   | 6 (9.8)   | 55 (8.6)   | 0.045          | 0.605          |

\*Values are number and percentage unless otherwise indicated. †Pain location: Typical - retrosternal, precordial, right thoracic, or bilateral thoracic; Atypical - epigastric, back, left arm or shoulder, right arm or shoulder, neck, or jaw; Mixture - typical and atypical location. ‡Radiation type: Typical - left arm or shoulder, right arm or shoulder, neck, or jaw; Atypical: retrosternal, precordial, right thoracic, bilateral thoracic, epigastric, or back regions; Mixture: typical and atypical irradiation. §Median (interquartile range). ||Symptom clusters: cluster 1 (no symptom cluster) - low endorsement probabilities for all items; cluster 2 (dyspnoea and sweating cluster) - high probability for dyspnoea at rest and sweating; cluster 3 (multiple symptoms cluster) - high probabilities for all items (dyspnoea at rest, exertional dyspnoea, sweating, nausea, vomiting, dizziness, blurry vision, presyncope, syncope, palpitation, weakness, other symptoms, other digestive symptoms and discomfort). ¶p for age differences within each sex; #p for differences between sexes.

### Multivariate models

Despite the higher probability of women below or above 65 years old to present without pain than men, no differences were observed in the adjusted pain frequency and location between men and women. Referred pain was more likely to be experienced by women (<65 years old: adjusted odds ratio [OR] 2.90, 95% confidence interval [95% CI] 1.47-5.72; ≥65 years old: 1.60 (0.99-2.60), p for interaction=0.528)). Moreover, women below or above 65 years old had a higher probability of having pain radiating to typical and atypical locations and of feeling pain with an intensity higher than 8 (Table 3). The association between intensity of pain and female sex was stronger for patients below 65 years old (interaction p=0.028) (Table 3).

The presence of at least one symptom other than pain occurred almost two times more often in women than in men. With cluster 1 as the reference, cluster 2 and 3 were positively associated with female sex, with the latter being statistically significant. The multiple symptoms cluster was almost 4-fold more likely in women than in men (3.92, 2.21-6.98 in the whole sample, interaction p=0.501) (Table 3).

No difference in the type of patients' activities at the beginning of the episode by sex was observed (Table 3).

Performance of age stratified multivariate models using the 55 years old cut-off revealed similar results to the observed using the 65 years old cut-off, with some differences mainly in the strength of association of some clinical presentation variables with sex among the younger age group (Supplementary Table 4). Although still not significant, among patients below 55 years old, women were less likely to present with typical chest pain (0.65, 0.23-1.86). A stronger association between female sex and referred pain, and intensity of pain higher than 8/10, among patients in the younger age groups was observed using the 55 instead of the 65 years cut-off. The remaining results were similar in direction and strength of association (Table 3 and Supplementary Table 4). The precision of the estimates is lower using the 55 cut-off, due to the small sample of patients below 55 years old.

**Table 3. Differences between women and men in clinical presentation of acute coronary syndrome, by age group**  
(men are the reference class).

| Symptoms                                                 | <65 years |           | ≥65 years |             | Interaction p-value | Adjusted for                                                                               |
|----------------------------------------------------------|-----------|-----------|-----------|-------------|---------------------|--------------------------------------------------------------------------------------------|
|                                                          | OR        | 95% CI    | OR        | 95% CI      |                     |                                                                                            |
| <b>Pain</b>                                              | 0.76      | 0.14-4.0  | 0.52      | 0.19-1.47   | 0.777               | Age, type of ACS, marital status, dyslipidaemia, CABG                                      |
| <b>Typical (chest) pain</b><br>(vs atypical or mixture)* | 0.97      | 0.44-2.14 | 1.71      | 0.90-3.23   | 0.973               | Age, type of ACS, coronary anatomy, region, smoking, dyslipidaemia, previous heart failure |
| <b>Referred pain</b>                                     | 2.90      | 1.47-5.72 | 1.60      | 0.99-2.60   | 0.528               | Age, type of ACS, coronary anatomy, region, income, social class, previous renal failure.  |
| <b>Radiation type†</b>                                   |           |           |           |             |                     |                                                                                            |
| <b>Typical</b>                                           | 1         | Reference | 1         | Reference   |                     | Age, type of ACS, employment status, region                                                |
| <b>Atypical</b>                                          | 1.49      | 0.70-3.20 | 1.38      | 0.72-2.66   | 0.415               |                                                                                            |
| <b>Mixture</b>                                           | 1.77      | 0.73-4.29 | 2.75      | 1.36-5.57   | 0.606               |                                                                                            |
| <b>Pain intensity</b><br>(higher than 8/10)              | 3.81      | 2.04-7.13 | 2.03      | 1.22-3.37   | 0.028               | Age, type of ACS, coronary anatomy, education, professional group, previous AMI            |
| <b>Symptoms</b>                                          | 1.98      | 1.00-3.91 | 1.85      | 1.10-3.12   | 0.799               | Age, type of ACS, region, previous AMI, previous heart failure                             |
| <b>Symptom clusters‡</b>                                 |           |           |           |             |                     |                                                                                            |
| <b>Cluster 1</b>                                         | 1         | Reference | 1         | Reference   |                     | Age, type of ACS, professional group, region, previous AMI                                 |
| <b>Cluster 2</b>                                         | 1.07      | 0.53-2.15 | 1.67      | 0.97-2.87   | 0.246               |                                                                                            |
| <b>Cluster 3</b>                                         | 3.14      | 1.15-8.62 | 4.23      | 2.03-8.81   | 0.501               |                                                                                            |
| <b>Activity group</b>                                    |           |           |           |             |                     |                                                                                            |
| <b>Sleeping</b>                                          | 1         | Reference | 1         | (Reference) |                     | Age, type of ACS, previous heart failure                                                   |
| <b>Rest</b>                                              | 0.68      | 0.33-1.38 | 1.38      | 0.74-2.57   | 0.284               |                                                                                            |
| <b>Exertion</b>                                          | 0.77      | 0.37-1.59 | 1.70      | 0.89-3.25   | 0.408               |                                                                                            |

ACS, acute coronary syndrome; AMI, acute myocardial infarction; CABG: coronary artery bypass surgery; CI, confidence interval; OR, odds ratio.

\*Pain location: Typical - retrosternal, precordial, right thoracic, or bilateral thoracic; Atypical - epigastric, back, left arm or shoulder, right arm or shoulder, neck, or jaw; Mixture - typical and atypical location.

†Radiation type: Typical - left arm or shoulder, right arm or shoulder, neck, or jaw; Atypical: retrosternal, precordial, right thoracic, bilateral thoracic, epigastric, or back regions; Mixture: typical and atypical irradiation.

‡Symptom clusters: cluster 1 (no symptom cluster) - low endorsement probabilities for all items; cluster 2 (dyspnoea and sweating cluster) - high probability for dyspnoea at rest and sweating; cluster 3 (multiple symptoms cluster) - high probabilities for all items (dyspnoea at rest, exertional dyspnoea, sweating, nausea, vomiting, dizziness, blurry vision, presyncope, syncope, palpitation, weakness, other symptoms, other digestive symptoms and discomfort).



### Clinical presentation and outcomes

Patients with a diagnosis of STEMI/NC ACS who presented with atypical or mixture pain took longer to seek medical care (135 vs 85 min.,  $p=0.012$ ) and had longer total ischemic times (414 vs 328 min.,  $p=0.080$ ) than patients with chest pain (Table 4). Among patients with NSTEMI/ACS, differences in time delays according to pain location were not significant. Patients with atypical or mixture pain presented more frequently with hemodynamic instability at admission (9.7% vs 4.6%,  $p=0.014$ ) and had also more often moderate to severe left ventricular systolic dysfunction (32.9 vs 24.9%,  $p=0.052$ ) than patients with chest pain. The 30-day mortality adjusted for GRACE 2.0 was not significantly different between patients with chest pain and those with atypical or mixture pain (Table 4).

Among patients with STEMI/NC ACS, the total ischemic time was longer for patients with the multiple symptoms cluster compared with patients who presented with the two other symptoms clusters (533 minutes vs 321 and 384,  $p=0.111$ ). Patients with the multiple symptom cluster presented more often with hemodynamic instability at admission than patients with the other symptoms clusters (13.4% vs 6.4% and 4.2%,  $p=0.034$ ). The mean 30-day mortality rate adjusted for the GRACE 2.0 risk score was significantly higher for patients presenting with the multiple symptom cluster (4.9% vs 0.9% for the two other clusters,  $p<0.001$ ) (Table 4).

Patients with atypical or mixture chest pain and patients with the multiple symptom cluster had higher mean GRACE and median CRUSADE risk scores (Table 4).

**Table 4.** Patient and system delays, severity indicators, risk stratification and 30-day mortality according to clinical presentation\*

|                                                                               | Typical (chest) pain† | Atypical or mixture pain | p      | No symptom cluster ‡ | Dyspnoea and sweating cluster | Multiple symptoms cluster | p      |
|-------------------------------------------------------------------------------|-----------------------|--------------------------|--------|----------------------|-------------------------------|---------------------------|--------|
| <b>Patient and system delays, median (IQR)</b>                                |                       |                          |        |                      |                               |                           |        |
| <b>STEMI/NC ACS</b>                                                           |                       |                          |        |                      |                               |                           |        |
| Symptom onset – FMC (min)                                                     | 85 (45-210)           | 135 (65-325)             | 0.012  | 90 (46-240)          | 90 (50-185)                   | 83 (45-430)               | 0.872  |
| Symptom onset-arterial access (min)                                           | 328 (192-1075)        | 414 (246-1335)           | 0.080  | 321 (194-1011)       | 384 (201-1440)                | 533 (323-1428)            | 0.111  |
| <b>NSTEMACS</b>                                                               |                       |                          |        |                      |                               |                           |        |
| Symptom onset – FMC (min)                                                     | 130 (60-393)          | 139 (60-335)             | 0.633  | 135 (60-390)         | 150 (60-390)                  | 113 (45-393)              | 0.795  |
| Hospital admission- coronary angiography time (hours)                         | 30 (18-57)            | 29 (20-48)               | 0.884  | 30 (18-56)           | 35 (18-70)                    | 28 (20-72)                | 0.385  |
| <b>Admission variables</b>                                                    |                       |                          |        |                      |                               |                           |        |
| Heart rate, mean (SD), bpm                                                    | 77 (18)               | 80 (24)                  | 0.117  | 78 (19)              | 77 (19)                       | 78 (28)                   | 0.923  |
| Systolic blood pressure, mean (SD), mmHg                                      | 144 (49)              | 139 (30)                 | 0.212  | 145 (59)             | 141 (30)                      | 136 (33)                  | 0.364  |
| Hemodynamic instability at admission§                                         | 32 (4.6)              | 14 (9.7)                 | 0.014  | 41 (6.4)             | 7 (4.2)                       | 9 (13.4)                  | 0.034  |
| <b>Risk stratification</b>                                                    |                       |                          |        |                      |                               |                           |        |
| Calculated GRACE risk score, mean (SD)                                        | 134 (36)              | 147 (39)                 | <0.001 | 137 (37)             | 138 (35)                      | 149 (44)                  | 0.041  |
| Calculated CRUSADE risk score, median (IQR)                                   | 21 (11-34)            | 25 (14-41)               | 0.012  | 22 (12-36)           | 23 (10-36)                    | 30 (16-47)                | 0.019  |
| <b>Moderate or severe left ventricular systolic dysfunction</b>               | 169 (24.9)            | 46 (32.9)                | 0.052  | 164 (26.4)           | 55 (33.3)                     | 17 (25.4)                 | 0.187  |
| <b>30-day mortality rate adjusted for the GRACE 2.0 risk score, mean (SD)</b> | 2.0 (4.0)             | 1.3 (1.4)                | 0.521  | 0.9 (2.0)            | 0.9 (2.0)                     | 4.9 (5.5)                 | <0.001 |

IQR, interquartile range; NSTEMACS, non-ST elevation acute coronary syndrome; SD, standard deviation; STEMI/NC ACS, ST elevation myocardial infarction/Non-classifiable acute coronary syndrome.

\*Values are number and percentage unless otherwise indicated.

Total may not add to 100% due to missing data.

†Chest pain: retrosternal, precordial, right thoracic, or bilateral thoracic.

‡No symptom cluster: low endorsement probabilities for all items; Dyspnoea and sweating cluster: high probability for dyspnoea at rest and sweating; Multiple symptoms cluster: high probabilities for all items (dyspnoea at rest, exertional dyspnoea, sweating, nausea, vomiting, dizziness, blurry vision, presyncope, syncope, palpitation, weakness, other symptoms, other digestive symptoms and discomfort)

§Killip class III or IV; or shock at admission.

## DISCUSSION

In our study, after adjustment, no differences in the frequency and location of pain by sex were observed. Referred pain, pain radiating to typical and atypical locations, and pain of higher intensity were more likely to occur among women. Women were also more likely than men to present with symptoms other than pain. Three clusters of symptoms other than pain were identified. Women were more likely to present with the multiple symptoms cluster. Presenting with the multiple symptoms cluster was associated with a higher mean 30-day mortality rate adjusted for the GRACE 2.0 risk score.

Differences between women and men in perception of symptoms of ACS might be explained by anatomical, physiological, biological, and psychosocial differences that influence each other.<sup>9, 21</sup> We measured several variables of these different domains. Differences in symptom presentation by sex might be the result of differences in response to history-taking,<sup>10</sup> differences in neural receptors and pathways involved in pain, and subtle differences in the location and type of atherosclerotic lesions.<sup>22, 23</sup> Our findings of similar ACS symptoms between women and men are consistent with previous studies,<sup>7, 24</sup> as well as our finding that women are more likely to have atypical presentations.<sup>9</sup> We observed that women have a higher likelihood of atypical referred pain and of several concomitant symptoms other than pain, common to other cardiac and non-cardiac diagnoses.

In our study, chest pain was the most frequent symptom in both sexes, consistent with previous studies.<sup>25-27</sup> Among those with pain, typical chest pain was observed in 82% of patients, regardless of sex. The remaining patients had pain in less typical locations and were thus prone to misdiagnosis and undertreatment and, consequently, to worse outcomes.<sup>28</sup> Considering differences in characteristics of pain by sex, studies suggested that women, in particular older women, were less likely to have the chief complaint of chest pain associated with acute myocardial infarction; while after adjustment, among patients with 65 or less years old, female sex was no longer a significant predictor.<sup>29</sup> Studies reported that chest pain did not differ between women and men,<sup>9</sup> others that women have pain in the neck and back more often than men,<sup>30, 31</sup> without distinguishing between direct and referred pain. In our study, referred pain was observed in 61% of patients, was more frequent in women, and typical referred pain was only observed in 33%. Notably, a study on diagnostic acuity of ACS symptoms showed that shoulder and arm pain was predictive of the diagnosis of ACS for women only.<sup>24</sup> Another study (GENESIS PRAXY) on sex differences in ACS symptom presentation in patients with 55 years old or younger showed that being a woman was independently associated with ACS presentation without chest pain.<sup>27</sup> Although the

1  
2  
3 association was not significant, and relied on a small sample of patients, our finding that women with 55  
4 years old or younger were less likely to present with typical chest pain is in line with the GENESIS  
5 PRAXY study result.<sup>27</sup> Furthermore it stresses the relevance of taking into account age for studying the  
6 association between sex and clinical presentation. Differences in age distribution, in clinical presentation  
7 measuring, in selection and definition of confounder variables limit conclusive comparisons of studies  
8 evaluating differences in frequency and location of pain between women and men.

9  
10  
11  
12  
13 According to previous studies, with regard to other symptoms, a higher proportion of women have less  
14 typical symptoms than men.<sup>8, 31</sup> Women have also reported other symptoms, such as indigestion,  
15 palpitations, nausea, numbness in the hands, and unusual fatigue, more frequently than men.<sup>9</sup> In our  
16 cohort, three symptom clusters were identified. Women had the multiple symptoms cluster more  
17 frequently than did men, characterized by high probabilities for all symptoms. According to Rosenfeld et  
18 al. women are more likely to cluster in a similar class, called the heavy symptom burden class.<sup>32</sup> With  
19 regard to ACS symptom clustering, there are contradictory findings on identified clusters, the proportion  
20 of patients per cluster, and differences between clusters regarding demographic factors. In our study,  
21 cluster 1 and 3 (low and high probabilities for all symptoms, respectively) are in line with observations of  
22 other settings.<sup>18, 33</sup> A recent systematic review of symptom clusters in cardiovascular disease<sup>34</sup> identified  
23 clusters with the most symptoms and clusters with the lowest number of symptoms. Our dyspnoea and  
24 sweating cluster has two common symptoms with the Riegel et al.<sup>26</sup> stress symptoms cluster, which  
25 includes shortness of breath, sweating, nausea, indigestion, dread, and anxiety.

26  
27  
28  
29  
30  
31  
32  
33  
34  
35  
36  
37 Methodological differences related to sampling and measuring might explain these different results.  
38  
39  
40  
41  
42  
43  
44  
45  
46  
47  
48  
49  
50  
51  
52  
53  
54  
55  
56  
57  
58  
59  
60

61  
62  
63  
64  
65  
66  
67  
68  
69  
70  
71  
72  
73  
74  
75  
76  
77  
78  
79  
80  
81  
82  
83  
84  
85  
86  
87  
88  
89  
90  
91  
92  
93  
94  
95  
96  
97  
98  
99  
100  
101  
102  
103  
104  
105  
106  
107  
108  
109  
110  
111  
112  
113  
114  
115  
116  
117  
118  
119  
120  
121  
122  
123  
124  
125  
126  
127  
128  
129  
130  
131  
132  
133  
134  
135  
136  
137  
138  
139  
140  
141  
142  
143  
144  
145  
146  
147  
148  
149  
150  
151  
152  
153  
154  
155  
156  
157  
158  
159  
160  
161  
162  
163  
164  
165  
166  
167  
168  
169  
170  
171  
172  
173  
174  
175  
176  
177  
178  
179  
180  
181  
182  
183  
184  
185  
186  
187  
188  
189  
190  
191  
192  
193  
194  
195  
196  
197  
198  
199  
200  
201  
202  
203  
204  
205  
206  
207  
208  
209  
210  
211  
212  
213  
214  
215  
216  
217  
218  
219  
220  
221  
222  
223  
224  
225  
226  
227  
228  
229  
230  
231  
232  
233  
234  
235  
236  
237  
238  
239  
240  
241  
242  
243  
244  
245  
246  
247  
248  
249  
250  
251  
252  
253  
254  
255  
256  
257  
258  
259  
260  
261  
262  
263  
264  
265  
266  
267  
268  
269  
270  
271  
272  
273  
274  
275  
276  
277  
278  
279  
280  
281  
282  
283  
284  
285  
286  
287  
288  
289  
290  
291  
292  
293  
294  
295  
296  
297  
298  
299  
300  
301  
302  
303  
304  
305  
306  
307  
308  
309  
310  
311  
312  
313  
314  
315  
316  
317  
318  
319  
320  
321  
322  
323  
324  
325  
326  
327  
328  
329  
330  
331  
332  
333  
334  
335  
336  
337  
338  
339  
340  
341  
342  
343  
344  
345  
346  
347  
348  
349  
350  
351  
352  
353  
354  
355  
356  
357  
358  
359  
360  
361  
362  
363  
364  
365  
366  
367  
368  
369  
370  
371  
372  
373  
374  
375  
376  
377  
378  
379  
380  
381  
382  
383  
384  
385  
386  
387  
388  
389  
390  
391  
392  
393  
394  
395  
396  
397  
398  
399  
400  
401  
402  
403  
404  
405  
406  
407  
408  
409  
410  
411  
412  
413  
414  
415  
416  
417  
418  
419  
420  
421  
422  
423  
424  
425  
426  
427  
428  
429  
430  
431  
432  
433  
434  
435  
436  
437  
438  
439  
440  
441  
442  
443  
444  
445  
446  
447  
448  
449  
450  
451  
452  
453  
454  
455  
456  
457  
458  
459  
460  
461  
462  
463  
464  
465  
466  
467  
468  
469  
470  
471  
472  
473  
474  
475  
476  
477  
478  
479  
480  
481  
482  
483  
484  
485  
486  
487  
488  
489  
490  
491  
492  
493  
494  
495  
496  
497  
498  
499  
500  
501  
502  
503  
504  
505  
506  
507  
508  
509  
510  
511  
512  
513  
514  
515  
516  
517  
518  
519  
520  
521  
522  
523  
524  
525  
526  
527  
528  
529  
530  
531  
532  
533  
534  
535  
536  
537  
538  
539  
540  
541  
542  
543  
544  
545  
546  
547  
548  
549  
550  
551  
552  
553  
554  
555  
556  
557  
558  
559  
560  
561  
562  
563  
564  
565  
566  
567  
568  
569  
570  
571  
572  
573  
574  
575  
576  
577  
578  
579  
580  
581  
582  
583  
584  
585  
586  
587  
588  
589  
590  
591  
592  
593  
594  
595  
596  
597  
598  
599  
600  
601  
602  
603  
604  
605  
606  
607  
608  
609  
610  
611  
612  
613  
614  
615  
616  
617  
618  
619  
620  
621  
622  
623  
624  
625  
626  
627  
628  
629  
630  
631  
632  
633  
634  
635  
636  
637  
638  
639  
640  
641  
642  
643  
644  
645  
646  
647  
648  
649  
650  
651  
652  
653  
654  
655  
656  
657  
658  
659  
660  
661  
662  
663  
664  
665  
666  
667  
668  
669  
670  
671  
672  
673  
674  
675  
676  
677  
678  
679  
680  
681  
682  
683  
684  
685  
686  
687  
688  
689  
690  
691  
692  
693  
694  
695  
696  
697  
698  
699  
700  
701  
702  
703  
704  
705  
706  
707  
708  
709  
710  
711  
712  
713  
714  
715  
716  
717  
718  
719  
720  
721  
722  
723  
724  
725  
726  
727  
728  
729  
730  
731  
732  
733  
734  
735  
736  
737  
738  
739  
740  
741  
742  
743  
744  
745  
746  
747  
748  
749  
750  
751  
752  
753  
754  
755  
756  
757  
758  
759  
760  
761  
762  
763  
764  
765  
766  
767  
768  
769  
770  
771  
772  
773  
774  
775  
776  
777  
778  
779  
780  
781  
782  
783  
784  
785  
786  
787  
788  
789  
790  
791  
792  
793  
794  
795  
796  
797  
798  
799  
800  
801  
802  
803  
804  
805  
806  
807  
808  
809  
810  
811  
812  
813  
814  
815  
816  
817  
818  
819  
820  
821  
822  
823  
824  
825  
826  
827  
828  
829  
830  
831  
832  
833  
834  
835  
836  
837  
838  
839  
840  
841  
842  
843  
844  
845  
846  
847  
848  
849  
850  
851  
852  
853  
854  
855  
856  
857  
858  
859  
860  
861  
862  
863  
864  
865  
866  
867  
868  
869  
870  
871  
872  
873  
874  
875  
876  
877  
878  
879  
880  
881  
882  
883  
884  
885  
886  
887  
888  
889  
890  
891  
892  
893  
894  
895  
896  
897  
898  
899  
900  
901  
902  
903  
904  
905  
906  
907  
908  
909  
910  
911  
912  
913  
914  
915  
916  
917  
918  
919  
920  
921  
922  
923  
924  
925  
926  
927  
928  
929  
930  
931  
932  
933  
934  
935  
936  
937  
938  
939  
940  
941  
942  
943  
944  
945  
946  
947  
948  
949  
950  
951  
952  
953  
954  
955  
956  
957  
958  
959  
960  
961  
962  
963  
964  
965  
966  
967  
968  
969  
970  
971  
972  
973  
974  
975  
976  
977  
978  
979  
980  
981  
982  
983  
984  
985  
986  
987  
988  
989  
990  
991  
992  
993  
994  
995  
996  
997  
998  
999  
1000

1  
2  
3 accuracy. Public health messages should take into account the complexity of presenting symptoms of  
4 ACS, particularly the significant proportion of women and men with ACS without typical chest pain.  
5  
6 Additionally, there is a higher likelihood of atypical referred pain and multiple concomitant symptoms in  
7  
8 women. These factors should be accounted for to encourage timely and appropriate care of patients with  
9  
10 ACS.

11  
12 Presenting without chest pain and with the multiple symptoms cluster was associated with several  
13  
14 markers of higher ACS severity and longer time delays, particularly significant among patients with  
15  
16 STEMI/NC ACS. In our study, presenting with the multiple symptoms cluster, but not with atypical or  
17  
18 mixture location of pain, was associated with a higher mean 30-day mortality adjusted for GRACE risk  
19  
20 score. These results are consistent with data from the GRACE registry, that showed that patients with  
21  
22 symptoms other than pain experienced greater morbidity and higher in-hospital mortality across the  
23  
24 spectrum of ACS.<sup>28</sup> Other registry showed that the higher in-hospital mortality observed among women  
25  
26 and men without chest pain, decreased or even reversed with advanced age.<sup>39</sup> Mortality is adjusted for  
27  
28 GRACE risk score, however we cannot conclude that the difference in outcome observed is explained by  
29  
30 symptoms other than pain per se. Previous studies showed that the higher in-hospital mortality of ACS  
31  
32 patients who presented without chest pain was mostly due to late hospital arrival, comorbidities and  
33  
34 underuse of medications and invasive procedures.<sup>6, 39, 40</sup> These studies focused mainly on presence of  
35  
36 chest pain to define atypical presentation and used medical record reviews to characterize clinical  
37  
38 presentation. More studies are needed to further explore the association between symptoms other than  
39  
40 pain and outcomes.

#### 41 42 **Limitations**

43  
44 Participants were interviewed as soon as possible after admission, but this does not obviate the  
45  
46 retrospective nature of data collection and the possibility of recall bias. Furthermore preceding interviews  
47  
48 by physicians may have influenced answers to the questionnaire, however different consequences in  
49  
50 women and men are not expected. The results of this study are valid for stable patients, who were  
51  
52 admitted to the hospital and were able to answer the questionnaire in the acute phase of ACS. This type of  
53  
54 study misses patients who die before reaching the hospital, patients who do not seek medical care,  
55  
56 patients who are mistakenly discharged or misdiagnosed and admitted to non-cardiology departments.

1  
2  
3 This sample selection process may contribute to underestimate the true prevalence of ACS atypical  
4 presentation in women and men.<sup>27</sup> For patients who were eligible but not enrolled only information on  
5 sex, age and type of ACS was available. Patients who died before the interview were older (81.5±11.8 vs  
6 64.6±13.1 years,  $p<0.001$ ), were more often women (66.7% vs 26.0%,  $p<0.001$ ), and more frequently had  
7 a diagnosis of STEMI (81.3% vs 43.4%,  $p=0.003$ ) than did participants. Patients who were discharged or  
8 transferred to another hospital before the interview had STEMI less often (25.0% vs 43.4%,  $p=0.005$ ) and  
9 patients who were not enrolled because of clinical instability or inability to understand the questionnaire  
10 were older. Patients who refused to participate were older (72.7±11.0 vs 64.0±13.0 years,  $p<0.001$ ), were  
11 less often partnered (65.7% vs 76.8%,  $p=0.036$ ), and had little formal education (43.1% vs 19.7%,  
12  $p<0.001$ ) compared with participants. Except for deceased patients, no difference in sex proportion was  
13 observed between participants and non-participants. We cannot exclude that some of the sex differences  
14 were caused by selection bias because of a higher risk of non-inclusion of women due to death in the  
15 early hours of admission, or due to a possible higher probability of misdiagnosis in women, particularly  
16 those with unstable angina.<sup>41</sup> Considering that atypical presentation is associated with a worse prognosis  
17 and with a higher probability of misdiagnosis, the proportion of patients with ACS presenting without  
18 typical chest pain or that of women with an atypical presentation could be even higher.<sup>28</sup>  
19  
20  
21  
22  
23  
24  
25  
26  
27  
28  
29  
30  
31  
32

### 33 CONCLUSION

34  
35 This study shows no significant differences in the frequency and location of pain by sex, but  
36 approximately 20% of patients do not present with chest pain, regardless of sex. Women are more likely  
37 to report referred pain and multiple symptoms simultaneously. Presentation with the multiple symptoms  
38 cluster pain is associated with higher 30-day mortality adjusted for GRACE score. Health education  
39 messages should take into account the complexity of presentation of ACS and emphasize the possible  
40 non-chest location of pain in both sexes and the higher probability of concomitant symptoms other than  
41 pain in women. Further sex-stratified analysis of ACS presentation, also addressing the role of age for the  
42 relation between sex and clinical presentation, is required to determine the diagnostic accuracy of  
43 symptoms by sex.  
44  
45  
46  
47  
48  
49  
50  
51  
52  
53  
54  
55  
56  
57  
58  
59  
60

1  
2  
3  
4  
5  
6  
7  
8  
9  
10  
11  
12  
13  
14  
15  
16  
17  
18  
19  
20  
21  
22  
23  
24  
25  
26  
27  
28  
29  
30  
31  
32  
33  
34  
35  
36  
37  
38  
39  
40  
41  
42  
43  
44  
45  
46  
47  
48  
49  
50  
51  
52  
53  
54  
55  
56  
57  
58  
59  
60

**Figure 1.** Flow chart of the study population

For peer review only

1  
2  
3 **Funding:** This study was funded by FEDER through the Operational Programme Competitiveness and  
4 Internationalization and national funding from the Foundation for Science and Technology – FCT  
5 (Portuguese Ministry of Science, Technology and Higher Education) (FCOMP-01-0124-FEDER-  
6 028709), under the project “Inequalities in coronary heart disease management and outcomes in Portugal”  
7 (Ref. FCT PTDC/DTP-EPI/0434/2012) and Unidade de Investigação em Epidemiologia - Instituto de  
8 Saúde Pública da Universidade do Porto (EPIUnit) (POCI-01-0145-FEDER-006862;  
9 Ref.UID/DTP/04750/2013).

10  
11  
12  
13  
14  
15  
16  
17 **Conflicts of interest:** All authors have completed the ICMJE uniform disclosure form at  
18 [www.icmje.org/coi\\_disclosure.pdf](http://www.icmje.org/coi_disclosure.pdf) and declare: all authors had financial support through grants from the  
19 Foundation for Science and Technology – FCT (Portuguese Ministry of Science, Technology and Higher  
20 Education) and from Unidade de Investigação em Epidemiologia - Instituto de Saúde Pública da  
21 Universidade do Porto. No financial relationships with any organisations that might have an interest in the  
22 submitted work in the previous three years; no other relationships or activities that could appear to have  
23 influenced the submitted work.

### 31 **Contributors**

32  
33 Carla Araújo and Ana Azevedo had the original idea to develop the EPIHeart cohort study and were  
34 responsible for acquiring the study grant. Carla Araújo raised the hypotheses, participated in data  
35 collection and field work, analysed and interpreted the data, and drafted the first version of the  
36 manuscript. Olga Laszczyńska analysed and interpreted the data, participated in drafting and revising the  
37 first draft of the manuscript. Marta Viana and Andreia Borges participated in data collection, field work  
38 and interpretation of the data. Filipa Melão and Ana Henriques interpreted data. Milton Severo analysed  
39 and interpreted the data. Maria Júlia Maciel and Ilídio Moreira were involved in the conception of the  
40 study and in field work. Ana Azevedo was the responsible for the conception and development of the  
41 study, analysed and interpreted the data, participated in drafting and revising the first draft of the  
42 manuscript. All authors were involved in writing the paper, in revising it critically and approved the final  
43 version of the submitted manuscript.

### 53 **Data sharing**

54  
55 Data are available by email the corresponding author at [carla-r-araujo@hotmail.com](mailto:carla-r-araujo@hotmail.com).



## References

1. Mendis S, Global Status Report on noncommunicable diseases 2014. Report, World Health Organization, 2014.
2. Nichols M, Townsend N, Scarborough P and Rayner M. Cardiovascular disease in Europe 2014: epidemiological update. *Eur Heart J* 2014; 35: 2929.
3. Canto JG, Rogers WJ, Goldberg RJ, et al. Association of age and sex with myocardial infarction symptom presentation and in-hospital mortality. *JAMA* 2012; 307: 813-22.
4. Doggen CJ, Zwerink M, Droste HM, et al. Prehospital paths and hospital arrival time of patients with acute coronary syndrome or stroke, a prospective observational study. *BMC Emerg Med* 2016; 16: 3.
5. Annemans L, Danchin N, Van de Werf F, et al. Prehospital and in-hospital use of healthcare resources in patients surviving acute coronary syndromes: an analysis of the EPICOR registry. *Open Heart* 2016; 3: e000347.
6. Manfrini O, Ricci B, Cenko E, et al. Association between comorbidities and absence of chest pain in acute coronary syndrome with in-hospital outcome. *Int J Cardiol* 2016; 217 Suppl: S37-43.
7. DeVon HA and Zerwic JJ. Symptoms of acute coronary syndromes: are there gender differences? A review of the literature. *Heart Lung* 2002; 31: 235-45.
8. DeVon HA and Zerwic JJ. The symptoms of unstable angina: do women and men differ? *Nurs Res* 2003; 52: 108-18.
9. DeVon HA, Ryan CJ, Ochs AL and Shapiro M. Symptoms across the continuum of acute coronary syndromes: differences between women and men. *Am J Crit Care* 2008; 17: 14-24.
10. Safdar B, Nagurney JT, Anise A, et al. Gender-specific research for emergency diagnosis and management of ischemic heart disease: proceedings from the 2014 Academic Emergency Medicine Consensus Conference Cardiovascular Research Workgroup. *Acad Emerg Med* 2014; 21: 1350-60.
11. Thygesen K, Alpert JS, Jaffe AS, et al. Third universal definition of myocardial infarction. *Eur Heart J* 2012; 33: 2551-67.
12. Statistics. Statistics Portugal. "Portuguese Classification of Occupations 2010" [accessed on November 15, 2016]. Available at: [https://www.ine.pt/xportal/xmain?xpid=INE&xpgid=ine\\_publicacoes&PUBLICACOESpub\\_boui=107961853&PUBLICACOESmodo=2](https://www.ine.pt/xportal/xmain?xpid=INE&xpgid=ine_publicacoes&PUBLICACOESpub_boui=107961853&PUBLICACOESmodo=2). 2011.
13. Swap CJ and Nagurney JT. Value and limitations of chest pain history in the evaluation of patients with suspected acute coronary syndromes. *JAMA* 2005; 294: 2623-9.
14. Eslick GD. Usefulness of chest pain character and location as diagnostic indicators of an acute coronary syndrome. *Am J Cardiol* 2005; 95: 1228-31.
15. Canto AJ, Kiefe CI, Goldberg RJ, et al. Differences in symptom presentation and hospital mortality according to type of acute myocardial infarction. *Am Heart J* 2012; 163: 572-9.
16. Roffi M, Patrono C, Collet JP, et al. 2015 ESC Guidelines for the management of acute coronary syndromes in patients presenting without persistent ST-segment elevation: Task Force for the Management of Acute Coronary Syndromes in Patients Presenting without Persistent ST-Segment Elevation of the European Society of Cardiology (ESC). *Eur Heart J* 2016; 37: 267-315.
17. Amsterdam EA, Wenger NK, Brindis RG, et al. 2014 AHA/ACC guideline for the management of patients with non-ST-elevation acute coronary syndromes: a report of the American College of Cardiology/American Heart Association Task Force on Practice Guidelines. *Circulation* 2014; 130: e344-426.
18. Ryan CJ, DeVon HA, Horne R, et al. Symptom clusters in acute myocardial infarction: a secondary data analysis. *Nurs Res* 2007; 56: 72-81.
19. Miaskowski C, Dodd M and Lee K. Symptom clusters: the new frontier in symptom management research. *J Natl Cancer Inst Monogr* 2004: 17-21.

20. Schiele F, Gale CP, Bonnefoy E, et al. Quality indicators for acute myocardial infarction: A position paper of the Acute Cardiovascular Care Association. *Eur Heart J Acute Cardiovasc Care* 2017; 6: 34-59.
21. Legato MJ. Gender and the heart: sex-specific differences in normal anatomy and physiology. *J Genet Specif Med* 2000; 3: 15-8.
22. Foreman RD. Mechanisms of cardiac pain. *Annu Rev Physiol* 1999; 61: 143-67.
23. Arslanian-Engoren C and Engoren M. Physiological and anatomical bases for sex differences in pain and nausea as presenting symptoms of acute coronary syndromes. *Heart Lung* 2010; 39: 386-93.
24. Devon HA, Rosenfeld A, Steffen AD and Daya M. Sensitivity, specificity, and sex differences in symptoms reported on the 13-item acute coronary syndrome checklist. *J Am Heart Assoc* 2014; 3: e000586.
25. Arslanian-Engoren C, Patel A, Fang J, et al. Symptoms of men and women presenting with acute coronary syndromes. *Am J Cardiol* 2006; 98: 1177-81.
26. Riegel B, Hanlon AL, McKinley S, et al. Differences in mortality in acute coronary syndrome symptom clusters. *Am Heart J* 2010; 159: 392-8.
27. Khan NA, Daskalopoulou SS, Karp I, et al. Sex differences in acute coronary syndrome symptom presentation in young patients. *JAMA Intern Med* 2013; 173: 1863-71.
28. Brieger D, Eagle KA, Goodman SG, et al. Acute coronary syndromes without chest pain, an underdiagnosed and undertreated high-risk group: insights from the Global Registry of Acute Coronary Events. *Chest* 2004; 126: 461-9.
29. Milner KA, Vaccarino V, Arnold AL, Funk M and Goldberg RJ. Gender and age differences in chief complaints of acute myocardial infarction (Worcester Heart Attack Study). *Am J Cardiol* 2004; 93: 606-8.
30. Everts B, Karlson BW, Wahrborg P, Hedner T and Herlitz J. Localization of pain in suspected acute myocardial infarction in relation to final diagnosis, age and sex, and site and type of infarction. *Heart Lung* 1996; 25: 430-7.
31. Goldberg R, Goff D, Cooper L, et al. Age and sex differences in presentation of symptoms among patients with acute coronary disease: the REACT Trial. Rapid Early Action for Coronary Treatment. *Coron Artery Dis* 2000; 11: 399-407.
32. Rosenfeld AG, Knight EP, Steffen A, et al. Symptom clusters in patients presenting to the emergency department with possible acute coronary syndrome differ by sex, age, and discharge diagnosis. *Heart Lung* 2015; 44: 368-75.
33. Lindgren TG, Fukuoka Y, Rankin SH, et al. Cluster analysis of elderly cardiac patients' prehospital symptomatology. *Nurs Res* 2008; 57: 14-23.
34. DeVon HA, Vuckovic K, Ryan CJ, et al. Systematic review of symptom clusters in cardiovascular disease. *Eur J Cardiovasc Nurs* 2017; 16: 6-17.
35. Swap CJ and Nagurney JT. Value and limitations of chest pain history in the evaluation of patients with suspected acute coronary syndromes. *JAMA* 2005; 294: 2623-9.
36. Bruyninckx R, Aertgeerts B, Bruyninckx P and Buntinx F. Signs and symptoms in diagnosing acute myocardial infarction and acute coronary syndrome: a diagnostic meta-analysis. *Br J Gen Pract* 2008; 58: 105-11.
37. Rubini Gimenez M, Reiter M, Twerenbold R and et al. Sex-specific chest pain characteristics in the early diagnosis of acute myocardial infarction. *JAMA Intern Med* 2014; 174: 241-9.
38. Kamali A, Soderholm M and Ekelund U. What decides the suspicion of acute coronary syndrome in acute chest pain patients? *BMC Emerg Med* 2014; 14: 9.
39. Canto JG, Rogers WJ, Goldberg RJ, et al. Association of Age and Sex With Myocardial Infarction Symptom Presentation and In-Hospital Mortality. *JAMA* 2012; 307: 813-22.
40. Canto JG, Shlipak MG, Rogers WJ, et al. Prevalence, clinical characteristics, and mortality among patients with myocardial infarction presenting without chest pain. *JAMA* 2000; 283: 3223-9.

1  
2  
3  
4  
5  
6  
7  
8  
9  
10  
11  
12  
13  
14  
15  
16  
17  
18  
19  
20  
21  
22  
23  
24  
25  
26  
27  
28  
29  
30  
31  
32  
33  
34  
35  
36  
37  
38  
39  
40  
41  
42  
43  
44  
45  
46  
47  
48  
49  
50  
51  
52  
53  
54  
55  
56  
57  
58  
59  
60

41. Pope JH, Aufderheide TP, Ruthazer R, et al. Missed diagnoses of acute cardiac ischemia in the emergency department. *N Engl J Med* 2000; 342: 1163-70.

For peer review only

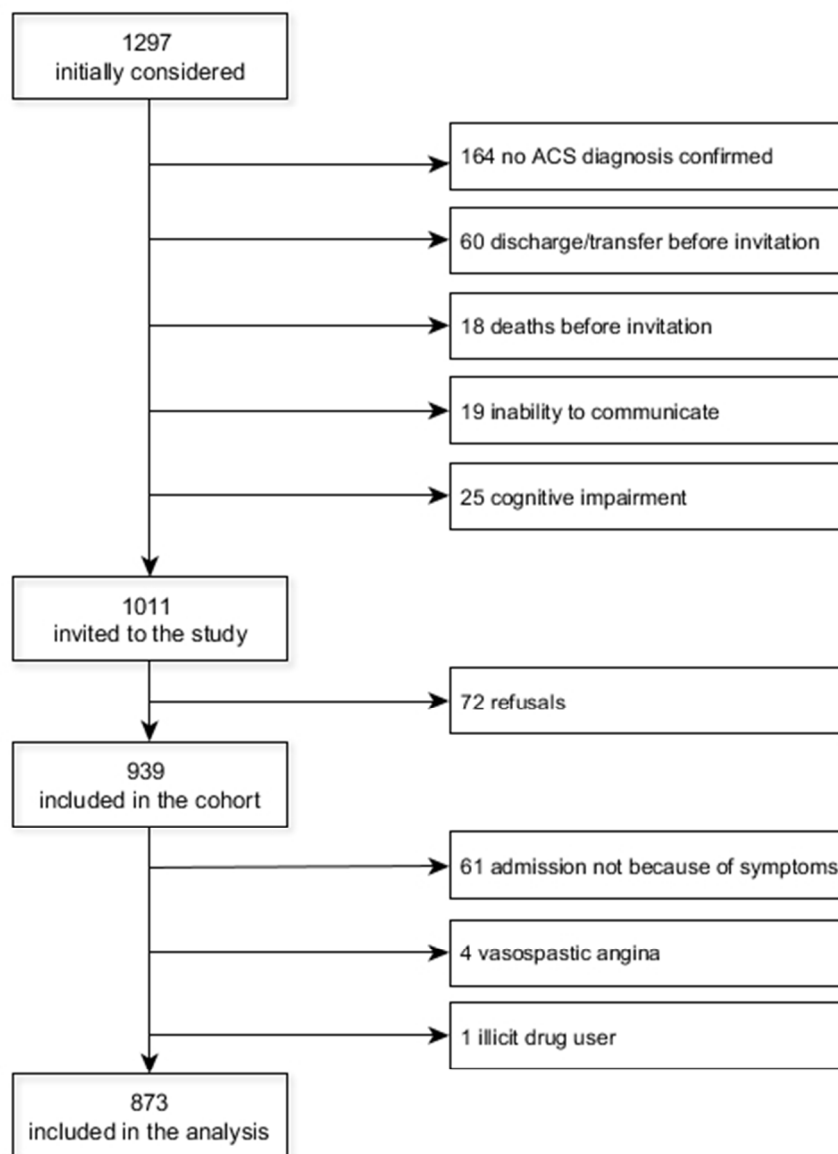

Figure 1. Flow chart of the study population

41x56mm (300 x 300 DPI)

Supplementary Table 1. Clinical presentation of patients with ST elevation myocardial infarction/non-classifiable acute coronary syndrome, by sex and age\*

|                                      | Women      |           |           |           |             | P <sup>†</sup> | Men        |            |           |             |            | P <sup>†</sup> | P <sup>#</sup> |
|--------------------------------------|------------|-----------|-----------|-----------|-------------|----------------|------------|------------|-----------|-------------|------------|----------------|----------------|
|                                      | <=45       | 46-64     | 65-79     | >=80      | Total       |                | <=45       | 46-64      | 65-79     | >=80        | Total      |                |                |
| <b>Total</b>                         | 6 (5.9)    | 22 (21.8) | 53 (52.5) | 20 (19.8) | 101 (100.0) |                | 37 (13.3)  | 144 (51.8) | 77 (27.7) | 20 (7.2)    | 278 (100)  |                |                |
| <b>Pain</b>                          | 6 (100.0)  | 21 (95.5) | 52 (98.1) | 16 (80.0) | 95 (94.1)   | 0.039          | 36 (97.3)  | 142 (98.6) | 73 (94.8) | 20 (100.0)  | 271 (97.5) | 0.338          | 0.106          |
| <b>Pain location<sup>†</sup></b>     |            |           |           |           |             |                |            |            |           |             |            |                |                |
| <b>Typical</b>                       | 5 (83.3)   | 17 (81.0) | 44 (84.6) | 9 (56.3)  | 75 (78.9)   |                | 31 (88.6)  | 120 (85.1) | 55 (76.4) | 13 (65.0)   | 219 (81.7) |                |                |
| <b>Atypical</b>                      | 1 (16.7)   | 4 (19.0)  | 2 (3.8)   | 5 (31.3)  | 12 (12.6)   |                | 1 (2.9)    | 17 (12.1)  | 14 (19.4) | 5 (25.0)    | 37 (13.8)  |                |                |
| <b>Mixture</b>                       | 0 (0.0)    | 0 (0.0)   | 6 (11.5)  | 2 (12.5)  | 8 (8.4)     | 0.021          | 3 (8.6)    | 4 (2.8)    | 3 (4.2)   | 2 (10.2)    | 12 (4.5)   | 0.032          | 0.347          |
| <b>Referred pain</b>                 | 4 (66.7)   | 18 (85.7) | 38 (73.1) | 8 (50.0)  | 68 (71.6)   | 0.114          | 24 (66.7)  | 90 (63.4)  | 51 (69.9) | 7 (35.0)    | 172 (63.5) | 0.038          | 0.152          |
| <b>Radiation type<sup>‡</sup></b>    |            |           |           |           |             |                |            |            |           |             |            |                |                |
| <b>Typical</b>                       | 3 (75.0)   | 8 (44.4)  | 17 (44.7) | 1 (12.5)  | 29 (42.6)   |                | 19 (79.2)  | 53 (59.6)  | 26 (51.0) | 3 (42.9)    | 101 (59.1) |                |                |
| <b>Atypical</b>                      | 0 (0.0)    | 5 (27.8)  | 10 (26.3) | 4 (50.0)  | 19 (27.9)   |                | 5 (20.8)   | 21 (23.6)  | 9 (17.6)  | 3 (42.9)    | 38 (22.2)  |                |                |
| <b>Mixture</b>                       | 1 (25.0)   | 5 (27.8)  | 11 (28.9) | 3 (37.5)  | 20 (29.4)   | 0.504          | 0 (0.0)    | 15 (16.9)  | 16 (31.4) | 1 (14.3)    | 32 (18.7)  | 0.018          | 0.060          |
| <b>Pain intensity<sup>§</sup></b>    | 9.5 (8-10) | 9 (8-10)  | 9 (8-10)  | 8.5 (8-9) | 9 (8-10)    | 0.784          | 9 (7.5-10) | 8 (7-10)   | 8 (6.5-9) | 7.5 (6.5-9) | 8 (7-10)   | 0.064          | <0.001         |
| <b>Symptom</b>                       | 5 (83.3)   | 20 (90.9) | 47 (88.7) | 17 (85.0) | 89 (88.1)   | 0.794          | 23 (62.2)  | 105 (72.9) | 61 (79.2) | 14 (70.0)   | 203 (73.0) | 0.283          | 0.002          |
| <b>Symptom clusters<sup>  </sup></b> |            |           |           |           |             |                |            |            |           |             |            |                |                |
| <b>Cluster 1</b>                     | 2 (33.3)   | 18 (81.8) | 27 (50.9) | 11 (55.0) | 58 (57.4)   |                | 26 (70.3)  | 102 (70.8) | 54 (70.1) | 16 (80.0)   | 198 (71.2) |                |                |
| <b>Cluster 2</b>                     | 3 (50.0)   | 2 (9.1)   | 16 (30.2) | 4 (20.0)  | 25 (24.8)   |                | 9 (24.3)   | 36 (25.0)  | 19 (24.7) | 3 (15.0)    | 67 (24.1)  |                |                |
| <b>Cluster 3</b>                     | 1 (16.7)   | 2 (9.1)   | 10 (18.9) | 5 (25.0)  | 18 (17.8)   | 0.132          | 2 (5.4)    | 6 (4.2)    | 4 (5.2)   | 1 (5.0)     | 13 (4.7)   | 0.967          | <0.001         |
| <b>Activity</b>                      |            |           |           |           |             |                |            |            |           |             |            |                |                |
| <b>Sleep</b>                         | 1 (16.7)   | 3 (14.3)  | 4 (7.8)   | 3 (15.8)  | 11 (11.3)   |                | 5 (13.5)   | 29 (20.1)  | 10 (13.0) | 4 (20.0)    | 48 (17.3)  |                |                |
| <b>Rest</b>                          | 3 (50.0)   | 9 (42.9)  | 22 (43.1) | 14 (73.7) | 48 (49.5)   |                | 19 (51.4)  | 65 (45.1)  | 43 (55.8) | 13 (65.0)   | 140 (50.4) |                |                |
| <b>Exertion</b>                      | 2 (33.3)   | 9 (42.9)  | 25 (49.0) | 2 (10.5)  | 38 (39.2)   | 0.069          | 13 (35.1)  | 50 (34.7)  | 24 (31.2) | 3 (15.0)    | 90 (32.4)  | 0.393          | 0.274          |
| <b>Stress trigger</b>                | 1 (16.7)   | 2 (9.1)   | 4 (7.5)   | 3 (15.8)  | 10 (10.0)   | 0.519          | 5 (13.5)   | 11 (7.7)   | 6 (7.9)   | 2 (10.0)    | 24 (8.7)   | 0.669          | 0.697          |

\*Values are number and percentage unless otherwise indicated. †Pain location: Typical - retrosternal, precordial, right thoracic, or bilateral thoracic; Atypical - epigastric, back, left arm or shoulder, right arm or shoulder, neck, or jaw; Mixture - typical and atypical location. ‡Radiation type: Typical - left arm or shoulder, right arm or shoulder, neck, or jaw; Atypical: retrosternal, precordial, right thoracic, bilateral thoracic, epigastric, or back regions; Mixture: typical and atypical irradiation. §Median (interquartile range). ||Symptom clusters: cluster 1 (no symptom cluster) - low endorsement probabilities for all items; cluster 2 (dyspnoea and sweating cluster) - high probability for dyspnoea at rest and sweating; cluster 3 (multiple symptoms cluster) - high probabilities for all items (dyspnoea at rest, exertional dyspnoea, sweating, nausea, vomiting, dizziness, blurry vision, presyncope, syncope, palpitation, weakness, other symptoms, other digestive symptoms and discomfort). ¶p for age differences within each sex; #p for differences between sexes.

Supplementary Table 2. Clinical presentation of patients with non-ST elevation acute coronary syndrome, by sex and age\*

|                           | Women        |            |           |           |            | P <sup>¶</sup> | Men        |            |            |           |            | P <sup>¶</sup> | P <sup>#</sup> |
|---------------------------|--------------|------------|-----------|-----------|------------|----------------|------------|------------|------------|-----------|------------|----------------|----------------|
|                           | <=45         | 46-64      | 65-79     | >=80      | Total      |                | <=45       | 46-64      | 65-79      | >=80      | Total      |                |                |
| <b>Total</b>              | 8 (6.3)      | 32 (25.4)  | 56 (44.4) | 30 (23.8) | 126 (100)  |                | 24 (6.5)   | 159 (43.2) | 143 (38.9) | 42 (11.4) | 368 (100)  |                |                |
| <b>Pain</b>               | 8 (100.0)    | 31 (96.9)  | 52 (92.9) | 28 (93.3) | 119 (94.4) | 0.864          | 24 (100.0) | 155 (97.5) | 141 (98.6) | 38 (90.5) | 358 (97.3) | 0.073          | 0.131          |
| <b>Pain location†</b>     |              |            |           |           |            |                |            |            |            |           |            |                |                |
| <b>Typical</b>            | 7 (87.5)     | 26 (83.9)  | 44 (86.3) | 23 (82.1) | 100 (84.7) |                | 22 (91.7)  | 126 (82.4) | 120 (85.1) | 31 (81.6) | 299 (84.0) |                |                |
| <b>Atypical</b>           | 0 (0.0)      | 5 (16.1)   | 3 (5.9)   | 1 (3.6)   | 9 (7.6)    |                | 2 (8.3)    | 16 (10.5)  | 16 (11.3)  | 5 (13.2)  | 39 (11.0)  |                |                |
| <b>Mixture</b>            | 1 (12.5)     | 0 (0.0)    | 4 (7.8)   | 4 (14.3)  | 9 (7.6)    | 0.172          | 0 (0.0)    | 11 (7.2)   | 5 (3.5)    | 2 (5.3)   | 18 (5.1)   | 0.778          | 0.367          |
| <b>Referred pain</b>      | 5 (62.5)     | 23 (74.2)  | 34 (65.4) | 17 (60.7) | 79 (66.4)  | 0.728          | 14 (58.3)  | 89 (57.4)  | 75 (53.2)  | 16 (42.1) | 194 (54.2) | 0.350          | 0.020          |
| <b>Radiation type‡</b>    |              |            |           |           |            |                |            |            |            |           |            |                |                |
| <b>Typical</b>            | 5 (100.0)    | 12 (52.2)  | 11 (32.4) | 6 (35.3)  | 34 (43.0)  |                | 9 (64.3)   | 61 (69.3)  | 41 (54.7)  | 7 (43.8)  | 118 (61.1) |                |                |
| <b>Atypical</b>           | 0 (0.0)      | 8 (34.8)   | 8 (23.5)  | 9 (52.9)  | 25 (31.6)  |                | 2 (14.3)   | 16 (18.2)  | 30 (40.0)  | 5 (31.3)  | 53 (27.5)  |                |                |
| <b>Mixture</b>            | 0 (0.0)      | 3 (13.0)   | 15 (44.1) | 2 (11.8)  | 20 (25.3)  | 0.008          | 3 (21.4)   | 11 (12.5)  | 4 (5.3)    | 4 (25.0)  | 22 (11.4)  | 0.007          | 0.005          |
| <b>Pain intensity§</b>    | 9.5 (8.5-10) | 9.5 (8-10) | 8 (8-10)  | 8 (7-9)   | 9 (8-10)   | 0.224          | 8 (6-9)    | 8 (6-9)    | 8 (6-9)    | 8 (7.5-9) | 8 (6-9)    | 0.200          | <0.001         |
| <b>Symptom</b>            | 6 (75.0)     | 25 (78.1)  | 44 (78.6) | 24 (80.0) | 99 (78.6)  | 0.992          | 20 (83.3)  | 104 (65.4) | 90 (62.9)  | 28 (66.7) | 242 (65.8) | 0.278          | 0.007          |
| <b>Symptom clusters  </b> |              |            |           |           |            |                |            |            |            |           |            |                |                |
| <b>Cluster 1</b>          | 5 (62.5)     | 23 (71.9)  | 35 (62.5) | 21 (70.0) | 84 (66.7)  |                | 17 (70.8)  | 130 (81.8) | 116 (81.1) | 36 (85.7) | 299 (81.3) |                |                |
| <b>Cluster 2</b>          | 2 (25.0)     | 6 (18.8)   | 12 (21.4) | 4 (13.3)  | 24 (19.1)  |                | 6 (25.0)   | 23 (14.5)  | 16 (11.2)  | 6 (14.3)  | 51 (13.9)  |                |                |
| <b>Cluster 3</b>          | 1 (12.5)     | 3 (9.4)    | 9 (16.1)  | 5 (16.7)  | 18 (14.3)  | 0.919          | 1 (4.2)    | 6 (3.8)    | 11 (7.7)   | 0 (0.0)   | 18 (4.9)   | 0.231          | <0.001         |
| <b>Activity</b>           |              |            |           |           |            |                |            |            |            |           |            |                |                |
| <b>Sleep</b>              | 1 (14.3)     | 13 (44.8)  | 7 (12.7)  | 4 (14.3)  | 25 (21.0)  |                | 1 (4.2)    | 36 (23.1)  | 25 (17.7)  | 9 (22.0)  | 71 (19.6)  |                |                |
| <b>Rest</b>               | 2 (28.6)     | 9 (31.0)   | 28 (50.9) | 15 (53.6) | 54 (45.4)  |                | 15 (62.5)  | 59 (37.8)  | 62 (44.0)  | 20 (48.8) | 156 (43.1) |                |                |
| <b>Exertion</b>           | 4 (57.1)     | 7 (24.1)   | 20 (36.4) | 9 (32.1)  | 40 (33.6)  | 0.032          | 8 (33.3)   | 61 (39.1)  | 54 (38.3)  | 12 (29.3) | 135 (37.3) | 0.180          | 0.768          |
| <b>Stress trigger</b>     | 1 (12.5)     | 4 (12.5)   | 7 (12.7)  | 0 (0.0)   | 12 (9.6)   | 0.140          | 6 (25.0)   | 12 (7.7)   | 9 (6.4)    | 4 (9.8)   | 31 (8.6)   | 0.044          | 0.731          |

\*Values are number and percentage unless otherwise indicated. †Pain location: Typical - retrosternal, precordial, right thoracic, or bilateral thoracic; Atypical - epigastric, back, left arm or shoulder, right arm or shoulder, neck, or jaw; Mixture - typical and atypical location. ‡Radiation type: Typical - left arm or shoulder, right arm or shoulder, neck, or jaw; Atypical: retrosternal, precordial, right thoracic, bilateral thoracic, epigastric, or back regions; Mixture: typical and atypical irradiation. §Median (interquartile range). ||Symptom clusters: cluster 1 (no symptom cluster) - low endorsement probabilities for all items; cluster 2 (dyspnoea and sweating cluster) - high probability for dyspnoea at rest and sweating; cluster 3 (multiple symptoms cluster) - high probabilities for all items (dyspnoea at rest, exertional dyspnoea, sweating, nausea, vomiting, dizziness, blurry vision, presyncope, syncope, palpitation, weakness, other symptoms, other digestive symptoms and discomfort). ¶p for age differences within each sex; #p for differences between sexes.

Supplementary Table 3. Marginal percentage of subjects with each symptom in each assigned cluster\*

|                                 | Symptom clusters                |                                 |                                |
|---------------------------------|---------------------------------|---------------------------------|--------------------------------|
|                                 | Cluster 1 <sup>*</sup><br>n=639 | Cluster 2 <sup>†</sup><br>n=167 | Cluster 3 <sup>‡</sup><br>n=67 |
| <b>Dyspnoea at rest</b>         | 17.4                            | 34.2                            | 37.3                           |
| <b>Exertional dyspnoea</b>      | 6.0                             | 2.1                             | 14.5                           |
| <b>Sweating</b>                 | 22.2                            | 89.6                            | 71.7                           |
| <b>Nausea and vomiting</b>      | 6.5                             | 9.7                             | 41.4                           |
| <b>Dizziness</b>                | 2.6                             | 18.0                            | 74.1                           |
| <b>Blurry vision</b>            | 0.6                             | 4.4                             | 27.5                           |
| <b>Presyncope</b>               | 1.3                             | 11.4                            | 42.7                           |
| <b>Syncope</b>                  | 1.6                             | 3.6                             | 10.5                           |
| <b>Palpitations</b>             | 0.3                             | 5.4                             | 19.5                           |
| <b>Weakness</b>                 | 7.5                             | 17.8                            | 64.4                           |
| <b>“Other symptoms”</b>         | 4.5                             | 5.5                             | 12.8                           |
| <b>Other digestive symptoms</b> | 1.0                             | 1.0                             | 1.4                            |
| <b>Discomfort</b>               | 1.3                             | 1.1                             | 4.2                            |

\*Values are percentages.

† Cluster 1: no symptom cluster; † Cluster 2: dyspnoea and sweating cluster; ‡ Cluster 3: multiple symptoms cluster.

**Supplementary Table 4.** Differences between women and men in clinical presentation of acute coronary syndrome, by age group (< 55 vs ≥55 years old) (men are the reference class).

| Symptoms                                                 | <55 years |            | ≥55 years |             | Interaction p-value | Adjusted for                                                                               |
|----------------------------------------------------------|-----------|------------|-----------|-------------|---------------------|--------------------------------------------------------------------------------------------|
|                                                          | OR        | 95% CI     | OR        | 95% CI      |                     |                                                                                            |
| <b>Pain</b>                                              | --*       | --*        | 0.46      | 0.18-1.18   | 0.777               | Age, type of ACS, marital status, dyslipidaemia, CABG                                      |
| <b>Typical (chest) pain</b><br>(vs atypical or mixture)† | 0.65      | 0.23-1.86  | 1.55      | 0.88-2.71   | 0.973               | Age, type of ACS, coronary anatomy, region, smoking, dyslipidaemia, previous heart failure |
| <b>Referred pain</b>                                     | 3.81      | 1.41-10.3  | 1.73      | 1.14-2.61   | 0.528               | Age, type of ACS, coronary anatomy, region, income, social class, previous renal failure.  |
| <b>Radiation type‡</b>                                   |           |            |           |             |                     |                                                                                            |
| <b>Typical</b>                                           | 1         | Reference  | 1         | Reference   |                     | Age, type of ACS, employment status, region                                                |
| <b>Atypical</b>                                          | 1.19      | 0.41-3.45  | 1.34      | 0.77-2.35   | 0.415               |                                                                                            |
| <b>Mixture</b>                                           | 1.43      | 0.40-5.16  | 2.56      | 1.39-4.71   | 0.606               |                                                                                            |
| <b>Pain intensity</b><br>(higher than 8/10)              | 5.23      | 2.17-12.60 | 2.09      | 1.35-3.24   | 0.028               | Age, type of ACS, coronary anatomy, education, professional group, previous AMI            |
| <b>Symptoms</b>                                          | 1.88      | 0.76-4.66  | 1.91      | 1.21-3.04   | 0.799               | Age, type of ACS, region, previous AMI, previous heart failure                             |
| <b>Symptom clusters§</b>                                 |           |            |           |             |                     |                                                                                            |
| <b>Cluster 1</b>                                         | 1         | Reference  | 1         | Reference   |                     | Age, type of ACS, professional group, region, previous AMI                                 |
| <b>Cluster 2</b>                                         | 0.88      | 0.31-2.50  | 1.49      | 0.93-2.38   | 0.246               |                                                                                            |
| <b>Cluster 3</b>                                         | 3.30      | 0.99-10.97 | 4.08      | 2.07-8.05   | 0.501               |                                                                                            |
| <b>Activity group</b>                                    |           |            |           |             |                     |                                                                                            |
| <b>Sleeping</b>                                          | 1         | Reference  | 1         | (Reference) |                     | Age, type of ACS, previous heart failure                                                   |
| <b>Rest</b>                                              | 0.74      | 0.25-2.19  | 1.08      | 0.64-1.81   | 0.284               |                                                                                            |
| <b>Exertion</b>                                          | 0.89      | 0.29-2.67  | 1.27      | 0.74-2.16   | 0.408               |                                                                                            |

ACS, acute coronary syndrome; AMI, acute myocardial infarction; CABG: coronary artery bypass surgery; CI, confidence interval; OR, odds ratio.

\*All women below 55 years old presented with pain.

†Pain location: Typical - retrosternal, precordial, right thoracic, or bilateral thoracic; Atypical - epigastric, back, left arm or shoulder, right arm or shoulder, neck, or jaw; Mixture - typical and atypical location.

‡Radiation type: Typical - left arm or shoulder, right arm or shoulder, neck, or jaw; Atypical: retrosternal, precordial, right thoracic, bilateral thoracic, epigastric, or back regions; Mixture: typical and atypical irradiation.

§Symptom clusters: cluster 1 (no symptom cluster) - low endorsement probabilities for all items; cluster 2 (dyspnoea and sweating cluster) - high probability for dyspnoea at rest and sweating; cluster 3 (multiple symptoms cluster) - high probabilities for all items (dyspnoea at rest, exertional dyspnoea, sweating, nausea, vomiting, dizziness, blurry vision, presyncope, syncope, palpitation, weakness, other symptoms, other digestive symptoms and discomfort).



STROBE Statement—checklist of items : *Sex differences in presenting symptoms of acute coronary syndrome: the EPIHeart cohort study*

|                              | Item No | Recommendation                                                                                                                                                                                                                                                                                                                                                                                                                                                                                                                                                                                                                                                                                                                                                                                                                                                   |
|------------------------------|---------|------------------------------------------------------------------------------------------------------------------------------------------------------------------------------------------------------------------------------------------------------------------------------------------------------------------------------------------------------------------------------------------------------------------------------------------------------------------------------------------------------------------------------------------------------------------------------------------------------------------------------------------------------------------------------------------------------------------------------------------------------------------------------------------------------------------------------------------------------------------|
| <b>Title and abstract</b>    | 1       | (a) Indicate the study's design with a commonly used term in the title or the abstract – <b>page 1 (title) and page 2 (abstract)</b><br>(b) Provide in the abstract an informative and balanced summary of what was done and what was found – <b>page 2</b>                                                                                                                                                                                                                                                                                                                                                                                                                                                                                                                                                                                                      |
| <b>Introduction</b>          |         |                                                                                                                                                                                                                                                                                                                                                                                                                                                                                                                                                                                                                                                                                                                                                                                                                                                                  |
| Background/rationale         | 2       | Explain the scientific background and rationale for the investigation being reported – <b>page 4</b>                                                                                                                                                                                                                                                                                                                                                                                                                                                                                                                                                                                                                                                                                                                                                             |
| Objectives                   | 3       | State specific objectives, including any prespecified hypotheses - <b>page 4</b>                                                                                                                                                                                                                                                                                                                                                                                                                                                                                                                                                                                                                                                                                                                                                                                 |
| <b>Methods</b>               |         |                                                                                                                                                                                                                                                                                                                                                                                                                                                                                                                                                                                                                                                                                                                                                                                                                                                                  |
| Study design                 | 4       | Present key elements of study design early in the paper – <b>pages 4 and 5</b>                                                                                                                                                                                                                                                                                                                                                                                                                                                                                                                                                                                                                                                                                                                                                                                   |
| Setting                      | 5       | Describe the setting, locations, and relevant dates, including periods of recruitment, exposure, follow-up, and data collection – <b>pages 4-6</b>                                                                                                                                                                                                                                                                                                                                                                                                                                                                                                                                                                                                                                                                                                               |
| Participants                 | 6       | <i>Cohort study</i> : Give the eligibility criteria, and the sources and methods of selection of participants – <b>pages 4 and 5</b>                                                                                                                                                                                                                                                                                                                                                                                                                                                                                                                                                                                                                                                                                                                             |
| Variables                    | 7       | Clearly define all outcomes, exposures, predictors, potential confounders, and effect modifiers. Give diagnostic criteria, if applicable – <b>pages 6 and 7</b>                                                                                                                                                                                                                                                                                                                                                                                                                                                                                                                                                                                                                                                                                                  |
| Data sources/<br>measurement | 8       | For each variable of interest, give sources of data and details of methods of assessment (measurement). Describe comparability of assessment methods if there is more than one group – <b>pages 5, 6 and 7</b>                                                                                                                                                                                                                                                                                                                                                                                                                                                                                                                                                                                                                                                   |
| Bias                         | 9       | Describe any efforts to address potential sources of bias - <b>page 7</b>                                                                                                                                                                                                                                                                                                                                                                                                                                                                                                                                                                                                                                                                                                                                                                                        |
| Study size                   | 10      | Explain how the study size was arrived at – <b>page 5 and figure 1</b>                                                                                                                                                                                                                                                                                                                                                                                                                                                                                                                                                                                                                                                                                                                                                                                           |
| Quantitative variables       | 11      | Explain how quantitative variables were handled in the analyses. If applicable, describe which groupings were chosen and why – <b>page 6 and 7</b>                                                                                                                                                                                                                                                                                                                                                                                                                                                                                                                                                                                                                                                                                                               |
| Statistical methods          | 12      | (a) Describe all statistical methods, including those used to control for confounding - <b>page 7</b><br>(b) Describe any methods used to examine subgroups and interactions – <b>page 7</b><br>(c) Explain how missing data were addressed – <b>Patients who were unable to answer the questionnaire (with missing data on clinical presentation) were not included.</b><br>(d) <i>Cohort study</i> —If applicable, explain how loss to follow-up was addressed – <b>Data were collected within a cohort study, but clinical presentation was collected through a questionnaire.</b><br>(e) Describe any sensitivity analyses – <b>We analysed clinical presentation separately by type of acute coronary syndrome (Supplementary tables 1 and 2), but as results were similar by sex and age both types of acute coronary syndrome were analysed together.</b> |

Continued on next page

|                          |    |                                                                                                                                                                                                                                                                                                                                                           |
|--------------------------|----|-----------------------------------------------------------------------------------------------------------------------------------------------------------------------------------------------------------------------------------------------------------------------------------------------------------------------------------------------------------|
| <b>Results</b>           |    |                                                                                                                                                                                                                                                                                                                                                           |
| Participants             | 13 | (a) Report numbers of individuals at each stage of study—eg numbers potentially eligible, examined for eligibility, confirmed eligible, included in the study, completing follow-up, and analysed – <b>pages 4 and 5</b><br>(b) Give reasons for non-participation at each stage – <b>page 5</b><br>(c) Consider use of a flow diagram – <b>Figure 1.</b> |
| Descriptive data         | 14 | (a) Give characteristics of study participants (eg demographic, clinical, social) and information on exposures and potential confounders – <b>pages 8-9</b><br>(b) Indicate number of participants with missing data for each variable of interest – <b>page 9</b>                                                                                        |
| Outcome data             | 15 | <i>Cohort study</i> —Report numbers of outcome events or summary measures over time – <b>pages 10-12</b>                                                                                                                                                                                                                                                  |
| Main results             | 16 | (a) Give unadjusted estimates and, if applicable, confounder-adjusted estimates and their precision (eg, 95% confidence interval). Make clear which confounders were adjusted for and why they were included – <b>pages 13-16</b><br>(b) Report category boundaries when continuous variables were categorized – <b>pages 10-14</b>                       |
| Other analyses           | 17 | Report other analyses done—<br>eg analyses of subgroups and interactions, and sensitivity analyses – <b>page 10</b>                                                                                                                                                                                                                                       |
| <b>Discussion</b>        |    |                                                                                                                                                                                                                                                                                                                                                           |
| Key results              | 18 | Summarise key results with reference to study objectives – <b>page 17</b>                                                                                                                                                                                                                                                                                 |
| Limitations              | 19 | Discuss limitations of the study, taking into account sources of potential bias or imprecision. Discuss both direction and magnitude of any potential bias – <b>pages 19 and 20</b>                                                                                                                                                                       |
| Interpretation           | 20 | Give a cautious overall interpretation of results considering objectives, limitations, multiplicity of analyses, results from similar studies, and other relevant evidence - <b>pages 17-19</b>                                                                                                                                                           |
| Generalisability         | 21 | Discuss the generalisability (external validity) of the study results – <b>page 19</b>                                                                                                                                                                                                                                                                    |
| <b>Other information</b> |    |                                                                                                                                                                                                                                                                                                                                                           |
| Funding                  | 22 | Give the source of funding and the role of the funders for the present study and, if applicable, for the original study on which the present article is based – <b>page 22</b>                                                                                                                                                                            |

# BMJ Open

## Sex differences in presenting symptoms of acute coronary syndrome: the EPIHeart cohort study

|                                 |                                                                                                                                                                                                                                                                                                                                                                                                                                                                                                                                                                                                                                                                                                                                                                                                                                                                                                                                                                                                                                                                                                       |
|---------------------------------|-------------------------------------------------------------------------------------------------------------------------------------------------------------------------------------------------------------------------------------------------------------------------------------------------------------------------------------------------------------------------------------------------------------------------------------------------------------------------------------------------------------------------------------------------------------------------------------------------------------------------------------------------------------------------------------------------------------------------------------------------------------------------------------------------------------------------------------------------------------------------------------------------------------------------------------------------------------------------------------------------------------------------------------------------------------------------------------------------------|
| Journal:                        | <i>BMJ Open</i>                                                                                                                                                                                                                                                                                                                                                                                                                                                                                                                                                                                                                                                                                                                                                                                                                                                                                                                                                                                                                                                                                       |
| Manuscript ID                   | bmjopen-2017-018798.R3                                                                                                                                                                                                                                                                                                                                                                                                                                                                                                                                                                                                                                                                                                                                                                                                                                                                                                                                                                                                                                                                                |
| Article Type:                   | Research                                                                                                                                                                                                                                                                                                                                                                                                                                                                                                                                                                                                                                                                                                                                                                                                                                                                                                                                                                                                                                                                                              |
| Date Submitted by the Author:   | 22-Dec-2017                                                                                                                                                                                                                                                                                                                                                                                                                                                                                                                                                                                                                                                                                                                                                                                                                                                                                                                                                                                                                                                                                           |
| Complete List of Authors:       | Araújo, Carla; Universidade do Porto, EPIUnit-Instituto de Saúde Pública; Centro Hospitalar de Trás-os-Montes e Alto Douro, EPE, Cardiologia<br>Laszczyńska, Olga; Universidade do Porto, EPIUnit-Instituto de Saúde Pública<br>Viana, Marta; Universidade do Porto, EPIUnit-Instituto de Saúde Pública<br>Melão, Filipa; Centro Hospitalar São João, EPE, Cardiologia<br>Henriques, Ana; Universidade do Porto, EPIUnit-Instituto de Saúde Pública<br>Borges, Andreia; Universidade do Porto, EPIUnit-Instituto de Saúde Pública<br>Severo, Milton; Universidade do Porto, EPIUnit-Instituto de Saúde Pública; Faculdade de Medicina da Universidade do Porto, Departamento de Ciências da Saúde Pública e Forenses e Educação Médica<br>Maciel, Maria Júlia; Centro Hospitalar São João, EPE, Cardiologia<br>Moreira, Ilídio; Centro Hospitalar de Trás-os-Montes e Alto Douro, EPE, Cardiologia<br>Azevedo, Ana; Universidade do Porto, EPIUnit-Instituto de Saúde Pública; Faculdade de Medicina da Universidade do Porto, Departamento de Ciências da Saúde Pública e Forenses e Educação Médica |
| <b>Primary Subject Heading</b>: | Cardiovascular medicine                                                                                                                                                                                                                                                                                                                                                                                                                                                                                                                                                                                                                                                                                                                                                                                                                                                                                                                                                                                                                                                                               |
| Secondary Subject Heading:      | Diagnostics                                                                                                                                                                                                                                                                                                                                                                                                                                                                                                                                                                                                                                                                                                                                                                                                                                                                                                                                                                                                                                                                                           |
| Keywords:                       | Sex, Acute coronary syndrome, Women, Diagnosis                                                                                                                                                                                                                                                                                                                                                                                                                                                                                                                                                                                                                                                                                                                                                                                                                                                                                                                                                                                                                                                        |
|                                 |                                                                                                                                                                                                                                                                                                                                                                                                                                                                                                                                                                                                                                                                                                                                                                                                                                                                                                                                                                                                                                                                                                       |

SCHOLARONE™  
Manuscripts

1  
2  
3 **Sex differences in presenting symptoms of acute coronary syndrome: the EPIHeart cohort study**  
4  
5

6 Carla Araújo,<sup>1,2</sup> Olga Laszczyńska,<sup>1</sup> Marta Viana,<sup>1</sup> Filipa Melão,<sup>3</sup> Ana Henriques,<sup>1</sup> Andreia Borges,<sup>1</sup>  
7  
8 Milton Severo,<sup>1,4</sup> Maria Júlia Maciel,<sup>3</sup> Ilídio Moreira,<sup>2</sup> Ana Azevedo<sup>1,4</sup>  
9

10  
11 <sup>1</sup>EPIUnit - Instituto de Saúde Pública, Universidade do Porto, Portugal;

12  
13 <sup>2</sup>Serviço de Cardiologia, Centro Hospitalar de Trás-os-Montes e Alto Douro, EPE, Hospital de São Pedro,  
14  
15 Vila Real, Portugal;

16  
17 <sup>3</sup>Serviço de Cardiologia, Centro Hospitalar São João, EPE, Porto, Portugal;

18  
19 <sup>4</sup>Departamento de Ciências da Saúde Pública e Forenses e Educação Médica, Faculdade de Medicina da  
20  
21 Universidade do Porto, Portugal.  
22

23  
24  
25 **Correspondence:**

26 Carla Araújo

27 Instituto de Saúde Pública da Universidade do Porto

28 Rua das Taipas nº135

29 4050-600 Porto

30 Telephone: +351 222061820 Fax: +351 222061821 Email: [carla-r-araujo@hotmail.com](mailto:carla-r-araujo@hotmail.com)  
31  
32  
33  
34  
35  
36  
37  
38  
39  
40  
41  
42  
43  
44  
45  
46  
47  
48  
49  
50  
51  
52  
53  
54  
55  
56  
57  
58  
59  
60

## ABSTRACT

**Objectives:** Prompt diagnosis of acute coronary syndrome (ACS) remains a challenge, with presenting symptoms affecting the diagnosis algorithm and, consequently, management and outcomes. This study aimed to identify sex differences in presenting symptoms of ACS.

**Design:** Data were collected within a prospective cohort study (EPIHeart).

**Setting:** Patients with confirmed diagnosis of type 1 (primary spontaneous) ACS who were consecutively admitted to the Cardiology Department of two tertiary hospitals in Portugal between August 2013 and December 2014.

**Participants:** Presenting symptoms of 873 patients (227 women) were obtained through a face-to-face interview.

**Outcome measures:** Typical pain was defined according to the definition of cardiology societies. Clusters of symptoms other than pain were identified by latent class analysis. Logistic regression was used to quantify differences in presentation of ACS symptoms by sex.

**Results:** Chest pain was reported by 82% of patients, with no differences in frequency or location between sexes. Women were more likely to feel pain with an intensity higher than 8/10 and this association was stronger for patients under 65 years old (interaction  $p=0.028$ ). Referred pain was also more likely in women, particularly pain referred to typical and atypical locations simultaneously. The multiple symptoms cluster, which was characterized by a high probability of presenting with all symptoms, was almost 4-fold more prevalent in women (3.92, 2.21–6.98). Presentation with this cluster was associated with a higher 30-day mortality rate adjusted for the GRACE 2.0 risk score (4.9% vs 0.9% for the two other clusters,  $p<0.001$ ).

**Conclusions:** While there are no significant differences in the frequency or location of pain between sexes, women are more likely to feel pain of higher intensity and to present with referred pain and symptoms other than pain. Knowledge of these ACS presentation profiles is important for health policy decisions and clinical practice.

Keywords: Sex; acute coronary syndrome; women; diagnosis.

**Strengths and limitations**

Within a prospective cohort study, presenting symptoms of acute coronary syndrome were obtained through a structured questionnaire applied within the first 48 hours after admission.

Consecutive sampling, the detailed clinical information obtained through the questionnaire and adjustment for several confounding variables strengthens our results.

The results of this study are valid for stable patients admitted to the hospital and who were able to answer the questionnaire in the acute phase of the acute coronary syndrome.

Some of the sex differences in presenting symptoms may be influenced by selection bias because of a higher risk of non-inclusion of women due to misdiagnosis or death in the early hours of admission.

## INTRODUCTION

Acute coronary syndrome (ACS) is still one of the main causes of death worldwide and in Europe.<sup>1,2</sup> Coronary heart disease mortality has decreased in the last decades in developed countries because of primary prevention and improvement in treatment of patients with ACS.<sup>2</sup> Attainment of the maximal benefit of treatment of these patients is threatened by delayed diagnosis, partly dependent on clinical suspicion of ACS. The subjective experience of symptoms influences patients' attitudes in seeking help and professionals' interpretation of clinical presentations.<sup>3</sup> Early recognition of ACS may be challenging because while patients with presumed ACS have contact with healthcare providers,<sup>4</sup> many patients do not have an electrocardiogram before hospitalization.<sup>5</sup> Therefore, physicians frequently have to make decisions that are only clinically based.

The population of patients with atypical ACS presentation is still not well characterized.<sup>6</sup> Women and men generally have the same type of symptoms during an ACS episode, although the proportion presenting with different combinations of symptoms varies.<sup>7</sup> This conflicting evidence can be partly explained by the diverse methodology used, with few prospective studies, usually without a specific questionnaire. In prospective studies, small convenience samples were used and confounding was not always adequately addressed.<sup>8,9</sup> Therefore, sex-specific research on ACS presentation is a challenge and priority.<sup>10</sup>

This study aimed to analyse sex differences in presenting symptoms of ACS within a prospective cohort study, taking into account the contribution of age, socioeconomic data, previous history of coronary heart disease, risk factors, comorbidities, type of ACS and coronary anatomy to the presenting symptoms.

## METHODS

### Study Design and Sample Selection

The EPIHeart cohort study was designed to identify inequalities in management and outcomes of patients with ACS. This study included all consecutive patients who were admitted between August 2013 and December 2014 to the Cardiology Department of two tertiary hospitals in two regions in northern Portugal (Hospital de São João, Porto, covering the metropolitan area of Porto in the coast; and Hospital de São Pedro, Vila Real, covering the interior, northeastern region). Eligible patients were 18 years old or older who lived in the catchment area of these hospitals (districts: Porto, Vila Real, Bragança, and Viseu),

1  
2  
3 with confirmed diagnosis of type 1 (primary spontaneous) ACS. The diagnosis of type 1 ACS and the  
4 classification in different subtypes was determined by the treating cardiologist, based on symptoms and  
5 signs at presentation, electrocardiogram findings and the increase in cardiac enzyme levels (high-  
6 sensitivity troponin I or T were used), according to the third universal definition of myocardial  
7 infarction.<sup>11</sup> The patients were also expected to be hospitalized for at least 48 hours and not  
8 institutionalized before the event. Of 1297 patients initially considered, in 164 the diagnosis of type 1  
9 ACS was not confirmed, 60 were excluded due to discharge or transfer before the interview, 18 died  
10 before being invited, and 44 were unable to answer the questionnaire because of clinical instability, no  
11 understanding of Portuguese, hearing problems, or cognitive impairment. Seventy-two patients refused to  
12 participate. For this analysis, we excluded 61 patients who were not admitted because of a symptom  
13 (patients referred by a doctor, after a scheduled appointment or diagnostic exam), four with vasospastic  
14 angina, and one illicit drug user. A total of 873 patients were included (Figure 1). The study protocol was  
15 in compliance with the principles of the Declaration of Helsinki and was approved by the Ethics  
16 Committee of both hospitals (*Comissão de Ética para a Saúde do Centro Hospitalar de S. João* and  
17 *Comissão de Ética do Centro Hospitalar de Trás-os-Montes e Alto Douro*, reference numbers of the  
18 approvals: 82/13 and 1286, respectively). All patients gave written informed consent.

### 33 **Procedures and data collection**

34 Presenting symptoms were obtained face-to-face using a structured questionnaire applied by trained  
35 interviewers, within the first 48 hours after admission, whenever possible. Over the following days, a  
36 second interview was conducted to collect data on sociodemographic characteristics and risk factors.  
37 Medical records were reviewed to extract data regarding previous medical history, admission information,  
38 and clinical data during hospitalization.

39 Pain, referred pain, and symptoms other than pain were measured dichotomously (yes/no). For the  
40 location of pain (direct and referred) patients were asked to point out where pain was occurring. To  
41 measure the intensity of pain, a 10-point scale (0, no pain; 10, pain of maximal intensity) was used.  
42 Symptoms other than pain included dyspnoea at rest, exertional dyspnoea, sweating, nausea, vomiting,  
43 dizziness, blurry vision, presyncope, syncope, palpitation, weakness, and an open-ended question of  
44 “other” (12 items). Answers to the last item enabled identification of two other relatively frequent  
45 symptoms, other digestive symptoms and discomfort. Activity at the onset of the episode was measured



1  
2  
3 dichotomously, including sleeping, rest, and any exertion. A stress trigger was assigned if the patient  
4 answered “yes” for at least one of following events within 24 hours preceding the episode: accident,  
5 recent diagnosis of disease, financial problems, and news of death/disease of a relative/friend.  
6

7  
8 Marital status was considered partnered for married patients or living in civil union. Education was  
9 recorded as completed years of schooling and classified into four categories: less than 4 (little formal  
10 education), 4 (elementary school), less than 12 (high school), and 12 or more years (secondary education  
11 or more). Occupations were classified into major professional groups, according to the Portuguese  
12 Classification of Occupations 2010,<sup>12</sup> integrated in the International Standard Classification of  
13 Occupations (ISCO/2008).  
14  
15  
16  
17  
18

### 19 20 21 **Definition of Variables**

22 Although symptoms of ACS have been widely described, their value for diagnosis of ACS is not  
23 unanimously recognized.<sup>13-15</sup> After discussion with clinical cardiologists of our team, we opted to use  
24 Cardiology Societies’ position papers to define direct and referred pain locations and to select symptoms  
25 to evaluate.<sup>16, 17</sup> Direct pain location was classified as follows: 1) typical for retrosternal, precordial, right  
26 thoracic, or bilateral thoracic pain (chest pain); 2) atypical for epigastric pain or located in the back, left  
27 arm or shoulder, right arm or shoulder, neck, or jaw; and 3) a mixture when both typical and atypical  
28 locations were present. Referred pain location was considered as follows: 1) typical if pain referred to the  
29 left arm or shoulder, right arm or shoulder, neck, or jaw; 2) atypical if pain referred to retrosternal,  
30 precordial, right thoracic, bilateral thoracic, epigastric, or back regions; and 3) a mixture for referred pain  
31 in typical and atypical locations.  
32  
33  
34  
35  
36  
37  
38  
39

40 Patients rarely present with a single symptom during an episode of ACS, and present with multiple  
41 symptoms instead that do not occur in isolation and may cluster.<sup>18</sup> There has been increasing interest in  
42 symptom cluster analysis in cardiovascular disease because it aids in assessment by enhancing  
43 recognition of patients with similar symptom profiles.<sup>19</sup> Groups of symptoms other than pain were  
44 obtained by latent class analysis.  
45  
46  
47  
48

49 The small group of non-classified (NC) patients with ACS (patients with left bundle branch block) was  
50 grouped with patients with ST elevation myocardial infarction (STEMI) (STEMI/NC ACS group). Non-  
51 ST elevation ACS (NSTEMI) included unstable angina and non-ST elevation acute myocardial  
52 infarction or subacute myocardial infarction.  
53  
54  
55  
56  
57  
58  
59  
60

1  
2  
3 Considering the possible association between coronary anatomy and clinical presentation, we grouped  
4 patients according to coronary angiography into five groups: managed conservatively; non-obstructive  
5 coronary artery disease; lesions exclusively in the anterior descending artery; lesions in the right and/or  
6 circumflex artery; and lesions in the left main coronary artery, three-vessel disease or disease both in the  
7 anterior descending artery and the right or circumflex artery.  
8  
9  
10

### 11 12 13 **Data Analysis**

14  
15 Continuous variables are expressed as mean and standard deviation or as median and interquartile range  
16 (IQR). Categorical variables are shown as number and percentage. To compare differences between  
17 women and men, and by age-groups, the chi-square or Fisher's test was used for categorical variables and  
18 the t-test, Mann-Whitney or Kruskal-Wallis tests for continuous variables. Latent class analysis was used  
19 to identify distinct groups of individuals from a sample (clusters) who were homogeneous within the  
20 group. This was based on the fact that performance of an individual in a set of items is explained by a  
21 categorical latent variable with K classes (clusters), commonly called latent classes. The number of latent  
22 clusters was defined according to the Akaike information criterion (AIC). Starting from one single cluster  
23 and increasing one cluster at each step, the best solution was identified when an increase in the number of  
24 clusters did not lead to a decrease in the AIC.  
25  
26  
27  
28  
29  
30  
31  
32

33 Patient and system delays, severity indicators, risk stratification using calculated GRACE and CRUSADE  
34 risk scores, left ventricular systolic dysfunction and 30-day mortality rate adjusted for the GRACE 2.0  
35 risk score,<sup>20</sup> were assessed according to presence of typical (chest) pain and cluster of symptoms other  
36 pain. The 30-day mortality adjusted for the GRACE 2.0 risk score was estimated based on predicted  
37 probabilities derived from logistic regression. Logistic regression was used to identify variables  
38 associated with clinical presentation. Variables with  $p < 0.15$  for a crude association with the endpoint  
39 were entered in the initial model and a backward strategy was used to exclude the least significant  
40 variables, based on Wald tests. We were then able to obtain the most parsimonious model with all the  
41 important determinants. Previous data support significant interaction between age and sex with clinical  
42 presentation, attenuated with advancing age, mainly in those 65 years old or older.<sup>3</sup> We assessed for effect  
43 measure modification by stratifying adjusted analyses based on two age groups (under 65 and 65 years old  
44 or older). Considering the relevance of analysing sex differences in ACS clinical presentation in younger  
45  
46  
47  
48  
49  
50  
51  
52  
53  
54  
55  
56  
57  
58  
59  
60

1  
2 patients, we also performed the age stratified multivariate models using 55 years old as cut-off. Sex, age  
3 (continuous), and type of ACS were forced to remain in the models.  
4

5  
6 All analyses were performed using STATA version 11.1 for Windows (Stata Corp LP, College Station,  
7 TX) and R version 2.12.1 (R Foundation for Statistical Computing, Vienna, Austria).  
8  
9

## 10 11 12 13 **RESULTS**

### 14 15 16 **Baseline characteristics**

17  
18 Women (n=227, 26.0%) were older (69.1 vs 62.2 years,  $p<0.001$ ) and more frequently lived in the interior  
19 region (52.4% vs 38.7%,  $p<0.001$ ) than men. Women were more often treated conservatively and had  
20 non-obstructive coronary artery disease more frequently than men. In this sample, no difference by sex  
21 was observed in the type of ACS, where 56.6% of the patients had a discharge diagnosis of NSTEMI  
22 (Table 1).  
23  
24  
25  
26

27 Women more frequently had hypertension (81.5% vs 62.7%,  $p<0.001$ ) and diabetes (38.8% vs 29.9%,  
28  $p=0.014$ ), and were more frequently obese (25.5% vs 18.5%,  $p=0.020$ ) and never smokers compared with  
29 men ( $p<0.001$ , Table 1). Men were submitted to percutaneous coronary intervention more often than  
30 women. There were no significant differences in a previous history of renal failure, prior myocardial  
31 infarction, prior coronary artery bypass surgery, prior heart failure, and dementia by sex (Table 1).  
32  
33  
34  
35

36 Women were more likely to be unpartnered, disabled, less educated, and had a lower income compared  
37 with men. The median time that elapsed between admission and application of the symptom questionnaire  
38 was slightly longer in women than in men (Table 1).  
39  
40  
41  
42  
43  
44  
45  
46  
47  
48  
49  
50  
51  
52  
53  
54  
55  
56  
57  
58  
59  
60

**Table 1. Baseline demographic, socioeconomic and clinical characteristics in the whole sample and by sex\***

|                                           | <b>Total<br/>(n = 873)</b> | <b>Women<br/>(n = 227)</b> | <b>Men<br/>(n = 646)</b> | <b>p</b> |
|-------------------------------------------|----------------------------|----------------------------|--------------------------|----------|
| <b>Age</b> (years), mean (SD)             | 64.0 (13.0)                | 69.1 (12.7)                | 62.2 (12.7)              | <0.001   |
| <b>Socioeconomic</b>                      |                            |                            |                          |          |
| Marital status                            |                            |                            |                          |          |
| Partnered                                 | 667 (76.8)                 | 133 (58.9)                 | 534 (83.2)               | <0.001   |
| Education                                 |                            |                            |                          |          |
| Little formal education                   | 172 (19.9)                 | 95 (42.4)                  | 77 (12.0)                |          |
| Elementary school                         | 337 (39.1)                 | 73 (32.6)                  | 264 (41.3)               |          |
| High school                               | 213 (24.7)                 | 32 (14.3)                  | 181 (28.3)               |          |
| Secondary education or more               | 141 (16.3)                 | 24 (10.7)                  | 117 (18.3)               | <0.001   |
| Employment status                         |                            |                            |                          |          |
| Employed/looking after home               | 282 (32.6)                 | 64 (28.3)                  | 218 (34.1)               |          |
| Unemployed                                | 107 (12.4)                 | 16 (7.1)                   | 91 (14.2)                |          |
| Retired                                   | 334 (38.6)                 | 93 (41.2)                  | 241 (37.7)               |          |
| Disabled                                  | 143 (16.5)                 | 53 (23.5)                  | 90 (14.1)                | <0.001   |
| Subjective social class                   |                            |                            |                          |          |
| Low                                       | 281 (32.2)                 | 81 (35.7)                  | 200 (31.0)               |          |
| Lower-middle                              | 281 (32.2)                 | 58 (25.6)                  | 223 (34.5)               |          |
| Higher-middle/High                        | 60 (6.9)                   | 16 (7.1)                   | 44 (6.8)                 |          |
| No response                               | 251 (28.8)                 | 72 (31.7)                  | 179 (27.7)               | 0.097    |
| Household income (euros)                  |                            |                            |                          |          |
| <500                                      | 204 (23.4)                 | 77 (33.9)                  | 127 (19.7)               |          |
| 501-1000                                  | 276 (31.6)                 | 60 (26.4)                  | 216 (33.4)               |          |
| 1001 – 2000                               | 146 (16.7)                 | 22 (9.7)                   | 124 (19.2)               |          |
| >2000                                     | 88 (10.1)                  | 14 (6.2)                   | 74 (11.5)                |          |
| No response                               | 159 (18.2)                 | 54 (23.8)                  | 105 (16.3)               | <0.001   |
| Region                                    |                            |                            |                          |          |
| Metropolitan area of Porto                | 504 (57.7)                 | 108 (47.6)                 | 396 (61.3)               |          |
| North-eastern region of Portugal          | 369 (42.3)                 | 119 (52.4)                 | 250 (38.7)               | <0.001   |
| <b>Cardiovascular risk factors</b>        |                            |                            |                          |          |
| Smoking habit                             |                            |                            |                          |          |
| Never                                     | 369 (42.3)                 | 184 (81.0)                 | 185 (28.6)               |          |
| Current                                   | 283 (32.4)                 | 34 (15.0)                  | 249 (38.5)               |          |
| Former                                    | 221 (25.3)                 | 9 (4.0)                    | 212 (32.8)               | <0.001   |
| Hypertension                              | 590 (67.6)                 | 185 (81.5)                 | 405 (62.7)               | <0.001   |
| Diabetes mellitus                         | 281 (32.2)                 | 88 (38.8)                  | 193 (29.9)               | 0.014    |
| Dyslipidaemia                             | 535 (61.4)                 | 144 (63.4)                 | 391 (60.6)               | 0.454    |
| BMI (kg/m <sup>2</sup> )                  |                            |                            |                          |          |
| Median (IQR)                              | 26.5 (18.0-44.6)           | 26.7 (19.5-37.9)           | 26.4 (18.2-39.2)         | 0.531    |
| Underweight                               | 11 (1.4)                   | 2 (0.9)                    | 9 (1.5)                  |          |
| Normal weight                             | 272 (33.4)                 | 80 (37.0)                  | 192 (32.1)               |          |
| Overweight                                | 366 (44.9)                 | 79 (36.6)                  | 287 (47.9)               |          |
| Obese                                     | 166 (20.4)                 | 55 (25.5)                  | 111 (18.5)               | 0.020    |
| Family history of CVD                     | 303 (34.7)                 | 73 (32.2)                  | 230 (35.6)               | 0.105    |
| <b>Previous medical history</b>           |                            |                            |                          |          |
| Renal failure                             | 64 (7.3)                   | 14 (6.1)                   | 50 (7.7)                 | 0.434    |
| Myocardial infarction                     | 156 (17.9)                 | 34 (15.0)                  | 122 (18.9)               | 0.186    |
| PCI                                       | 100 (12.4)                 | 18 (8.4)                   | 82 (13.8)                | 0.041    |
| CABG                                      | 34 (4.2)                   | 5 (2.3)                    | 29 (4.9)                 | 0.111    |
| Heart failure                             | 63 (7.5)                   | 21 (9.6)                   | 42 (6.8)                 | 0.172    |
| Dementia                                  | 7 (0.8)                    | 4 (1.8)                    | 3 (0.5)                  | 0.060    |
| <b>ACS type</b>                           |                            |                            |                          |          |
| STEMI/NC ACS                              | 379 (43.4)                 | 101 (44.5)                 | 278 (43.0)               |          |
| NSTEACS                                   | 494 (56.6)                 | 126 (55.5)                 | 368 (57.0)               | 0.703    |
| <b>Coronary anatomy</b>                   |                            |                            |                          |          |
| Non-obstructive disease                   | 57 (6.9)                   | 22 (10.6)                  | 35 (5.6)                 |          |
| Left anterior descending artery only      | 162 (19.5)                 | 38 (18.3)                  | 124 (19.9)               |          |
| Right and/or circumflex artery only       | 196 (23.6)                 | 46 (22.1)                  | 150 (24.0)               |          |
| Mixture                                   | 417 (50.1)                 | 102 (49.0)                 | 315 (50.5)               |          |
| Not submitted to coronary angiography     | 41 (4.7)                   | 19 (8.4)                   | 22 (3.4)                 | 0.004    |
| <b>Symptom questionnaire application</b>  |                            |                            |                          |          |
| Time from admission (hours), median (IQR) | 42.1 (25.0-68.0)           | 45.4 (28.5-72.3)           | 40.0 (24.0-67.4)         | 0.052    |

\*Values are number and percentage unless otherwise indicated.

ACS, acute coronary syndrome; BMI, body mass index; CABG, coronary artery bypass surgery; CVD, cardiovascular diseases; IQR, interquartile range; NSTEMI, non-ST elevation acute coronary syndrome; PCI, percutaneous coronary intervention; SD, standard deviation; STEMI/NC ACS, ST elevation myocardial infarction/non-classifiable acute coronary syndrome.

### Symptom characteristics by sex and age

Because differences in symptoms by sex and age were similar in direction and magnitude in STEMI/NC ACS and NSTEMI/ACS (Supplementary Tables 1 and 2), both types of ACS were analysed together.

Although pain was present in most patients, men presented with pain more frequently than did women (97.4% vs 94.3%,  $p=0.028$ ), with a higher sex difference among patients with 80 or more years old (88.0% vs 93.5%). Older patients presented less often pain, but the difference by age group in both sexes was not significant (Table 2). No difference was found in the location of pain by sex. Approximately 80% of patients felt chest pain (typical pain). Older women presented less frequently with chest pain and had chest pain and pain in other locations (mixture group) more often than did younger women ( $p=0.014$ ). Referred pain was observed more frequently in women and in younger patients (only significant for men,  $p=0.024$ ); again in the older age group, the difference between women and men was notorious (56.8% vs 39.7%, respectively). Atypical and mixture referred pain were more frequent in women than in men ( $p<0.001$ ), mainly in women aged  $\geq 65$  years ( $p=0.009$ ). Women felt pain with higher intensity than did men (median [IQR]: 9 [8–10] vs 8 [6–9],  $p<0.001$ ), without a difference by age (Table 2). Women presented with symptoms other than pain more frequently than did men (82.8% vs 68.9%,  $p<0.001$ ), with no difference by age group in both sexes (Table 2).

Considering symptoms other than pain, the AIC optimum value supported a preference for a three-cluster solution (AIC 7207.508, 6869.390, 6862.476, and 6870.372 for one, two, three, and four clusters, respectively). Cluster 1 had low endorsement probabilities for all items (no symptoms cluster). Cluster 2 had a high probability for dyspnoea at rest and sweating, and a low probability for the remaining items (dyspnoea and sweating cluster). Cluster 3 had high probabilities for all items (multiple symptoms cluster). This three-cluster model made sense conceptually to cardiologists of our team. Clusters counts and probabilities of occurrence of symptoms in established clusters are shown in Supplementary Table 3. Differences in proportions of women and men in the three clusters were observed ( $p<0.001$ , Table 2). Cluster 1 was the most prevalent, in which men presented with the no symptoms cluster more frequently (76.9% vs 62.6%) and the multiple symptoms cluster less frequently (4.8% vs 15.9%) than did women. Higher differences of multiple symptoms cluster proportions between women and men were observed among patients in the older age group. The proportion of dyspnoea and sweating cluster was similar in men and women (Table 2).

1  
2  
3 Approximately 45% of patients were at rest and 35% were under physical effort at the beginning of the  
4 episode. Older women were more frequently at rest at the beginning of the episode and younger women  
5 were more frequently under effort ( $p=0.011$ ). Less than 10% of patients identified a stressful event in the  
6 previous 24 hours, with no difference by sex, but among men, a younger age was slightly associated with  
7 this trigger ( $p=0.045$ , Table 2).  
8  
9  
10  
11  
12  
13  
14  
15  
16  
17  
18  
19  
20  
21  
22  
23  
24  
25  
26  
27  
28  
29  
30  
31  
32  
33  
34  
35  
36  
37  
38  
39  
40  
41  
42  
43  
44  
45  
46  
47  
48  
49  
50  
51  
52  
53  
54  
55  
56  
57  
58  
59  
60

For peer review only

Table 2. Clinical presentation of patients with acute coronary syndrome, by sex and age\*

|                                      | Women      |           |            |           |             | P <sup>†</sup> | Men       |            |            |           |            | P <sup>†</sup> | P <sup>#</sup> |
|--------------------------------------|------------|-----------|------------|-----------|-------------|----------------|-----------|------------|------------|-----------|------------|----------------|----------------|
|                                      | <=45       | 46-64     | 65-79      | >=80      | Total       |                | <=45      | 46-64      | 65-79      | >=80      | Total      |                |                |
| <b>Total</b>                         | 14 (6.2)   | 54 (23.8) | 109 (48.0) | 50 (22.0) | 227 (100.0) |                | 61 (9.4)  | 303 (46.9) | 220 (34.1) | 62 (9.6)  | 646 (100)  |                |                |
| <b>Pain</b>                          | 14 (100.0) | 52 (96.3) | 104 (95.4) | 44 (88.0) | 214 (94.3)  | 0.229          | 60 (98.4) | 297 (98.0) | 214 (97.3) | 58 (93.5) | 629 (97.4) | 0.228          | 0.028          |
| <b>Pain location<sup>†</sup></b>     |            |           |            |           |             |                |           |            |            |           |            |                |                |
| <b>Typical</b>                       | 12 (85.7)  | 43 (82.7) | 88 (85.4)  | 32 (72.7) | 175 (82.2)  |                | 53 (89.8) | 246 (83.7) | 175 (82.2) | 44 (75.9) | 518 (83.0) |                |                |
| <b>Atypical</b>                      | 1 (7.1)    | 9 (17.3)  | 5 (4.9)    | 6 (13.6)  | 17 (8.0)    | 0.014          | 3 (5.1)   | 33 (11.2)  | 30 (14.1)  | 10 (17.2) | 76 (12.2)  | 0.327          | 0.165          |
| <b>Mixture</b>                       | 1 (7.1)    | 0 (0.0)   | 10 (9.7)   | 6 (13.6)  | 17 (8.0)    |                | 3 (5.1)   | 15 (5.1)   | 8 (3.8)    | 4 (6.9)   | 30 (4.8)   |                |                |
| <b>Referred pain</b>                 | 9 (64.3)   | 41 (78.8) | 72 (69.2)  | 25 (56.8) | 147 (68.7)  | 0.129          | 38 (63.3) | 179 (60.3) | 126 (58.9) | 23 (39.7) | 366 (58.2) | 0.024          | 0.007          |
| <b>Radiation type<sup>‡</sup></b>    |            |           |            |           |             |                |           |            |            |           |            |                |                |
| <b>Typical</b>                       | 8 (88.9)   | 20 (48.8) | 28 (38.9)  | 7 (28.0)  | 63 (42.9)   | 0.009          | 28 (73.7) | 114 (64.4) | 67 (53.2)  | 10 (43.5) | 219 (60.2) | 0.104          | <0.001         |
| <b>Atypical</b>                      | 0 (0.0)    | 13 (31.7) | 18 (25.0)  | 13 (52.0) | 44 (29.9)   |                | 7 (18.4)  | 37 (20.9)  | 39 (31.0)  | 8 (34.8)  | 91 (25.0)  |                |                |
| <b>Mixture</b>                       | 1 (11.1)   | 8 (19.5)  | 26 (36.1)  | 5 (20.0)  | 40 (27.2)   |                | 3 (7.9)   | 26 (14.7)  | 20 (15.9)  | 5 (21.7)  | 54 (14.8)  |                |                |
| <b>Pain intensity<sup>§</sup></b>    | 9.5 (8-10) | 9 (8-10)  | 9 (8-9)    | 8 (8-9)   | 9 (8-10)    | 0.170          | 8 (7-10)  | 8 (6-9)    | 8 (6-9)    | 8 (7-9)   | 8 (6-9)    | 0.095          | <0.001         |
| <b>Symptom</b>                       | 11 (78.6)  | 45 (83.3) | 91 (83.5)  | 41 (82.0) | 188 (82.8)  | 0.947          | 43 (70.5) | 209 (69.0) | 151 (68.6) | 42 (67.7) | 445 (68.9) | 0.989          | <0.001         |
| <b>Symptom clusters<sup>  </sup></b> |            |           |            |           |             |                |           |            |            |           |            |                |                |
| <b>Cluster 1</b>                     | 7 (50.0)   | 41 (75.9) | 62 (56.9)  | 32 (64.0) | 142 (62.6)  | 0.183          | 43 (70.5) | 232 (76.6) | 170 (77.3) | 52 (83.9) | 497 (76.9) | 0.345          | <0.001         |
| <b>Cluster 2</b>                     | 5 (35.7)   | 8 (14.8)  | 28 (25.7)  | 8 (16.0)  | 49 (21.6)   |                | 15 (25.6) | 59 (19.5)  | 35 (15.9)  | 9 (14.5)  | 118 (18.3) |                |                |
| <b>Cluster 3</b>                     | 2 (14.3)   | 5 (9.3)   | 19 (17.4)  | 10 (20.0) | 36 (15.9)   |                | 3 (4.9)   | 12 (4.0)   | 15 (6.8)   | 1 (1.61)  | 31 (4.80)  |                |                |
| <b>Activity</b>                      |            |           |            |           |             |                |           |            |            |           |            |                |                |
| <b>Sleep</b>                         | 2 (15.4)   | 16 (32.0) | 11 (10.4)  | 7 (14.9)  | 36 (16.7)   | 0.011          | 6 (9.8)   | 65 (21.7)  | 35 (16.1)  | 13 (21.3) | 119 (18.6) | 0.087          | 0.816          |
| <b>Rest</b>                          | 5 (38.5)   | 18 (36.0) | 50 (47.2)  | 29 (61.7) | 102 (47.2)  |                | 34 (55.7) | 124 (41.3) | 105 (48.2) | 33 (54.1) | 296 (46.3) |                |                |
| <b>Exertion</b>                      | 6 (46.2)   | 16 (32.0) | 45 (42.5)  | 11 (23.4) | 78 (36.1)   |                | 21 (34.4) | 111 (37.0) | 78 (35.8)  | 15 (24.6) | 225 (35.2) |                |                |
| <b>Stress trigger</b>                | 2 (14.3)   | 6 (11.1)  | 11 (10.2)  | 3 (6.1)   | 22 (9.8)    | 0.700          | 11 (18.0) | 23 (7.7)   | 15 (6.9)   | 6 (9.8)   | 55 (8.6)   | 0.045          | 0.605          |

\*Values are number and percentage unless otherwise indicated. †Pain location: Typical - retrosternal, precordial, right thoracic, or bilateral thoracic; Atypical - epigastric, back, left arm or shoulder, right arm or shoulder, neck, or jaw; Mixture - typical and atypical location. ‡Radiation type: Typical - left arm or shoulder, right arm or shoulder, neck, or jaw; Atypical: retrosternal, precordial, right thoracic, bilateral thoracic, epigastric, or back regions; Mixture: typical and atypical irradiation. §Median (interquartile range). ||Symptom clusters: cluster 1 (no symptom cluster) - low endorsement probabilities for all items; cluster 2 (dyspnoea and sweating cluster) - high probability for dyspnoea at rest and sweating; cluster 3 (multiple symptoms cluster) - high probabilities for all items (dyspnoea at rest, exertional dyspnoea, sweating, nausea, vomiting, dizziness, blurry vision, presyncope, syncope, palpitation, weakness, other symptoms, other digestive symptoms and discomfort). ¶p for age differences within each sex; #p for differences between sexes.

### Multivariate models

Despite the higher probability of women below or above 65 years old to present without pain than men, no differences were observed in the adjusted pain frequency and location between men and women. Referred pain was more likely to be experienced by women (<65 years old: adjusted odds ratio [OR] 2.90, 95% confidence interval [95% CI] 1.47-5.72; ≥65 years old: 1.60 (0.99-2.60), p for interaction=0.528)). Moreover, women below or above 65 years old had a higher probability of having pain radiating to typical and atypical locations and of feeling pain with an intensity higher than 8 (Table 3). The association between intensity of pain and female sex was stronger for patients below 65 years old (interaction p=0.028) (Table 3).

The presence of at least one symptom other than pain occurred almost two times more often in women than in men. With cluster 1 as the reference, cluster 2 and 3 were positively associated with female sex, with the latter being statistically significant. The multiple symptoms cluster was almost 4-fold more likely in women than in men (3.92, 2.21-6.98 in the whole sample, interaction p=0.501) (Table 3).

No difference in the type of patients' activities at the beginning of the episode by sex was observed (Table 3).

Performance of age stratified multivariate models using the 55 years old cut-off revealed similar results to the observed using the 65 years old cut-off, with some differences mainly in the strength of association of some clinical presentation variables with sex among the younger age group (Supplementary Table 4). Although still not significant, among patients below 55 years old, women were less likely to present with typical chest pain (0.65, 0.23-1.86). A stronger association between female sex and referred pain, and intensity of pain higher than 8/10, among patients in the younger age groups was observed using the 55 instead of the 65 years cut-off. The remaining results were similar in direction and strength of association (Table 3 and Supplementary Table 4). The precision of the estimates is lower using the 55 cut-off, due to the small sample of patients below 55 years old.



**Table 3. Differences between women and men in clinical presentation of acute coronary syndrome, by age group**  
(men are the reference class).

| Symptoms                                                 | <65 years |           | ≥65 years |             | Interaction p-value | Adjusted for                                                                               |
|----------------------------------------------------------|-----------|-----------|-----------|-------------|---------------------|--------------------------------------------------------------------------------------------|
|                                                          | OR        | 95% CI    | OR        | 95% CI      |                     |                                                                                            |
| <b>Pain</b>                                              | 0.76      | 0.14-4.0  | 0.52      | 0.19-1.47   | 0.777               | Age, type of ACS, marital status, dyslipidaemia, CABG                                      |
| <b>Typical (chest) pain</b><br>(vs atypical or mixture)* | 0.97      | 0.44-2.14 | 1.71      | 0.90-3.23   | 0.973               | Age, type of ACS, coronary anatomy, region, smoking, dyslipidaemia, previous heart failure |
| <b>Referred pain</b>                                     | 2.90      | 1.47-5.72 | 1.60      | 0.99-2.60   | 0.528               | Age, type of ACS, coronary anatomy, region, income, social class, previous renal failure.  |
| <b>Radiation type†</b>                                   |           |           |           |             |                     |                                                                                            |
| <b>Typical</b>                                           | 1         | Reference | 1         | Reference   |                     | Age, type of ACS, employment status, region                                                |
| <b>Atypical</b>                                          | 1.49      | 0.70-3.20 | 1.38      | 0.72-2.66   | 0.415               |                                                                                            |
| <b>Mixture</b>                                           | 1.77      | 0.73-4.29 | 2.75      | 1.36-5.57   | 0.606               |                                                                                            |
| <b>Pain intensity</b><br>(higher than 8/10)              | 3.81      | 2.04-7.13 | 2.03      | 1.22-3.37   | 0.028               | Age, type of ACS, coronary anatomy, education, professional group, previous AMI            |
| <b>Symptoms</b>                                          | 1.98      | 1.00-3.91 | 1.85      | 1.10-3.12   | 0.799               | Age, type of ACS, region, previous AMI, previous heart failure                             |
| <b>Symptom clusters‡</b>                                 |           |           |           |             |                     |                                                                                            |
| <b>Cluster 1</b>                                         | 1         | Reference | 1         | Reference   |                     | Age, type of ACS, professional group, region, previous AMI                                 |
| <b>Cluster 2</b>                                         | 1.07      | 0.53-2.15 | 1.67      | 0.97-2.87   | 0.246               |                                                                                            |
| <b>Cluster 3</b>                                         | 3.14      | 1.15-8.62 | 4.23      | 2.03-8.81   | 0.501               |                                                                                            |
| <b>Activity group</b>                                    |           |           |           |             |                     |                                                                                            |
| <b>Sleeping</b>                                          | 1         | Reference | 1         | (Reference) |                     | Age, type of ACS, previous heart failure                                                   |
| <b>Rest</b>                                              | 0.68      | 0.33-1.38 | 1.38      | 0.74-2.57   | 0.284               |                                                                                            |
| <b>Exertion</b>                                          | 0.77      | 0.37-1.59 | 1.70      | 0.89-3.25   | 0.408               |                                                                                            |

ACS, acute coronary syndrome; AMI, acute myocardial infarction; CABG: coronary artery bypass surgery; CI, confidence interval; OR, odds ratio.

\*Pain location: Typical - retrosternal, precordial, right thoracic, or bilateral thoracic; Atypical - epigastric, back, left arm or shoulder, right arm or shoulder, neck, or jaw; Mixture - typical and atypical location.

†Radiation type: Typical - left arm or shoulder, right arm or shoulder, neck, or jaw; Atypical: retrosternal, precordial, right thoracic, bilateral thoracic, epigastric, or back regions; Mixture: typical and atypical irradiation.

‡Symptom clusters: cluster 1 (no symptom cluster) - low endorsement probabilities for all items; cluster 2 (dyspnoea and sweating cluster) - high probability for dyspnoea at rest and sweating; cluster 3 (multiple symptoms cluster) - high probabilities for all items (dyspnoea at rest, exertional dyspnoea, sweating, nausea, vomiting, dizziness, blurry vision, presyncope, syncope, palpitation, weakness, other symptoms, other digestive symptoms and discomfort).

### Clinical presentation and outcomes

Patients with a diagnosis of STEMI/NC ACS who presented with atypical or mixture pain took longer to seek medical care (135 vs 85 min.,  $p=0.012$ ) and had longer total ischemic times (414 vs 328 min.,  $p=0.080$ ) than patients with chest pain (Table 4). Among patients with NSTEMI/ACS, differences in time delays according to pain location were not significant. Patients with atypical or mixture pain presented more frequently with hemodynamic instability at admission (9.7% vs 4.6%,  $p=0.014$ ) and had also more often moderate to severe left ventricular systolic dysfunction (32.9 vs 24.9%,  $p=0.052$ ) than patients with chest pain. The 30-day mortality adjusted for GRACE 2.0 was not significantly different between patients with chest pain and those with atypical or mixture pain (Table 4).

Among patients with STEMI/NC ACS, the total ischemic time was longer for patients with the multiple symptoms cluster compared with patients who presented with the two other symptoms clusters (533 minutes vs 321 and 384,  $p=0.111$ ). Patients with the multiple symptom cluster presented more often with hemodynamic instability at admission than patients with the other symptoms clusters (13.4% vs 6.4% and 4.2%,  $p=0.034$ ). The mean 30-day mortality rate adjusted for the GRACE 2.0 risk score was significantly higher for patients presenting with the multiple symptom cluster (4.9% vs 0.9% for the two other clusters,  $p<0.001$ ) (Table 4).

Patients with atypical or mixture chest pain and patients with the multiple symptom cluster had higher mean GRACE and median CRUSADE risk scores (Table 4).

**Table 4.** Patient and system delays, severity indicators, risk stratification and 30-day mortality according to clinical presentation\*

|                                                                               | Typical (chest) pain† | Atypical or mixture pain | p      | No symptom cluster ‡ | Dyspnoea and sweating cluster | Multiple symptoms cluster | p      |
|-------------------------------------------------------------------------------|-----------------------|--------------------------|--------|----------------------|-------------------------------|---------------------------|--------|
| <b>Patient and system delays, median (IQR)</b>                                |                       |                          |        |                      |                               |                           |        |
| <b>STEMI/NC ACS</b>                                                           |                       |                          |        |                      |                               |                           |        |
| Symptom onset – FMC (min)                                                     | 85 (45-210)           | 135 (65-325)             | 0.012  | 90 (46-240)          | 90 (50-185)                   | 83 (45-430)               | 0.872  |
| Symptom onset-arterial access (min)                                           | 328 (192-1075)        | 414 (246-1335)           | 0.080  | 321 (194-1011)       | 384 (201-1440)                | 533 (323-1428)            | 0.111  |
| <b>NSTEMACS</b>                                                               |                       |                          |        |                      |                               |                           |        |
| Symptom onset – FMC (min)                                                     | 130 (60-393)          | 139 (60-335)             | 0.633  | 135 (60-390)         | 150 (60-390)                  | 113 (45-393)              | 0.795  |
| Hospital admission- coronary angiography time (hours)                         | 30 (18-57)            | 29 (20-48)               | 0.884  | 30 (18-56)           | 35 (18-70)                    | 28 (20-72)                | 0.385  |
| <b>Admission variables</b>                                                    |                       |                          |        |                      |                               |                           |        |
| Heart rate, mean (SD), bpm                                                    | 77 (18)               | 80 (24)                  | 0.117  | 78 (19)              | 77 (19)                       | 78 (28)                   | 0.923  |
| Systolic blood pressure, mean (SD), mmHg                                      | 144 (49)              | 139 (30)                 | 0.212  | 145 (59)             | 141 (30)                      | 136 (33)                  | 0.364  |
| Hemodynamic instability at admission§                                         | 32 (4.6)              | 14 (9.7)                 | 0.014  | 41 (6.4)             | 7 (4.2)                       | 9 (13.4)                  | 0.034  |
| <b>Risk stratification</b>                                                    |                       |                          |        |                      |                               |                           |        |
| Calculated GRACE risk score, mean (SD)                                        | 134 (36)              | 147 (39)                 | <0.001 | 137 (37)             | 138 (35)                      | 149 (44)                  | 0.041  |
| Calculated CRUSADE risk score, median (IQR)                                   | 21 (11-34)            | 25 (14-41)               | 0.012  | 22 (12-36)           | 23 (10-36)                    | 30 (16-47)                | 0.019  |
| <b>Moderate or severe left ventricular systolic dysfunction</b>               | 169 (24.9)            | 46 (32.9)                | 0.052  | 164 (26.4)           | 55 (33.3)                     | 17 (25.4)                 | 0.187  |
| <b>30-day mortality rate adjusted for the GRACE 2.0 risk score, mean (SD)</b> | 2.0 (4.0)             | 1.3 (1.4)                | 0.521  | 0.9 (2.0)            | 0.9 (2.0)                     | 4.9 (5.5)                 | <0.001 |

IQR, interquartile range; NSTEMACS, non-ST elevation acute coronary syndrome; SD, standard deviation; STEMI/NC ACS, ST elevation myocardial infarction/Non-classifiable acute coronary syndrome.

\*Values are number and percentage unless otherwise indicated.

Total may not add to 100% due to missing data.

†Chest pain: retrosternal, precordial, right thoracic, or bilateral thoracic.

‡No symptom cluster: low endorsement probabilities for all items; Dyspnoea and sweating cluster: high probability for dyspnoea at rest and sweating; Multiple symptoms cluster: high probabilities for all items (dyspnoea at rest, exertional dyspnoea, sweating, nausea, vomiting, dizziness, blurry vision, presyncope, syncope, palpitation, weakness, other symptoms, other digestive symptoms and discomfort)

§Killip class III or IV; or shock at admission.

## DISCUSSION

In our study, after adjustment, no differences in the frequency and location of pain by sex were observed. Referred pain, pain radiating to typical and atypical locations, and pain of higher intensity were more likely to occur among women. Women were also more likely than men to present with symptoms other than pain. Three clusters of symptoms other than pain were identified. Women were more likely to present with the multiple symptoms cluster. Presenting with the multiple symptoms cluster was associated with a higher mean 30-day mortality rate adjusted for the GRACE 2.0 risk score.

Differences between women and men in perception of symptoms of ACS might be explained by anatomical, physiological, biological, and psychosocial differences that influence each other.<sup>9, 21</sup> We measured several variables of these different domains. Differences in symptom presentation by sex might be the result of differences in response to history-taking,<sup>10</sup> differences in neural receptors and pathways involved in pain, and subtle differences in the location and type of atherosclerotic lesions.<sup>22, 23</sup> Our findings of similar ACS symptoms between women and men are consistent with previous studies,<sup>7, 24</sup> as well as our finding that women are more likely to have atypical presentations.<sup>9</sup> We observed that women have a higher likelihood of atypical referred pain and of several concomitant symptoms other than pain, common to other cardiac and non-cardiac diagnoses.

In our study, chest pain was the most frequent symptom in both sexes, consistent with previous studies.<sup>25-27</sup> Among those with pain, typical chest pain was observed in 82% of patients, regardless of sex. The remaining patients had pain in less typical locations and were thus prone to misdiagnosis and undertreatment and, consequently, to worse outcomes.<sup>28</sup> Considering differences in characteristics of pain by sex, studies suggested that women, in particular older women, were less likely to have the chief complaint of chest pain associated with acute myocardial infarction; while after adjustment, among patients with 65 or less years old, female sex was no longer a significant predictor.<sup>29</sup> Studies reported that chest pain did not differ between women and men,<sup>9</sup> others that women have pain in the neck and back more often than men,<sup>30, 31</sup> without distinguishing between direct and referred pain. In our study, referred pain was observed in 61% of patients, was more frequent in women, and typical referred pain was only observed in 33%. Notably, a study on diagnostic acuity of ACS symptoms showed that shoulder and arm pain was predictive of the diagnosis of ACS for women only.<sup>24</sup> Another study (GENESIS PRAXY) on sex differences in ACS symptom presentation in patients with 55 years old or younger showed that being a woman was independently associated with ACS presentation without chest pain.<sup>27</sup> Although the

1  
2  
3 association was not significant, and relied on a small sample of patients, our finding that women with 55  
4 years old or younger were less likely to present with typical chest pain is in line with the GENESIS  
5 PRAXY study result.<sup>27</sup> We were also able to find a stronger association between female sex and presence  
6 of referred pain, and of pain with intensity higher than 8 among the younger subgroups of patients (below  
7 55 and 65 years old). These findings stress the relevance of taking into account age for studying the  
8 association between sex and clinical presentation. However, further conclusions on the role of age to this  
9 relation are limited by the small number of women below 55 included in our study. Differences in age  
10 distribution, in clinical presentation measuring, in selection and definition of confounder variables limit  
11 conclusive comparisons of studies evaluating differences in frequency and location of pain between  
12 women and men.  
13

14  
15 According to previous studies, with regard to other symptoms, a higher proportion of women have less  
16 typical symptoms than men.<sup>8, 31</sup> Women have also reported other symptoms, such as indigestion,  
17 palpitations, nausea, numbness in the hands, and unusual fatigue, more frequently than men.<sup>9</sup> In our  
18 cohort, three symptom clusters were identified. Women had the multiple symptoms cluster more  
19 frequently than did men, characterized by high probabilities for all symptoms. Age did not change the  
20 association between female sex and presentation with symptoms other than pain and with the multiple  
21 symptoms cluster. According to Rosenfeld et al. women are more likely to cluster in a similar class,  
22 called the heavy symptom burden class.<sup>32</sup> With regard to ACS symptom clustering, there are  
23 contradictory findings on identified clusters, the proportion of patients per cluster, and differences  
24 between clusters regarding demographic factors. In our study, cluster 1 and 3 (low and high probabilities  
25 for all symptoms, respectively) are in line with observations of other settings.<sup>18, 33</sup> A recent systematic  
26 review of symptom clusters in cardiovascular disease<sup>34</sup> identified clusters with the most symptoms and  
27 clusters with the lowest number of symptoms. Our dyspnoea and sweating cluster has two common  
28 symptoms with the Riegel et al.<sup>26</sup> stress symptoms cluster, which includes shortness of breath, sweating,  
29 nausea, indigestion, dread, and anxiety.  
30

31  
32 Methodological differences related to sampling and measuring might explain these different results.  
33  
34 Strengths of our study include consecutive sampling, a questionnaire with detailed clinical information  
35 was systematically applied, and we adjusted for several confounding variables.  
36

37  
38 The value of symptoms for diagnosis of ACS varies across studies.<sup>14, 35, 36</sup> Overall, the diagnostic  
39 performance of chest pain characteristics for diagnosis is limited, with likelihood ratios close to 1.<sup>37</sup>  
40  
41  
42  
43  
44  
45  
46  
47  
48  
49  
50  
51  
52

1  
2  
3 Sensitivity for individual symptoms of ACS, using the 13-Item Acute Coronary Syndrome Checklist,  
4 ranges from 27% to 67% for women and 14% to 72% for men. Additionally, specificity ranges from 33%  
5 to 78% for women and 34% to 78% for men, with different associations between some symptoms and  
6 diagnosis of ACS by sex.<sup>24</sup> However, physicians still base the likelihood of ACS mainly on symptoms  
7 and use the electrocardiogram to rule in the diagnosis.<sup>38</sup> Evaluation of these patients is mostly unchanged,  
8 without implementation of evidence-based assessment tools in clinical practice to improve diagnostic  
9 accuracy. Public health messages should take into account the complexity of presenting symptoms of  
10 ACS, particularly the significant proportion of women and men with ACS without typical chest pain.  
11 Additionally, there is a higher likelihood of atypical referred pain and multiple concomitant symptoms in  
12 women. These factors should be accounted for to encourage timely and appropriate care of patients with  
13 ACS.

14  
15 Presenting without chest pain and with the multiple symptoms cluster was associated with several  
16 markers of higher ACS severity and longer time delays, particularly significant among patients with  
17 STEMI/NC ACS. In our study, presenting with the multiple symptoms cluster, but not with atypical or  
18 mixture location of pain, was associated with a higher mean 30-day mortality adjusted for GRACE risk  
19 score. These results are consistent with data from the GRACE registry, that showed that patients with  
20 symptoms other than pain experienced greater morbidity and higher in-hospital mortality across the  
21 spectrum of ACS.<sup>28</sup> Other registry showed that the higher in-hospital mortality observed among women  
22 and men without chest pain, decreased or even reversed with advanced age.<sup>39</sup> Mortality is adjusted for  
23 GRACE risk score, however we cannot conclude that the difference in outcome observed is explained by  
24 symptoms other than pain per se. Previous studies showed that the higher in-hospital mortality of ACS  
25 patients who presented without chest pain was mostly due to late hospital arrival, comorbidities and  
26 underuse of medications and invasive procedures.<sup>6, 39, 40</sup> These studies focused mainly on presence of  
27 chest pain to define atypical presentation and used medical record reviews to characterize clinical  
28 presentation. More studies are needed to further explore the association between symptoms other than  
29 pain and outcomes.

### Limitations

Participants were interviewed as soon as possible after admission, but this does not obviate the retrospective nature of data collection and the possibility of recall bias. Furthermore preceding interviews by physicians may have influenced answers to the questionnaire, however different consequences in women and men are not expected. The results of this study are valid for stable patients, who were admitted to the hospital and were able to answer the questionnaire in the acute phase of ACS. This type of study misses patients who die before reaching the hospital, patients who do not seek medical care, patients who are mistakenly discharged or misdiagnosed and admitted to non-cardiology departments. This sample selection process may contribute to underestimate the true prevalence of ACS atypical presentation in women and men.<sup>27</sup> For patients who were eligible but not enrolled only information on sex, age and type of ACS was available. Patients who died before the interview were older ( $81.5 \pm 11.8$  vs  $64.6 \pm 13.1$  years,  $p < 0.001$ ), were more often women (66.7% vs 26.0%,  $p < 0.001$ ), and more frequently had a diagnosis of STEMI (81.3% vs 43.4%,  $p = 0.003$ ) than did participants. Patients who were discharged or transferred to another hospital before the interview had STEMI less often (25.0% vs 43.4%,  $p = 0.005$ ) and patients who were not enrolled because of clinical instability or inability to understand the questionnaire were older. Patients who refused to participate were older ( $72.7 \pm 11.0$  vs  $64.0 \pm 13.0$  years,  $p < 0.001$ ), were less often partnered (65.7% vs 76.8%,  $p = 0.036$ ), and had little formal education (43.1% vs 19.7%,  $p < 0.001$ ) compared with participants. Except for deceased patients, no difference in sex proportion was observed between participants and non-participants. We cannot exclude that some of the sex differences were caused by selection bias because of a higher risk of non-inclusion of women due to death in the early hours of admission, or due to a possible higher probability of misdiagnosis in women, particularly those with unstable angina.<sup>41</sup> Considering that atypical presentation is associated with a worse prognosis and with a higher probability of misdiagnosis, the proportion of patients with ACS presenting without typical chest pain or that of women with an atypical presentation could be even higher.<sup>28</sup>

### CONCLUSION

This study shows no significant differences in the frequency and location of pain by sex, but approximately 20% of patients do not present with chest pain, regardless of sex. Women are more likely to report referred pain and multiple symptoms simultaneously. Presentation with the multiple symptoms cluster pain is associated with higher 30-day mortality adjusted for GRACE score. Health education

1  
2  
3 messages should take into account the complexity of presentation of ACS and emphasize the possible  
4 non-chest location of pain in both sexes and the higher probability of concomitant symptoms other than  
5 pain in women. Further sex-stratified analysis of ACS presentation, also addressing the role of age for the  
6 relation between sex and clinical presentation, is required to determine the diagnostic accuracy of  
7 symptoms by sex.  
8  
9  
10  
11  
12  
13  
14  
15  
16  
17  
18  
19  
20  
21  
22  
23  
24  
25  
26  
27  
28  
29  
30  
31  
32  
33  
34  
35  
36  
37  
38  
39  
40  
41  
42  
43  
44  
45  
46  
47  
48  
49  
50  
51  
52  
53  
54  
55  
56  
57  
58  
59  
60

For peer review only



1  
2  
3  
4 **Figure 1.** Flow chart of the study population  
5  
6  
7  
8  
9  
10  
11  
12  
13  
14  
15  
16  
17  
18  
19  
20  
21  
22  
23  
24  
25  
26  
27  
28  
29  
30  
31  
32  
33  
34  
35  
36  
37  
38  
39  
40  
41  
42  
43  
44  
45  
46  
47  
48  
49  
50  
51  
52  
53  
54  
55  
56  
57  
58  
59  
60

For peer review only

1  
2  
3 **Funding:** This study was funded by FEDER through the Operational Programme Competitiveness and  
4 Internationalization and national funding from the Foundation for Science and Technology – FCT  
5 (Portuguese Ministry of Science, Technology and Higher Education) (FCOMP-01-0124-FEDER-  
6 028709), under the project “Inequalities in coronary heart disease management and outcomes in Portugal”  
7 (Ref. FCT PTDC/DTP-EPI/0434/2012) and Unidade de Investigação em Epidemiologia - Instituto de  
8 Saúde Pública da Universidade do Porto (EPIUnit) (POCI-01-0145-FEDER-006862;  
9 Ref.UID/DTP/04750/2013).

10  
11  
12  
13  
14  
15  
16  
17 **Conflicts of interest:** All authors have completed the ICMJE uniform disclosure form at  
18 [www.icmje.org/coi\\_disclosure.pdf](http://www.icmje.org/coi_disclosure.pdf) and declare: all authors had financial support through grants from the  
19 Foundation for Science and Technology – FCT (Portuguese Ministry of Science, Technology and Higher  
20 Education) and from Unidade de Investigação em Epidemiologia - Instituto de Saúde Pública da  
21 Universidade do Porto. No financial relationships with any organisations that might have an interest in the  
22 submitted work in the previous three years; no other relationships or activities that could appear to have  
23 influenced the submitted work.

### 31 **Contributors**

32  
33 Carla Araújo and Ana Azevedo had the original idea to develop the EPIHeart cohort study and were  
34 responsible for acquiring the study grant. Carla Araújo raised the hypotheses, participated in data  
35 collection and field work, analysed and interpreted the data, and drafted the first version of the  
36 manuscript. Olga Laszczyńska analysed and interpreted the data, participated in drafting and revising the  
37 first draft of the manuscript. Marta Viana and Andreia Borges participated in data collection, field work  
38 and interpretation of the data. Filipa Melão and Ana Henriques interpreted data. Milton Severo analysed  
39 and interpreted the data. Maria Júlia Maciel and Ilídio Moreira were involved in the conception of the  
40 study and in field work. Ana Azevedo was the responsible for the conception and development of the  
41 study, analysed and interpreted the data, participated in drafting and revising the first draft of the  
42 manuscript. All authors were involved in writing the paper, in revising it critically and approved the final  
43 version of the submitted manuscript.

### 53 **Data sharing**

54  
55 Data are available by email the corresponding author at [carla-r-araujo@hotmail.com](mailto:carla-r-araujo@hotmail.com).

## References

1. Mendis S, Global Status Report on noncommunicable diseases 2014. Report, World Health Organization, 2014.
2. Nichols M, Townsend N, Scarborough P and Rayner M. Cardiovascular disease in Europe 2014: epidemiological update. *Eur Heart J* 2014; 35: 2929.
3. Canto JG, Rogers WJ, Goldberg RJ, et al. Association of age and sex with myocardial infarction symptom presentation and in-hospital mortality. *JAMA* 2012; 307: 813-22.
4. Doggen CJ, Zwerink M, Droste HM, et al. Prehospital paths and hospital arrival time of patients with acute coronary syndrome or stroke, a prospective observational study. *BMC Emerg Med* 2016; 16: 3.
5. Annemans L, Danchin N, Van de Werf F, et al. Prehospital and in-hospital use of healthcare resources in patients surviving acute coronary syndromes: an analysis of the EPICOR registry. *Open Heart* 2016; 3: e000347.
6. Manfrini O, Ricci B, Cenko E, et al. Association between comorbidities and absence of chest pain in acute coronary syndrome with in-hospital outcome. *Int J Cardiol* 2016; 217 Suppl: S37-43.
7. DeVon HA and Zerwic JJ. Symptoms of acute coronary syndromes: are there gender differences? A review of the literature. *Heart Lung* 2002; 31: 235-45.
8. DeVon HA and Zerwic JJ. The symptoms of unstable angina: do women and men differ? *Nurs Res* 2003; 52: 108-18.
9. DeVon HA, Ryan CJ, Ochs AL and Shapiro M. Symptoms across the continuum of acute coronary syndromes: differences between women and men. *Am J Crit Care* 2008; 17: 14-24.
10. Safdar B, Nagurney JT, Anise A, et al. Gender-specific research for emergency diagnosis and management of ischemic heart disease: proceedings from the 2014 Academic Emergency Medicine Consensus Conference Cardiovascular Research Workgroup. *Acad Emerg Med* 2014; 21: 1350-60.
11. Thygesen K, Alpert JS, Jaffe AS, et al. Third universal definition of myocardial infarction. *Eur Heart J* 2012; 33: 2551-67.
12. Statistics. Statistics Portugal. "Portuguese Classification of Occupations 2010" [accessed on November 15, 2016]. Available at: [https://www.ine.pt/xportal/xmain?xpid=INE&xpgid=ine\\_publicacoes&PUBLICACOESpub\\_boui=107961853&PUBLICACOESmodo=2](https://www.ine.pt/xportal/xmain?xpid=INE&xpgid=ine_publicacoes&PUBLICACOESpub_boui=107961853&PUBLICACOESmodo=2). 2011.
13. Swap CJ and Nagurney JT. Value and limitations of chest pain history in the evaluation of patients with suspected acute coronary syndromes. *JAMA* 2005; 294: 2623-9.
14. Eslick GD. Usefulness of chest pain character and location as diagnostic indicators of an acute coronary syndrome. *Am J Cardiol* 2005; 95: 1228-31.
15. Canto AJ, Kiefe CI, Goldberg RJ, et al. Differences in symptom presentation and hospital mortality according to type of acute myocardial infarction. *Am Heart J* 2012; 163: 572-9.
16. Roffi M, Patrono C, Collet JP, et al. 2015 ESC Guidelines for the management of acute coronary syndromes in patients presenting without persistent ST-segment elevation: Task Force for the Management of Acute Coronary Syndromes in Patients Presenting without Persistent ST-Segment Elevation of the European Society of Cardiology (ESC). *Eur Heart J* 2016; 37: 267-315.
17. Amsterdam EA, Wenger NK, Brindis RG, et al. 2014 AHA/ACC guideline for the management of patients with non-ST-elevation acute coronary syndromes: a report of the American College of Cardiology/American Heart Association Task Force on Practice Guidelines. *Circulation* 2014; 130: e344-426.
18. Ryan CJ, DeVon HA, Horne R, et al. Symptom clusters in acute myocardial infarction: a secondary data analysis. *Nurs Res* 2007; 56: 72-81.
19. Miaskowski C, Dodd M and Lee K. Symptom clusters: the new frontier in symptom management research. *J Natl Cancer Inst Monogr* 2004: 17-21.

20. Schiele F, Gale CP, Bonnefoy E, et al. Quality indicators for acute myocardial infarction: A position paper of the Acute Cardiovascular Care Association. *Eur Heart J Acute Cardiovasc Care* 2017; 6: 34-59.
21. Legato MJ. Gender and the heart: sex-specific differences in normal anatomy and physiology. *J Genet Specif Med* 2000; 3: 15-8.
22. Foreman RD. Mechanisms of cardiac pain. *Annu Rev Physiol* 1999; 61: 143-67.
23. Arslanian-Engoren C and Engoren M. Physiological and anatomical bases for sex differences in pain and nausea as presenting symptoms of acute coronary syndromes. *Heart Lung* 2010; 39: 386-93.
24. Devon HA, Rosenfeld A, Steffen AD and Daya M. Sensitivity, specificity, and sex differences in symptoms reported on the 13-item acute coronary syndrome checklist. *J Am Heart Assoc* 2014; 3: e000586.
25. Arslanian-Engoren C, Patel A, Fang J, et al. Symptoms of men and women presenting with acute coronary syndromes. *Am J Cardiol* 2006; 98: 1177-81.
26. Riegel B, Hanlon AL, McKinley S, et al. Differences in mortality in acute coronary syndrome symptom clusters. *Am Heart J* 2010; 159: 392-8.
27. Khan NA, Daskalopoulou SS, Karp I, et al. Sex differences in acute coronary syndrome symptom presentation in young patients. *JAMA Intern Med* 2013; 173: 1863-71.
28. Brieger D, Eagle KA, Goodman SG, et al. Acute coronary syndromes without chest pain, an underdiagnosed and undertreated high-risk group: insights from the Global Registry of Acute Coronary Events. *Chest* 2004; 126: 461-9.
29. Milner KA, Vaccarino V, Arnold AL, Funk M and Goldberg RJ. Gender and age differences in chief complaints of acute myocardial infarction (Worcester Heart Attack Study). *Am J Cardiol* 2004; 93: 606-8.
30. Everts B, Karlson BW, Wahrborg P, Hedner T and Herlitz J. Localization of pain in suspected acute myocardial infarction in relation to final diagnosis, age and sex, and site and type of infarction. *Heart Lung* 1996; 25: 430-7.
31. Goldberg R, Goff D, Cooper L, et al. Age and sex differences in presentation of symptoms among patients with acute coronary disease: the REACT Trial. Rapid Early Action for Coronary Treatment. *Coron Artery Dis* 2000; 11: 399-407.
32. Rosenfeld AG, Knight EP, Steffen A, et al. Symptom clusters in patients presenting to the emergency department with possible acute coronary syndrome differ by sex, age, and discharge diagnosis. *Heart Lung* 2015; 44: 368-75.
33. Lindgren TG, Fukuoka Y, Rankin SH, et al. Cluster analysis of elderly cardiac patients' prehospital symptomatology. *Nurs Res* 2008; 57: 14-23.
34. DeVon HA, Vuckovic K, Ryan CJ, et al. Systematic review of symptom clusters in cardiovascular disease. *Eur J Cardiovasc Nurs* 2017; 16: 6-17.
35. Swap CJ and Nagurney JT. Value and limitations of chest pain history in the evaluation of patients with suspected acute coronary syndromes. *JAMA* 2005; 294: 2623-9.
36. Bruyninckx R, Aertgeerts B, Bruyninckx P and Buntinx F. Signs and symptoms in diagnosing acute myocardial infarction and acute coronary syndrome: a diagnostic meta-analysis. *Br J Gen Pract* 2008; 58: 105-11.
37. Rubini Gimenez M, Reiter M, Twerenbold R and et al. Sex-specific chest pain characteristics in the early diagnosis of acute myocardial infarction. *JAMA Intern Med* 2014; 174: 241-9.
38. Kamali A, Soderholm M and Ekelund U. What decides the suspicion of acute coronary syndrome in acute chest pain patients? *BMC Emerg Med* 2014; 14: 9.
39. Canto JG, Rogers WJ, Goldberg RJ, et al. Association of Age and Sex With Myocardial Infarction Symptom Presentation and In-Hospital Mortality. *JAMA* 2012; 307: 813-22.
40. Canto JG, Shlipak MG, Rogers WJ, et al. Prevalence, clinical characteristics, and mortality among patients with myocardial infarction presenting without chest pain. *JAMA* 2000; 283: 3223-9.

1  
2  
3 41. Pope JH, Aufderheide TP, Ruthazer R, et al. Missed diagnoses of acute cardiac ischemia in  
4 the emergency department. *N Engl J Med* 2000; 342: 1163-70.  
5  
6  
7  
8  
9  
10  
11  
12  
13  
14  
15  
16  
17  
18  
19  
20  
21  
22  
23  
24  
25  
26  
27  
28  
29  
30  
31  
32  
33  
34  
35  
36  
37  
38  
39  
40  
41  
42  
43  
44  
45  
46  
47  
48  
49  
50  
51  
52  
53  
54  
55  
56  
57  
58  
59  
60

For peer review only

1  
2  
3  
4  
5  
6  
7  
8  
9  
10  
11  
12  
13  
14  
15  
16  
17  
18  
19  
20  
21  
22  
23  
24  
25  
26  
27  
28  
29  
30  
31  
32  
33  
34  
35  
36  
37  
38  
39  
40  
41  
42  
43  
44  
45  
46  
47  
48  
49  
50  
51  
52  
53  
54  
55  
56  
57  
58  
59  
60

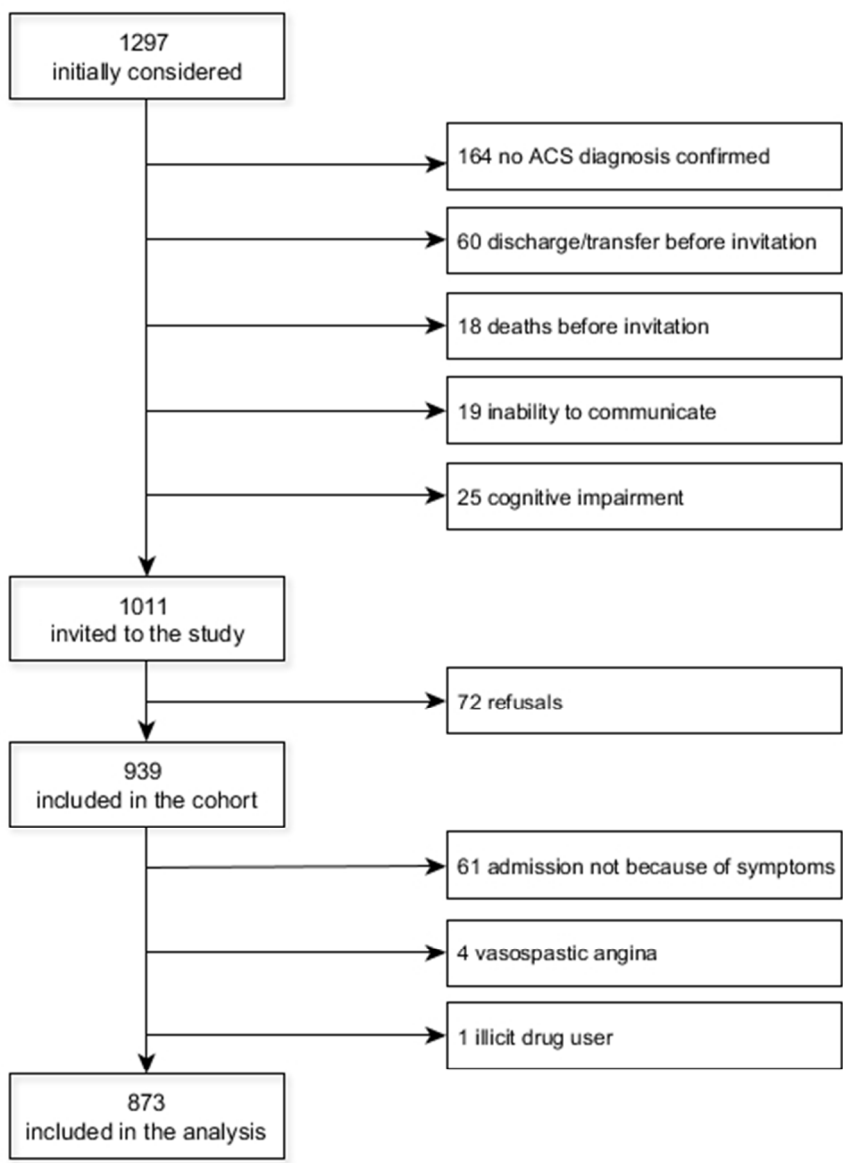

Figure 1. Flow chart of the study population

41x56mm (300 x 300 DPI)

Supplementary Table 1. Clinical presentation of patients with ST elevation myocardial infarction/non-classifiable acute coronary syndrome, by sex and age\*

|                                      | Women      |           |           |           |             | P <sup>†</sup> | Men        |            |           |             |            | P <sup>†</sup> | P <sup>#</sup> |
|--------------------------------------|------------|-----------|-----------|-----------|-------------|----------------|------------|------------|-----------|-------------|------------|----------------|----------------|
|                                      | <=45       | 46-64     | 65-79     | >=80      | Total       |                | <=45       | 46-64      | 65-79     | >=80        | Total      |                |                |
| <b>Total</b>                         | 6 (5.9)    | 22 (21.8) | 53 (52.5) | 20 (19.8) | 101 (100.0) |                | 37 (13.3)  | 144 (51.8) | 77 (27.7) | 20 (7.2)    | 278 (100)  |                |                |
| <b>Pain</b>                          | 6 (100.0)  | 21 (95.5) | 52 (98.1) | 16 (80.0) | 95 (94.1)   | 0.039          | 36 (97.3)  | 142 (98.6) | 73 (94.8) | 20 (100.0)  | 271 (97.5) | 0.338          | 0.106          |
| <b>Pain location<sup>†</sup></b>     |            |           |           |           |             |                |            |            |           |             |            |                |                |
| <b>Typical</b>                       | 5 (83.3)   | 17 (81.0) | 44 (84.6) | 9 (56.3)  | 75 (78.9)   |                | 31 (88.6)  | 120 (85.1) | 55 (76.4) | 13 (65.0)   | 219 (81.7) |                |                |
| <b>Atypical</b>                      | 1 (16.7)   | 4 (19.0)  | 2 (3.8)   | 5 (31.3)  | 12 (12.6)   |                | 1 (2.9)    | 17 (12.1)  | 14 (19.4) | 5 (25.0)    | 37 (13.8)  |                |                |
| <b>Mixture</b>                       | 0 (0.0)    | 0 (0.0)   | 6 (11.5)  | 2 (12.5)  | 8 (8.4)     | 0.021          | 3 (8.6)    | 4 (2.8)    | 3 (4.2)   | 2 (10.2)    | 12 (4.5)   | 0.032          | 0.347          |
| <b>Referred pain</b>                 | 4 (66.7)   | 18 (85.7) | 38 (73.1) | 8 (50.0)  | 68 (71.6)   | 0.114          | 24 (66.7)  | 90 (63.4)  | 51 (69.9) | 7 (35.0)    | 172 (63.5) | 0.038          | 0.152          |
| <b>Radiation type<sup>‡</sup></b>    |            |           |           |           |             |                |            |            |           |             |            |                |                |
| <b>Typical</b>                       | 3 (75.0)   | 8 (44.4)  | 17 (44.7) | 1 (12.5)  | 29 (42.6)   |                | 19 (79.2)  | 53 (59.6)  | 26 (51.0) | 3 (42.9)    | 101 (59.1) |                |                |
| <b>Atypical</b>                      | 0 (0.0)    | 5 (27.8)  | 10 (26.3) | 4 (50.0)  | 19 (27.9)   |                | 5 (20.8)   | 21 (23.6)  | 9 (17.6)  | 3 (42.9)    | 38 (22.2)  |                |                |
| <b>Mixture</b>                       | 1 (25.0)   | 5 (27.8)  | 11 (28.9) | 3 (37.5)  | 20 (29.4)   | 0.504          | 0 (0.0)    | 15 (16.9)  | 16 (31.4) | 1 (14.3)    | 32 (18.7)  | 0.018          | 0.060          |
| <b>Pain intensity<sup>§</sup></b>    | 9.5 (8-10) | 9 (8-10)  | 9 (8-10)  | 8.5 (8-9) | 9 (8-10)    | 0.784          | 9 (7.5-10) | 8 (7-10)   | 8 (6.5-9) | 7.5 (6.5-9) | 8 (7-10)   | 0.064          | <0.001         |
| <b>Symptom</b>                       | 5 (83.3)   | 20 (90.9) | 47 (88.7) | 17 (85.0) | 89 (88.1)   | 0.794          | 23 (62.2)  | 105 (72.9) | 61 (79.2) | 14 (70.0)   | 203 (73.0) | 0.283          | 0.002          |
| <b>Symptom clusters<sup>  </sup></b> |            |           |           |           |             |                |            |            |           |             |            |                |                |
| <b>Cluster 1</b>                     | 2 (33.3)   | 18 (81.8) | 27 (50.9) | 11 (55.0) | 58 (57.4)   |                | 26 (70.3)  | 102 (70.8) | 54 (70.1) | 16 (80.0)   | 198 (71.2) |                |                |
| <b>Cluster 2</b>                     | 3 (50.0)   | 2 (9.1)   | 16 (30.2) | 4 (20.0)  | 25 (24.8)   |                | 9 (24.3)   | 36 (25.0)  | 19 (24.7) | 3 (15.0)    | 67 (24.1)  |                |                |
| <b>Cluster 3</b>                     | 1 (16.7)   | 2 (9.1)   | 10 (18.9) | 5 (25.0)  | 18 (17.8)   | 0.132          | 2 (5.4)    | 6 (4.2)    | 4 (5.2)   | 1 (5.0)     | 13 (4.7)   | 0.967          | <0.001         |
| <b>Activity</b>                      |            |           |           |           |             |                |            |            |           |             |            |                |                |
| <b>Sleep</b>                         | 1 (16.7)   | 3 (14.3)  | 4 (7.8)   | 3 (15.8)  | 11 (11.3)   |                | 5 (13.5)   | 29 (20.1)  | 10 (13.0) | 4 (20.0)    | 48 (17.3)  |                |                |
| <b>Rest</b>                          | 3 (50.0)   | 9 (42.9)  | 22 (43.1) | 14 (73.7) | 48 (49.5)   |                | 19 (51.4)  | 65 (45.1)  | 43 (55.8) | 13 (65.0)   | 140 (50.4) |                |                |
| <b>Exertion</b>                      | 2 (33.3)   | 9 (42.9)  | 25 (49.0) | 2 (10.5)  | 38 (39.2)   | 0.069          | 13 (35.1)  | 50 (34.7)  | 24 (31.2) | 3 (15.0)    | 90 (32.4)  | 0.393          | 0.274          |
| <b>Stress trigger</b>                | 1 (16.7)   | 2 (9.1)   | 4 (7.5)   | 3 (15.8)  | 10 (10.0)   | 0.519          | 5 (13.5)   | 11 (7.7)   | 6 (7.9)   | 2 (10.0)    | 24 (8.7)   | 0.669          | 0.697          |

\*Values are number and percentage unless otherwise indicated. †Pain location: Typical - retrosternal, precordial, right thoracic, or bilateral thoracic; Atypical - epigastric, back, left arm or shoulder, right arm or shoulder, neck, or jaw; Mixture - typical and atypical location. ‡Radiation type: Typical - left arm or shoulder, right arm or shoulder, neck, or jaw; Atypical: retrosternal, precordial, right thoracic, bilateral thoracic, epigastric, or back regions; Mixture: typical and atypical irradiation. §Median (interquartile range). ||Symptom clusters: cluster 1 (no symptom cluster) - low endorsement probabilities for all items; cluster 2 (dyspnoea and sweating cluster) - high probability for dyspnoea at rest and sweating; cluster 3 (multiple symptoms cluster) - high probabilities for all items (dyspnoea at rest, exertional dyspnoea, sweating, nausea, vomiting, dizziness, blurry vision, presyncope, syncope, palpitation, weakness, other symptoms, other digestive symptoms and discomfort). ¶p for age differences within each sex; #p for differences between sexes.

Supplementary Table 2. Clinical presentation of patients with non-ST elevation acute coronary syndrome, by sex and age\*

|                           | Women        |            |           |           |            | P <sup>¶</sup> | Men        |            |            |           |            | P <sup>¶</sup> | P <sup>#</sup> |
|---------------------------|--------------|------------|-----------|-----------|------------|----------------|------------|------------|------------|-----------|------------|----------------|----------------|
|                           | <=45         | 46-64      | 65-79     | >=80      | Total      |                | <=45       | 46-64      | 65-79      | >=80      | Total      |                |                |
| <b>Total</b>              | 8 (6.3)      | 32 (25.4)  | 56 (44.4) | 30 (23.8) | 126 (100)  |                | 24 (6.5)   | 159 (43.2) | 143 (38.9) | 42 (11.4) | 368 (100)  |                |                |
| <b>Pain</b>               | 8 (100.0)    | 31 (96.9)  | 52 (92.9) | 28 (93.3) | 119 (94.4) | 0.864          | 24 (100.0) | 155 (97.5) | 141 (98.6) | 38 (90.5) | 358 (97.3) | 0.073          | 0.131          |
| <b>Pain location†</b>     |              |            |           |           |            |                |            |            |            |           |            |                |                |
| <b>Typical</b>            | 7 (87.5)     | 26 (83.9)  | 44 (86.3) | 23 (82.1) | 100 (84.7) |                | 22 (91.7)  | 126 (82.4) | 120 (85.1) | 31 (81.6) | 299 (84.0) |                |                |
| <b>Atypical</b>           | 0 (0.0)      | 5 (16.1)   | 3 (5.9)   | 1 (3.6)   | 9 (7.6)    |                | 2 (8.3)    | 16 (10.5)  | 16 (11.3)  | 5 (13.2)  | 39 (11.0)  |                |                |
| <b>Mixture</b>            | 1 (12.5)     | 0 (0.0)    | 4 (7.8)   | 4 (14.3)  | 9 (7.6)    | 0.172          | 0 (0.0)    | 11 (7.2)   | 5 (3.5)    | 2 (5.3)   | 18 (5.1)   | 0.778          | 0.367          |
| <b>Referred pain</b>      | 5 (62.5)     | 23 (74.2)  | 34 (65.4) | 17 (60.7) | 79 (66.4)  | 0.728          | 14 (58.3)  | 89 (57.4)  | 75 (53.2)  | 16 (42.1) | 194 (54.2) | 0.350          | 0.020          |
| <b>Radiation type‡</b>    |              |            |           |           |            |                |            |            |            |           |            |                |                |
| <b>Typical</b>            | 5 (100.0)    | 12 (52.2)  | 11 (32.4) | 6 (35.3)  | 34 (43.0)  |                | 9 (64.3)   | 61 (69.3)  | 41 (54.7)  | 7 (43.8)  | 118 (61.1) |                |                |
| <b>Atypical</b>           | 0 (0.0)      | 8 (34.8)   | 8 (23.5)  | 9 (52.9)  | 25 (31.6)  |                | 2 (14.3)   | 16 (18.2)  | 30 (40.0)  | 5 (31.3)  | 53 (27.5)  |                |                |
| <b>Mixture</b>            | 0 (0.0)      | 3 (13.0)   | 15 (44.1) | 2 (11.8)  | 20 (25.3)  | 0.008          | 3 (21.4)   | 11 (12.5)  | 4 (5.3)    | 4 (25.0)  | 22 (11.4)  | 0.007          | 0.005          |
| <b>Pain intensity§</b>    | 9.5 (8.5-10) | 9.5 (8-10) | 8 (8-10)  | 8 (7-9)   | 9 (8-10)   | 0.224          | 8 (6-9)    | 8 (6-9)    | 8 (6-9)    | 8 (7.5-9) | 8 (6-9)    | 0.200          | <0.001         |
| <b>Symptom</b>            | 6 (75.0)     | 25 (78.1)  | 44 (78.6) | 24 (80.0) | 99 (78.6)  | 0.992          | 20 (83.3)  | 104 (65.4) | 90 (62.9)  | 28 (66.7) | 242 (65.8) | 0.278          | 0.007          |
| <b>Symptom clusters  </b> |              |            |           |           |            |                |            |            |            |           |            |                |                |
| <b>Cluster 1</b>          | 5 (62.5)     | 23 (71.9)  | 35 (62.5) | 21 (70.0) | 84 (66.7)  |                | 17 (70.8)  | 130 (81.8) | 116 (81.1) | 36 (85.7) | 299 (81.3) |                |                |
| <b>Cluster 2</b>          | 2 (25.0)     | 6 (18.8)   | 12 (21.4) | 4 (13.3)  | 24 (19.1)  |                | 6 (25.0)   | 23 (14.5)  | 16 (11.2)  | 6 (14.3)  | 51 (13.9)  |                |                |
| <b>Cluster 3</b>          | 1 (12.5)     | 3 (9.4)    | 9 (16.1)  | 5 (16.7)  | 18 (14.3)  | 0.919          | 1 (4.2)    | 6 (3.8)    | 11 (7.7)   | 0 (0.0)   | 18 (4.9)   | 0.231          | <0.001         |
| <b>Activity</b>           |              |            |           |           |            |                |            |            |            |           |            |                |                |
| <b>Sleep</b>              | 1 (14.3)     | 13 (44.8)  | 7 (12.7)  | 4 (14.3)  | 25 (21.0)  |                | 1 (4.2)    | 36 (23.1)  | 25 (17.7)  | 9 (22.0)  | 71 (19.6)  |                |                |
| <b>Rest</b>               | 2 (28.6)     | 9 (31.0)   | 28 (50.9) | 15 (53.6) | 54 (45.4)  |                | 15 (62.5)  | 59 (37.8)  | 62 (44.0)  | 20 (48.8) | 156 (43.1) |                |                |
| <b>Exertion</b>           | 4 (57.1)     | 7 (24.1)   | 20 (36.4) | 9 (32.1)  | 40 (33.6)  | 0.032          | 8 (33.3)   | 61 (39.1)  | 54 (38.3)  | 12 (29.3) | 135 (37.3) | 0.180          | 0.768          |
| <b>Stress trigger</b>     | 1 (12.5)     | 4 (12.5)   | 7 (12.7)  | 0 (0.0)   | 12 (9.6)   | 0.140          | 6 (25.0)   | 12 (7.7)   | 9 (6.4)    | 4 (9.8)   | 31 (8.6)   | 0.044          | 0.731          |

\*Values are number and percentage unless otherwise indicated. †Pain location: Typical - retrosternal, precordial, right thoracic, or bilateral thoracic; Atypical - epigastric, back, left arm or shoulder, right arm or shoulder, neck, or jaw; Mixture - typical and atypical location. ‡Radiation type: Typical - left arm or shoulder, right arm or shoulder, neck, or jaw; Atypical: retrosternal, precordial, right thoracic, bilateral thoracic, epigastric, or back regions; Mixture: typical and atypical irradiation. §Median (interquartile range). ||Symptom clusters: cluster 1 (no symptom cluster) - low endorsement probabilities for all items; cluster 2 (dyspnoea and sweating cluster) - high probability for dyspnoea at rest and sweating; cluster 3 (multiple symptoms cluster) - high probabilities for all items (dyspnoea at rest, exertional dyspnoea, sweating, nausea, vomiting, dizziness, blurry vision, presyncope, syncope, palpitation, weakness, other symptoms, other digestive symptoms and discomfort). ¶p for age differences within each sex; #p for differences between sexes.



Supplementary Table 3. Marginal percentage of subjects with each symptom in each assigned cluster\*

|                                 | Symptom clusters                |                                 |                                |
|---------------------------------|---------------------------------|---------------------------------|--------------------------------|
|                                 | Cluster 1 <sup>*</sup><br>n=639 | Cluster 2 <sup>†</sup><br>n=167 | Cluster 3 <sup>‡</sup><br>n=67 |
| <b>Dyspnoea at rest</b>         | 17.4                            | 34.2                            | 37.3                           |
| <b>Exertional dyspnoea</b>      | 6.0                             | 2.1                             | 14.5                           |
| <b>Sweating</b>                 | 22.2                            | 89.6                            | 71.7                           |
| <b>Nausea and vomiting</b>      | 6.5                             | 9.7                             | 41.4                           |
| <b>Dizziness</b>                | 2.6                             | 18.0                            | 74.1                           |
| <b>Blurry vision</b>            | 0.6                             | 4.4                             | 27.5                           |
| <b>Presyncope</b>               | 1.3                             | 11.4                            | 42.7                           |
| <b>Syncope</b>                  | 1.6                             | 3.6                             | 10.5                           |
| <b>Palpitations</b>             | 0.3                             | 5.4                             | 19.5                           |
| <b>Weakness</b>                 | 7.5                             | 17.8                            | 64.4                           |
| <b>“Other symptoms”</b>         | 4.5                             | 5.5                             | 12.8                           |
| <b>Other digestive symptoms</b> | 1.0                             | 1.0                             | 1.4                            |
| <b>Discomfort</b>               | 1.3                             | 1.1                             | 4.2                            |

\*Values are percentages.

† Cluster 1: no symptom cluster; † Cluster 2: dyspnoea and sweating cluster; ‡ Cluster 3: multiple symptoms cluster.

**Supplementary Table 4.** Differences between women and men in clinical presentation of acute coronary syndrome, by age group (< 55 vs ≥55 years old) (men are the reference class).

| Symptoms                                                 | <55 years |            | ≥55 years |             | Interaction p-value | Adjusted for                                                                               |
|----------------------------------------------------------|-----------|------------|-----------|-------------|---------------------|--------------------------------------------------------------------------------------------|
|                                                          | OR        | 95% CI     | OR        | 95% CI      |                     |                                                                                            |
| <b>Pain</b>                                              | --*       | --*        | 0.46      | 0.18-1.18   | 0.777               | Age, type of ACS, marital status, dyslipidaemia, CABG                                      |
| <b>Typical (chest) pain</b><br>(vs atypical or mixture)† | 0.65      | 0.23-1.86  | 1.55      | 0.88-2.71   | 0.973               | Age, type of ACS, coronary anatomy, region, smoking, dyslipidaemia, previous heart failure |
| <b>Referred pain</b>                                     | 3.81      | 1.41-10.3  | 1.73      | 1.14-2.61   | 0.528               | Age, type of ACS, coronary anatomy, region, income, social class, previous renal failure.  |
| <b>Radiation type‡</b>                                   |           |            |           |             |                     |                                                                                            |
| <b>Typical</b>                                           | 1         | Reference  | 1         | Reference   |                     | Age, type of ACS, employment status, region                                                |
| <b>Atypical</b>                                          | 1.19      | 0.41-3.45  | 1.34      | 0.77-2.35   | 0.415               |                                                                                            |
| <b>Mixture</b>                                           | 1.43      | 0.40-5.16  | 2.56      | 1.39-4.71   | 0.606               |                                                                                            |
| <b>Pain intensity</b><br>(higher than 8/10)              | 5.23      | 2.17-12.60 | 2.09      | 1.35-3.24   | 0.028               | Age, type of ACS, coronary anatomy, education, professional group, previous AMI            |
| <b>Symptoms</b>                                          | 1.88      | 0.76-4.66  | 1.91      | 1.21-3.04   | 0.799               | Age, type of ACS, region, previous AMI, previous heart failure                             |
| <b>Symptom clusters§</b>                                 |           |            |           |             |                     |                                                                                            |
| <b>Cluster 1</b>                                         | 1         | Reference  | 1         | Reference   |                     | Age, type of ACS, professional group, region, previous AMI                                 |
| <b>Cluster 2</b>                                         | 0.88      | 0.31-2.50  | 1.49      | 0.93-2.38   | 0.246               |                                                                                            |
| <b>Cluster 3</b>                                         | 3.30      | 0.99-10.97 | 4.08      | 2.07-8.05   | 0.501               |                                                                                            |
| <b>Activity group</b>                                    |           |            |           |             |                     |                                                                                            |
| <b>Sleeping</b>                                          | 1         | Reference  | 1         | (Reference) |                     | Age, type of ACS, previous heart failure                                                   |
| <b>Rest</b>                                              | 0.74      | 0.25-2.19  | 1.08      | 0.64-1.81   | 0.284               |                                                                                            |
| <b>Exertion</b>                                          | 0.89      | 0.29-2.67  | 1.27      | 0.74-2.16   | 0.408               |                                                                                            |

ACS, acute coronary syndrome; AMI, acute myocardial infarction; CABG: coronary artery bypass surgery; CI, confidence interval; OR, odds ratio.

\*All women below 55 years old presented with pain.

†Pain location: Typical - retrosternal, precordial, right thoracic, or bilateral thoracic; Atypical - epigastric, back, left arm or shoulder, right arm or shoulder, neck, or jaw; Mixture - typical and atypical location.

‡Radiation type: Typical - left arm or shoulder, right arm or shoulder, neck, or jaw; Atypical: retrosternal, precordial, right thoracic, bilateral thoracic, epigastric, or back regions; Mixture: typical and atypical irradiation.

§Symptom clusters: cluster 1 (no symptom cluster) - low endorsement probabilities for all items; cluster 2 (dyspnoea and sweating cluster) - high probability for dyspnoea at rest and sweating; cluster 3 (multiple symptoms cluster) - high probabilities for all items (dyspnoea at rest, exertional dyspnoea, sweating, nausea, vomiting, dizziness, blurry vision, presyncope, syncope, palpitation, weakness, other symptoms, other digestive symptoms and discomfort).

STROBE Statement—checklist of items : *Sex differences in presenting symptoms of acute coronary syndrome: the EPIHeart cohort study*

|                              | Item No | Recommendation                                                                                                                                                                                                                                                                                                                                                                                                                                                                                                                                                                                                                                                                                                                                                                                                                                                   |
|------------------------------|---------|------------------------------------------------------------------------------------------------------------------------------------------------------------------------------------------------------------------------------------------------------------------------------------------------------------------------------------------------------------------------------------------------------------------------------------------------------------------------------------------------------------------------------------------------------------------------------------------------------------------------------------------------------------------------------------------------------------------------------------------------------------------------------------------------------------------------------------------------------------------|
| <b>Title and abstract</b>    | 1       | (a) Indicate the study's design with a commonly used term in the title or the abstract – <b>page 1 (title) and page 2 (abstract)</b><br>(b) Provide in the abstract an informative and balanced summary of what was done and what was found – <b>page 2</b>                                                                                                                                                                                                                                                                                                                                                                                                                                                                                                                                                                                                      |
| <b>Introduction</b>          |         |                                                                                                                                                                                                                                                                                                                                                                                                                                                                                                                                                                                                                                                                                                                                                                                                                                                                  |
| Background/rationale         | 2       | Explain the scientific background and rationale for the investigation being reported – <b>page 4</b>                                                                                                                                                                                                                                                                                                                                                                                                                                                                                                                                                                                                                                                                                                                                                             |
| Objectives                   | 3       | State specific objectives, including any prespecified hypotheses - <b>page 4</b>                                                                                                                                                                                                                                                                                                                                                                                                                                                                                                                                                                                                                                                                                                                                                                                 |
| <b>Methods</b>               |         |                                                                                                                                                                                                                                                                                                                                                                                                                                                                                                                                                                                                                                                                                                                                                                                                                                                                  |
| Study design                 | 4       | Present key elements of study design early in the paper – <b>pages 4 and 5</b>                                                                                                                                                                                                                                                                                                                                                                                                                                                                                                                                                                                                                                                                                                                                                                                   |
| Setting                      | 5       | Describe the setting, locations, and relevant dates, including periods of recruitment, exposure, follow-up, and data collection – <b>pages 4-6</b>                                                                                                                                                                                                                                                                                                                                                                                                                                                                                                                                                                                                                                                                                                               |
| Participants                 | 6       | <i>Cohort study</i> : Give the eligibility criteria, and the sources and methods of selection of participants – <b>pages 4 and 5</b>                                                                                                                                                                                                                                                                                                                                                                                                                                                                                                                                                                                                                                                                                                                             |
| Variables                    | 7       | Clearly define all outcomes, exposures, predictors, potential confounders, and effect modifiers. Give diagnostic criteria, if applicable – <b>pages 6 and 7</b>                                                                                                                                                                                                                                                                                                                                                                                                                                                                                                                                                                                                                                                                                                  |
| Data sources/<br>measurement | 8       | For each variable of interest, give sources of data and details of methods of assessment (measurement). Describe comparability of assessment methods if there is more than one group – <b>pages 5, 6 and 7</b>                                                                                                                                                                                                                                                                                                                                                                                                                                                                                                                                                                                                                                                   |
| Bias                         | 9       | Describe any efforts to address potential sources of bias - <b>page 7</b>                                                                                                                                                                                                                                                                                                                                                                                                                                                                                                                                                                                                                                                                                                                                                                                        |
| Study size                   | 10      | Explain how the study size was arrived at – <b>page 5 and figure 1</b>                                                                                                                                                                                                                                                                                                                                                                                                                                                                                                                                                                                                                                                                                                                                                                                           |
| Quantitative variables       | 11      | Explain how quantitative variables were handled in the analyses. If applicable, describe which groupings were chosen and why – <b>page 6 and 7</b>                                                                                                                                                                                                                                                                                                                                                                                                                                                                                                                                                                                                                                                                                                               |
| Statistical methods          | 12      | (a) Describe all statistical methods, including those used to control for confounding - <b>page 7</b><br>(b) Describe any methods used to examine subgroups and interactions – <b>page 7</b><br>(c) Explain how missing data were addressed – <b>Patients who were unable to answer the questionnaire (with missing data on clinical presentation) were not included.</b><br>(d) <i>Cohort study</i> —If applicable, explain how loss to follow-up was addressed – <b>Data were collected within a cohort study, but clinical presentation was collected through a questionnaire.</b><br>(e) Describe any sensitivity analyses – <b>We analysed clinical presentation separately by type of acute coronary syndrome (Supplementary tables 1 and 2), but as results were similar by sex and age both types of acute coronary syndrome were analysed together.</b> |

Continued on next page

1  
2  
3  
4  
5  
6  
7  
8  
9  
10  
11  
12  
13  
14  
15  
16  
17  
18  
19  
20  
21  
22  
23  
24  
25  
26  
27  
28  
29  
30  
31  
32  
33  
34  
35  
36  
37  
38  
39  
40  
41  
42  
43  
44  
45  
46  
47  
48  
49  
50  
51  
52  
53  
54  
55  
56  
57  
58  
59  
60

| <b>Results</b>           |    |                                                                                                                                                                                                                                                                                                                                                           |
|--------------------------|----|-----------------------------------------------------------------------------------------------------------------------------------------------------------------------------------------------------------------------------------------------------------------------------------------------------------------------------------------------------------|
| Participants             | 13 | (a) Report numbers of individuals at each stage of study—eg numbers potentially eligible, examined for eligibility, confirmed eligible, included in the study, completing follow-up, and analysed – <b>pages 4 and 5</b><br>(b) Give reasons for non-participation at each stage – <b>page 5</b><br>(c) Consider use of a flow diagram – <b>Figure 1.</b> |
| Descriptive data         | 14 | (a) Give characteristics of study participants (eg demographic, clinical, social) and information on exposures and potential confounders – <b>pages 8-9</b><br>(b) Indicate number of participants with missing data for each variable of interest – <b>page 9</b>                                                                                        |
| Outcome data             | 15 | <i>Cohort study</i> —Report numbers of outcome events or summary measures over time – <b>pages 10-12</b>                                                                                                                                                                                                                                                  |
| Main results             | 16 | (a) Give unadjusted estimates and, if applicable, confounder-adjusted estimates and their precision (eg, 95% confidence interval). Make clear which confounders were adjusted for and why they were included – <b>pages 13-16</b><br>(b) Report category boundaries when continuous variables were categorized – <b>pages 10-14</b>                       |
| Other analyses           | 17 | Report other analyses done—<br>eg analyses of subgroups and interactions, and sensitivity analyses – <b>page 10</b>                                                                                                                                                                                                                                       |
| <b>Discussion</b>        |    |                                                                                                                                                                                                                                                                                                                                                           |
| Key results              | 18 | Summarise key results with reference to study objectives – <b>page 17</b>                                                                                                                                                                                                                                                                                 |
| Limitations              | 19 | Discuss limitations of the study, taking into account sources of potential bias or imprecision. Discuss both direction and magnitude of any potential bias – <b>pages 19 and 20</b>                                                                                                                                                                       |
| Interpretation           | 20 | Give a cautious overall interpretation of results considering objectives, limitations, multiplicity of analyses, results from similar studies, and other relevant evidence - <b>pages 17-19</b>                                                                                                                                                           |
| Generalisability         | 21 | Discuss the generalisability (external validity) of the study results – <b>page 19</b>                                                                                                                                                                                                                                                                    |
| <b>Other information</b> |    |                                                                                                                                                                                                                                                                                                                                                           |
| Funding                  | 22 | Give the source of funding and the role of the funders for the present study and, if applicable, for the original study on which the present article is based – <b>page 22</b>                                                                                                                                                                            |
