# Supplementary material for: Sex differences in presenting symptoms of acute coronary syndrome: the EPIHeart cohort study
Source: PubMed Central journal article supplement — BMJ Open. 2018 Feb 23;8(2):e018798. doi: 10.1136/bmjopen-2017-018798 (PMC5855399; doi:10.1136/bmjopen-2017-018798), 2018-02-23
Supplement: bmjopen-2017-018798supp002.pdf [file bmjopen-2017-018798supp002.pdf]

**Supplementary Table 2. Clinical presentation of patients with non-ST elevation acute coronary syndrome, by sex and age\***

|                                      | Women        |            |           |           |            | P <sup>†</sup> | Men        |            |            |           |            | P <sup>†</sup> | P <sup>#</sup> |
|--------------------------------------|--------------|------------|-----------|-----------|------------|----------------|------------|------------|------------|-----------|------------|----------------|----------------|
|                                      | <=45         | 46-64      | 65-79     | >=80      | Total      |                | <=45       | 46-64      | 65-79      | >=80      | Total      |                |                |
| <b>Total</b>                         | 8 (6.3)      | 32 (25.4)  | 56 (44.4) | 30 (23.8) | 126 (100)  |                | 24 (6.5)   | 159 (43.2) | 143 (38.9) | 42 (11.4) | 368 (100)  |                |                |
| <b>Pain</b>                          | 8 (100.0)    | 31 (96.9)  | 52 (92.9) | 28 (93.3) | 119 (94.4) | 0.864          | 24 (100.0) | 155 (97.5) | 141 (98.6) | 38 (90.5) | 358 (97.3) | 0.073          | 0.131          |
| <b>Pain location<sup>†</sup></b>     |              |            |           |           |            |                |            |            |            |           |            |                |                |
| <b>Typical</b>                       | 7 (87.5)     | 26 (83.9)  | 44 (86.3) | 23 (82.1) | 100 (84.7) |                | 22 (91.7)  | 126 (82.4) | 120 (85.1) | 31 (81.6) | 299 (84.0) |                |                |
| <b>Atypical</b>                      | 0 (0.0)      | 5 (16.1)   | 3 (5.9)   | 1 (3.6)   | 9 (7.6)    |                | 2 (8.3)    | 16 (10.5)  | 16 (11.3)  | 5 (13.2)  | 39 (11.0)  |                |                |
| <b>Mixture</b>                       | 1 (12.5)     | 0 (0.0)    | 4 (7.8)   | 4 (14.3)  | 9 (7.6)    | 0.172          | 0 (0.0)    | 11 (7.2)   | 5 (3.5)    | 2 (5.3)   | 18 (5.1)   | 0.778          | 0.367          |
| <b>Referred pain</b>                 | 5 (62.5)     | 23 (74.2)  | 34 (65.4) | 17 (60.7) | 79 (66.4)  | 0.728          | 14 (58.3)  | 89 (57.4)  | 75 (53.2)  | 16 (42.1) | 194 (54.2) | 0.350          | 0.020          |
| <b>Radiation type<sup>‡</sup></b>    |              |            |           |           |            |                |            |            |            |           |            |                |                |
| <b>Typical</b>                       | 5 (100.0)    | 12 (52.2)  | 11 (32.4) | 6 (35.3)  | 34 (43.0)  |                | 9 (64.3)   | 61 (69.3)  | 41 (54.7)  | 7 (43.8)  | 118 (61.1) |                |                |
| <b>Atypical</b>                      | 0 (0.0)      | 8 (34.8)   | 8 (23.5)  | 9 (52.9)  | 25 (31.6)  |                | 2 (14.3)   | 16 (18.2)  | 30 (40.0)  | 5 (31.3)  | 53 (27.5)  |                |                |
| <b>Mixture</b>                       | 0 (0.0)      | 3 (13.0)   | 15 (44.1) | 2 (11.8)  | 20 (25.3)  | 0.008          | 3 (21.4)   | 11 (12.5)  | 4 (5.3)    | 4 (25.0)  | 22 (11.4)  | 0.007          | 0.005          |
| <b>Pain intensity<sup>§</sup></b>    | 9.5 (8.5-10) | 9.5 (8-10) | 8 (8-10)  | 8 (7-9)   | 9 (8-10)   | 0.224          | 8 (6-9)    | 8 (6-9)    | 8 (6-9)    | 8 (7.5-9) | 8 (6-9)    | 0.200          | <0.001         |
| <b>Symptom</b>                       | 6 (75.0)     | 25 (78.1)  | 44 (78.6) | 24 (80.0) | 99 (78.6)  | 0.992          | 20 (83.3)  | 104 (65.4) | 90 (62.9)  | 28 (66.7) | 242 (65.8) | 0.278          | 0.007          |
| <b>Symptom clusters<sup>  </sup></b> |              |            |           |           |            |                |            |            |            |           |            |                |                |
| <b>Cluster 1</b>                     | 5 (62.5)     | 23 (71.9)  | 35 (62.5) | 21 (70.0) | 84 (66.7)  |                | 17 (70.8)  | 130 (81.8) | 116 (81.1) | 36 (85.7) | 299 (81.3) |                |                |
| <b>Cluster 2</b>                     | 2 (25.0)     | 6 (18.8)   | 12 (21.4) | 4 (13.3)  | 24 (19.1)  |                | 6 (25.0)   | 23 (14.5)  | 16 (11.2)  | 6 (14.3)  | 51 (13.9)  |                |                |
| <b>Cluster 3</b>                     | 1 (12.5)     | 3 (9.4)    | 9 (16.1)  | 5 (16.7)  | 18 (14.3)  | 0.919          | 1 (4.2)    | 6 (3.8)    | 11 (7.7)   | 0 (0.0)   | 18 (4.9)   | 0.231          | <0.001         |
| <b>Activity</b>                      |              |            |           |           |            |                |            |            |            |           |            |                |                |
| <b>Sleep</b>                         | 1 (14.3)     | 13 (44.8)  | 7 (12.7)  | 4 (14.3)  | 25 (21.0)  |                | 1 (4.2)    | 36 (23.1)  | 25 (17.7)  | 9 (22.0)  | 71 (19.6)  |                |                |
| <b>Rest</b>                          | 2 (28.6)     | 9 (31.0)   | 28 (50.9) | 15 (53.6) | 54 (45.4)  |                | 15 (62.5)  | 59 (37.8)  | 62 (44.0)  | 20 (48.8) | 156 (43.1) |                |                |
| <b>Exertion</b>                      | 4 (57.1)     | 7 (24.1)   | 20 (36.4) | 9 (32.1)  | 40 (33.6)  | 0.032          | 8 (33.3)   | 61 (39.1)  | 54 (38.3)  | 12 (29.3) | 135 (37.3) | 0.180          | 0.768          |
| <b>Stress trigger</b>                | 1 (12.5)     | 4 (12.5)   | 7 (12.7)  | 0 (0.0)   | 12 (9.6)   | 0.140          | 6 (25.0)   | 12 (7.7)   | 9 (6.4)    | 4 (9.8)   | 31 (8.6)   | 0.044          | 0.731          |

\*Values are number and percentage unless otherwise indicated. †Pain location: Typical - retrosternal, precordial, right thoracic, or bilateral thoracic; Atypical - epigastric, back, left arm or shoulder, right arm or shoulder, neck, or jaw; Mixture - typical and atypical location. ‡Radiation type: Typical - left arm or shoulder, right arm or shoulder, neck, or jaw; Atypical: retrosternal, precordial, right thoracic, bilateral thoracic, epigastric, or back regions; Mixture: typical and atypical irradiation. §Median (interquartile range). ||Symptom clusters: cluster 1 (no symptom cluster) - low endorsement probabilities for all items; cluster 2 (dyspnoea and sweating cluster) - high probability for dyspnoea at rest and sweating; cluster 3 (multiple symptoms cluster) - high probabilities for all items (dyspnoea at rest, exertional dyspnoea, sweating, nausea, vomiting, dizziness, blurry vision, presyncope, syncope, palpitation, weakness, other symptoms, other digestive symptoms and discomfort). ¶p for age differences within each sex; #p for differences between sexes.
