# Supplementary material for: Sex differences in presenting symptoms of acute coronary syndrome: the EPIHeart cohort study
Source: PubMed Central journal article supplement — BMJ Open. 2018 Feb 23;8(2):e018798. doi: 10.1136/bmjopen-2017-018798 (PMC5855399; doi:10.1136/bmjopen-2017-018798), 2018-02-23
Supplement: bmjopen-2017-018798supp003.pdf [file bmjopen-2017-018798supp003.pdf]

Supplementary Table 3. Marginal percentage of subjects with each symptom in each assigned cluster\*

|                                 | <b>Symptom clusters</b>               |                                       |                                      |
|---------------------------------|---------------------------------------|---------------------------------------|--------------------------------------|
|                                 | <b>Cluster 1<sup>*</sup></b><br>n=639 | <b>Cluster 2<sup>†</sup></b><br>n=167 | <b>Cluster 3<sup>‡</sup></b><br>n=67 |
| <b>Dyspnoea at rest</b>         | 17.4                                  | 34.2                                  | 37.3                                 |
| <b>Exertional dyspnoea</b>      | 6.0                                   | 2.1                                   | 14.5                                 |
| <b>Sweating</b>                 | 22.2                                  | 89.6                                  | 71.7                                 |
| <b>Nausea and vomiting</b>      | 6.5                                   | 9.7                                   | 41.4                                 |
| <b>Dizziness</b>                | 2.6                                   | 18.0                                  | 74.1                                 |
| <b>Blurry vision</b>            | 0.6                                   | 4.4                                   | 27.5                                 |
| <b>Presyncope</b>               | 1.3                                   | 11.4                                  | 42.7                                 |
| <b>Syncope</b>                  | 1.6                                   | 3.6                                   | 10.5                                 |
| <b>Palpitations</b>             | 0.3                                   | 5.4                                   | 19.5                                 |
| <b>Weakness</b>                 | 7.5                                   | 17.8                                  | 64.4                                 |
| <b>“Other symptoms”</b>         | 4.5                                   | 5.5                                   | 12.8                                 |
| <b>Other digestive symptoms</b> | 1.0                                   | 1.0                                   | 1.4                                  |
| <b>Discomfort</b>               | 1.3                                   | 1.1                                   | 4.2                                  |

\*Values are percentages.

<sup>\*</sup>Cluster 1: no symptom cluster; <sup>†</sup>Cluster 2: dyspnoea and sweating cluster; <sup>‡</sup>Cluster 3: multiple symptoms cluster.
