# Supplementary material for: Sex differences in presenting symptoms of acute coronary syndrome: the EPIHeart cohort study
Source: PubMed Central journal article supplement — BMJ Open. 2018 Feb 23;8(2):e018798. doi: 10.1136/bmjopen-2017-018798 (PMC5855399; doi:10.1136/bmjopen-2017-018798), 2018-02-23
Supplement: bmjopen-2017-018798supp004.pdf [file bmjopen-2017-018798supp004.pdf]

**Supplementary Table 4.** Differences between women and men in clinical presentation of acute coronary syndrome, by age group (< 55 vs ≥55 years old) (men are the reference class).

| Symptoms                                                 | <55 years |            | ≥55 years |             | Interaction p-value | Adjusted for                                                                               |
|----------------------------------------------------------|-----------|------------|-----------|-------------|---------------------|--------------------------------------------------------------------------------------------|
|                                                          | OR        | 95% CI     | OR        | 95% CI      |                     |                                                                                            |
| <b>Pain</b>                                              | --*       | --*        | 0.46      | 0.18-1.18   | 0.777               | Age, type of ACS, marital status, dyslipidaemia, CABG                                      |
| <b>Typical (chest) pain</b><br>(vs atypical or mixture)† | 0.65      | 0.23-1.86  | 1.55      | 0.88-2.71   | 0.973               | Age, type of ACS, coronary anatomy, region, smoking, dyslipidaemia, previous heart failure |
| <b>Referred pain</b>                                     | 3.81      | 1.41-10.3  | 1.73      | 1.14-2.61   | 0.528               | Age, type of ACS, coronary anatomy, region, income, social class, previous renal failure.  |
| <b>Radiation type‡</b>                                   |           |            |           |             |                     |                                                                                            |
| <b>Typical</b>                                           | 1         | Reference  | 1         | Reference   |                     | Age, type of ACS, employment status, region                                                |
| <b>Atypical</b>                                          | 1.19      | 0.41-3.45  | 1.34      | 0.77-2.35   | 0.415               |                                                                                            |
| <b>Mixture</b>                                           | 1.43      | 0.40-5.16  | 2.56      | 1.39-4.71   | 0.606               |                                                                                            |
| <b>Pain intensity</b><br>(higher than 8/10)              | 5.23      | 2.17-12.60 | 2.09      | 1.35-3.24   | 0.028               | Age, type of ACS, coronary anatomy, education, professional group, previous AMI            |
| <b>Symptoms</b>                                          | 1.88      | 0.76-4.66  | 1.91      | 1.21-3.04   | 0.799               | Age, type of ACS, region, previous AMI, previous heart failure                             |
| <b>Symptom clusters§</b>                                 |           |            |           |             |                     |                                                                                            |
| <b>Cluster 1</b>                                         | 1         | Reference  | 1         | Reference   |                     | Age, type of ACS, professional group, region, previous AMI                                 |
| <b>Cluster 2</b>                                         | 0.88      | 0.31-2.50  | 1.49      | 0.93-2.38   | 0.246               |                                                                                            |
| <b>Cluster 3</b>                                         | 3.30      | 0.99-10.97 | 4.08      | 2.07-8.05   | 0.501               |                                                                                            |
| <b>Activity group</b>                                    |           |            |           |             |                     |                                                                                            |
| <b>Sleeping</b>                                          | 1         | Reference  | 1         | (Reference) |                     | Age, type of ACS, previous heart failure                                                   |
| <b>Rest</b>                                              | 0.74      | 0.25-2.19  | 1.08      | 0.64-1.81   | 0.284               |                                                                                            |
| <b>Exertion</b>                                          | 0.89      | 0.29-2.67  | 1.27      | 0.74-2.16   | 0.408               |                                                                                            |

ACS, acute coronary syndrome; AMI, acute myocardial infarction; CABG: coronary artery bypass surgery; CI, confidence interval; OR, odds ratio.

\*All women below 55 years old presented with pain.

†Pain location: Typical - retrosternal, precordial, right thoracic, or bilateral thoracic; Atypical - epigastric, back, left arm or shoulder, right arm or shoulder, neck, or jaw; Mixture - typical and atypical location.

‡Radiation type: Typical - left arm or shoulder, right arm or shoulder, neck, or jaw; Atypical: retrosternal, precordial, right thoracic, bilateral thoracic, epigastric, or back regions; Mixture: typical and atypical irradiation.

§Symptom clusters: cluster 1 (no symptom cluster) - low endorsement probabilities for all items; cluster 2 (dyspnoea and sweating cluster) - high probability for dyspnoea at rest and sweating; cluster 3 (multiple symptoms cluster) - high probabilities for all items (dyspnoea at rest, exertional dyspnoea, sweating, nausea, vomiting, dizziness, blurry vision, presyncope, syncope, palpitation, weakness, other symptoms, other digestive symptoms and discomfort).
